# Supplementary material
Source: ML conference proceedings conference paper supplement (https://openreview.net/forum?id=PPCN1atkxB)

Average importance

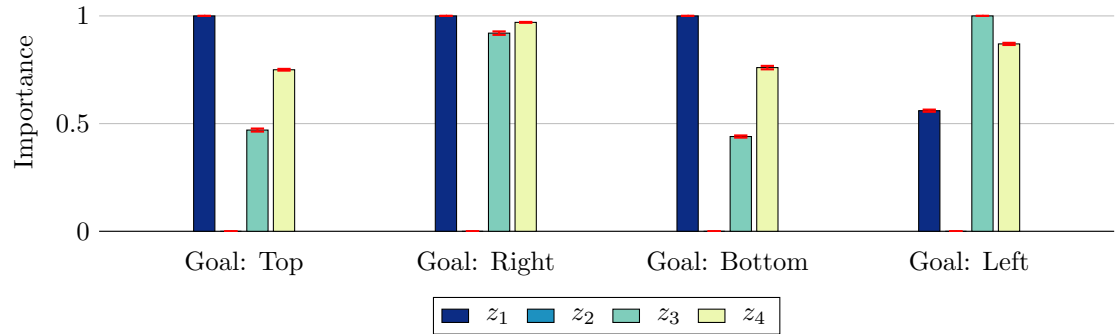

Supplement: supplementary_material [file attachment]

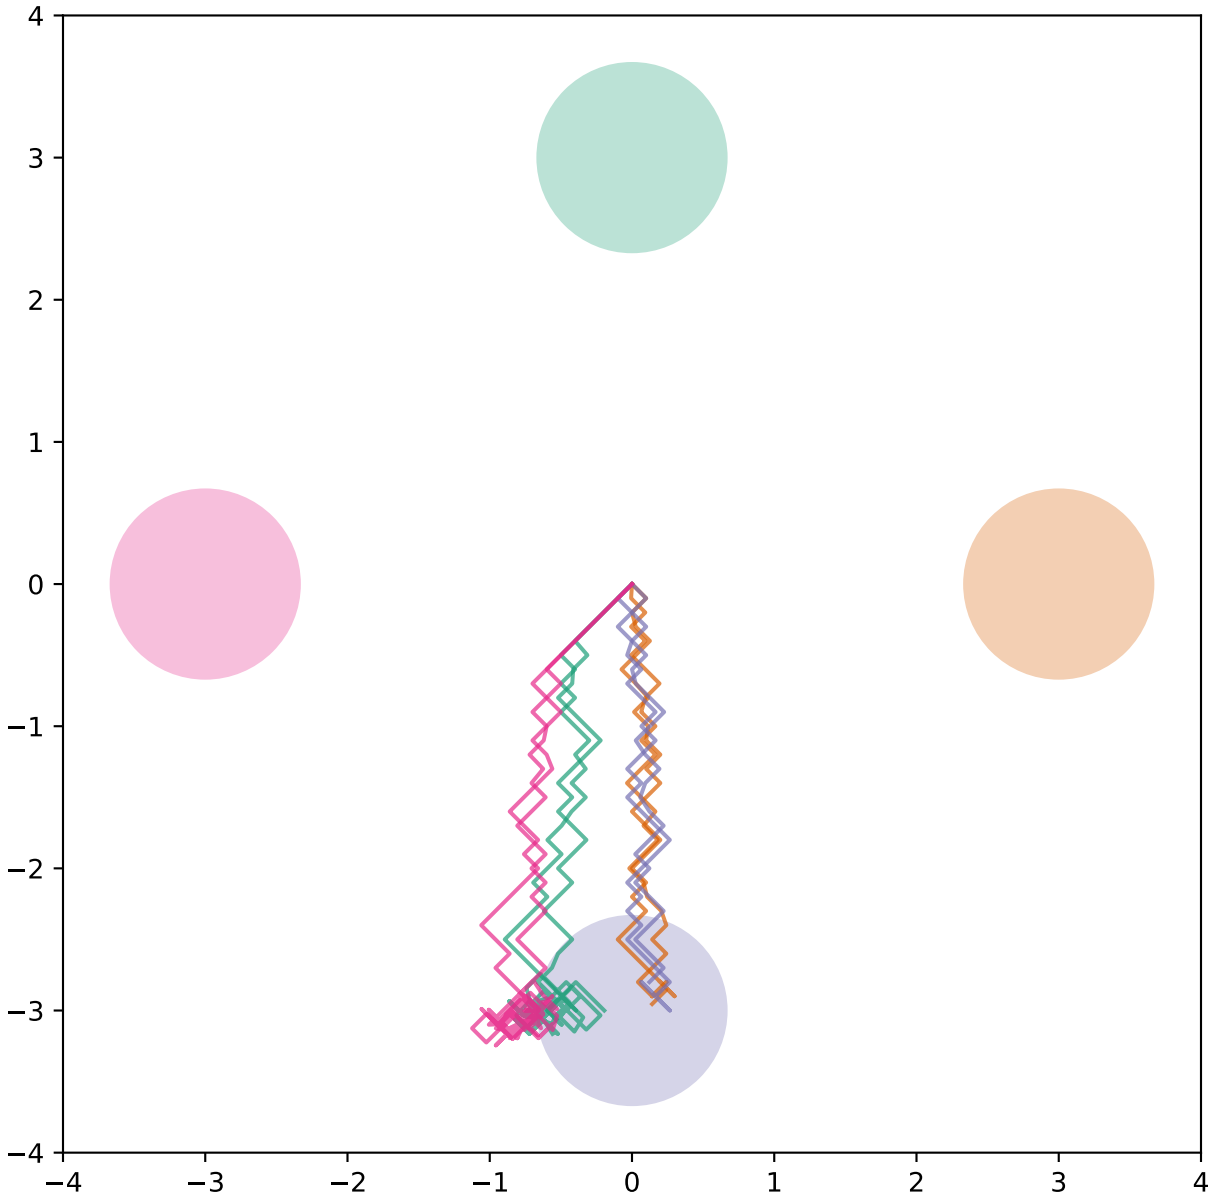

Top

Right

Bottom

Left

Supplement: supplementary_material [file attachment]

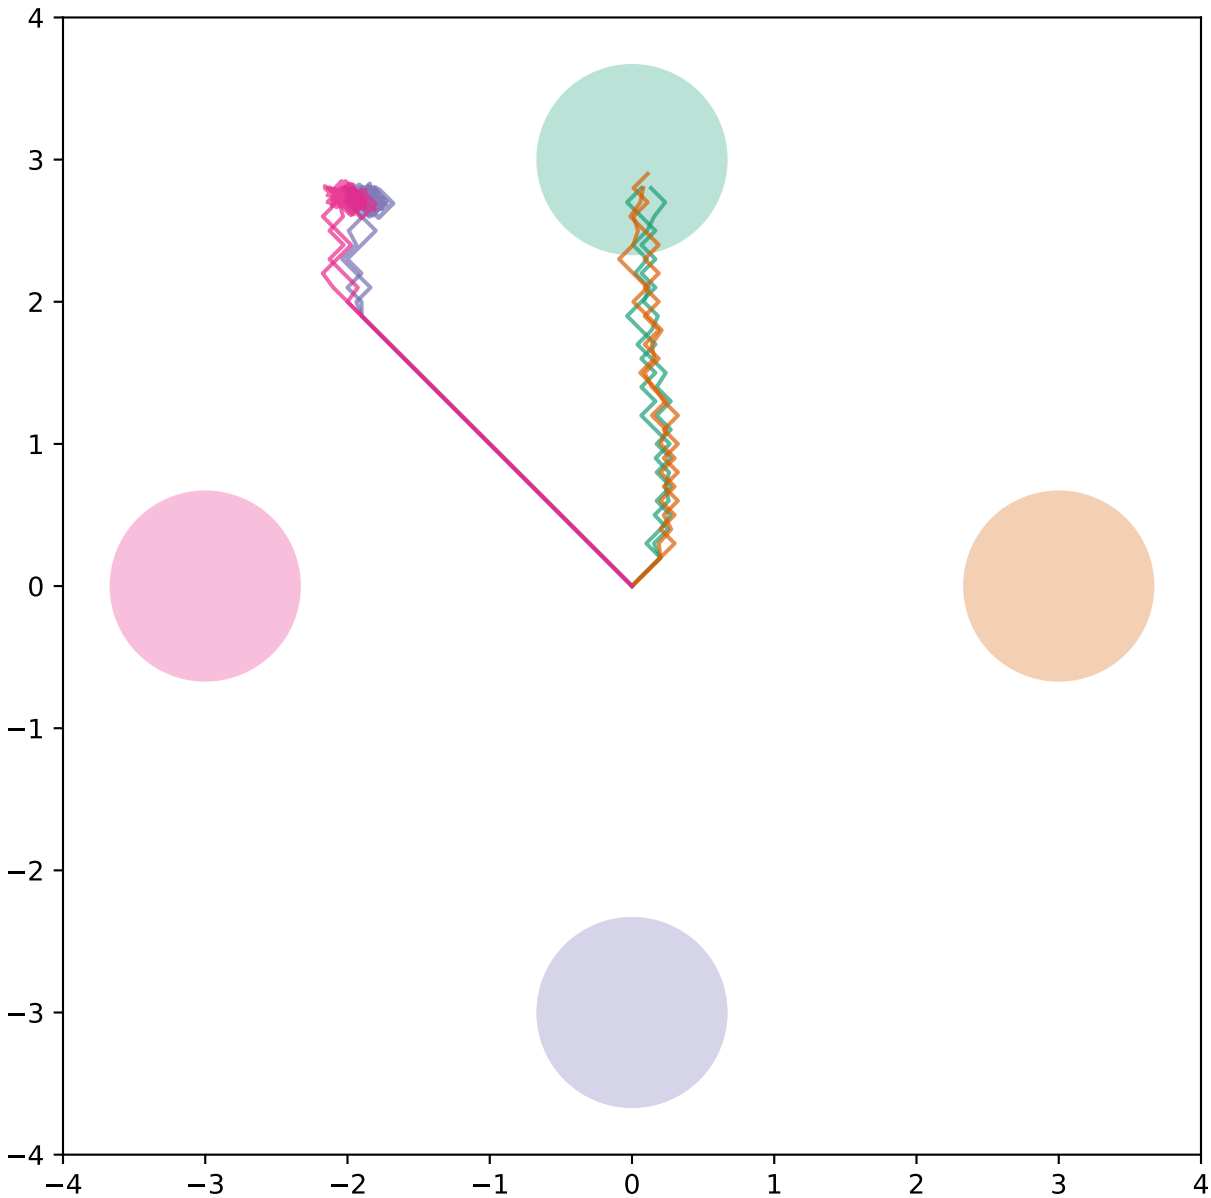

Top Right Bottom Left

Supplement: supplementary_material [file attachment]

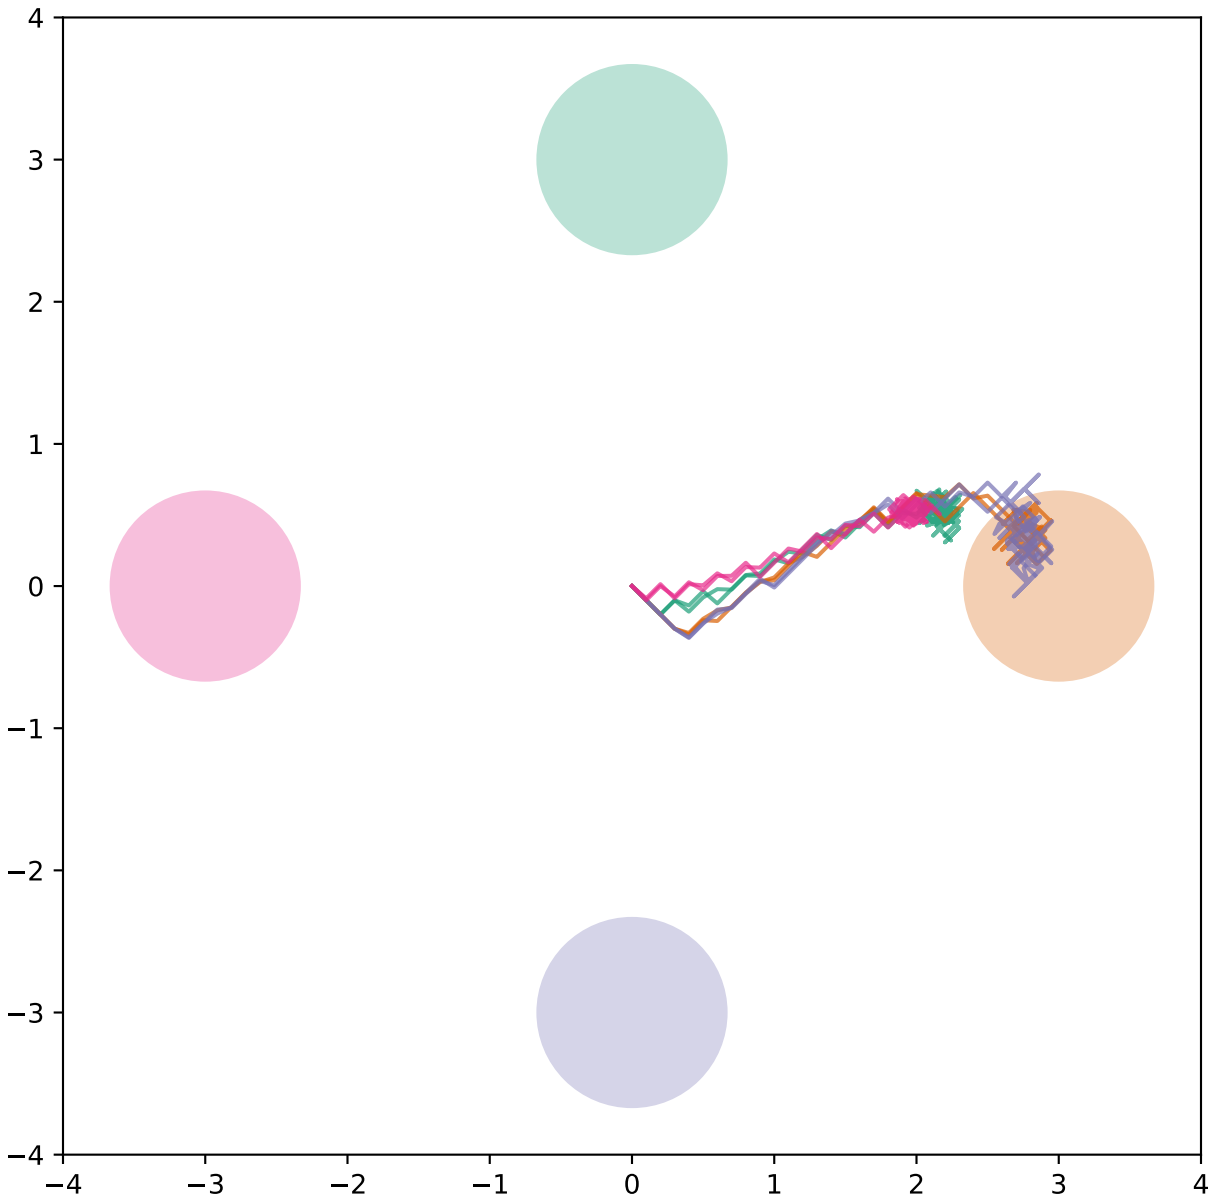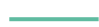

Top

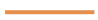

Right

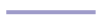

Bottom

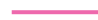

Left

Supplement: supplementary_material [file attachment]

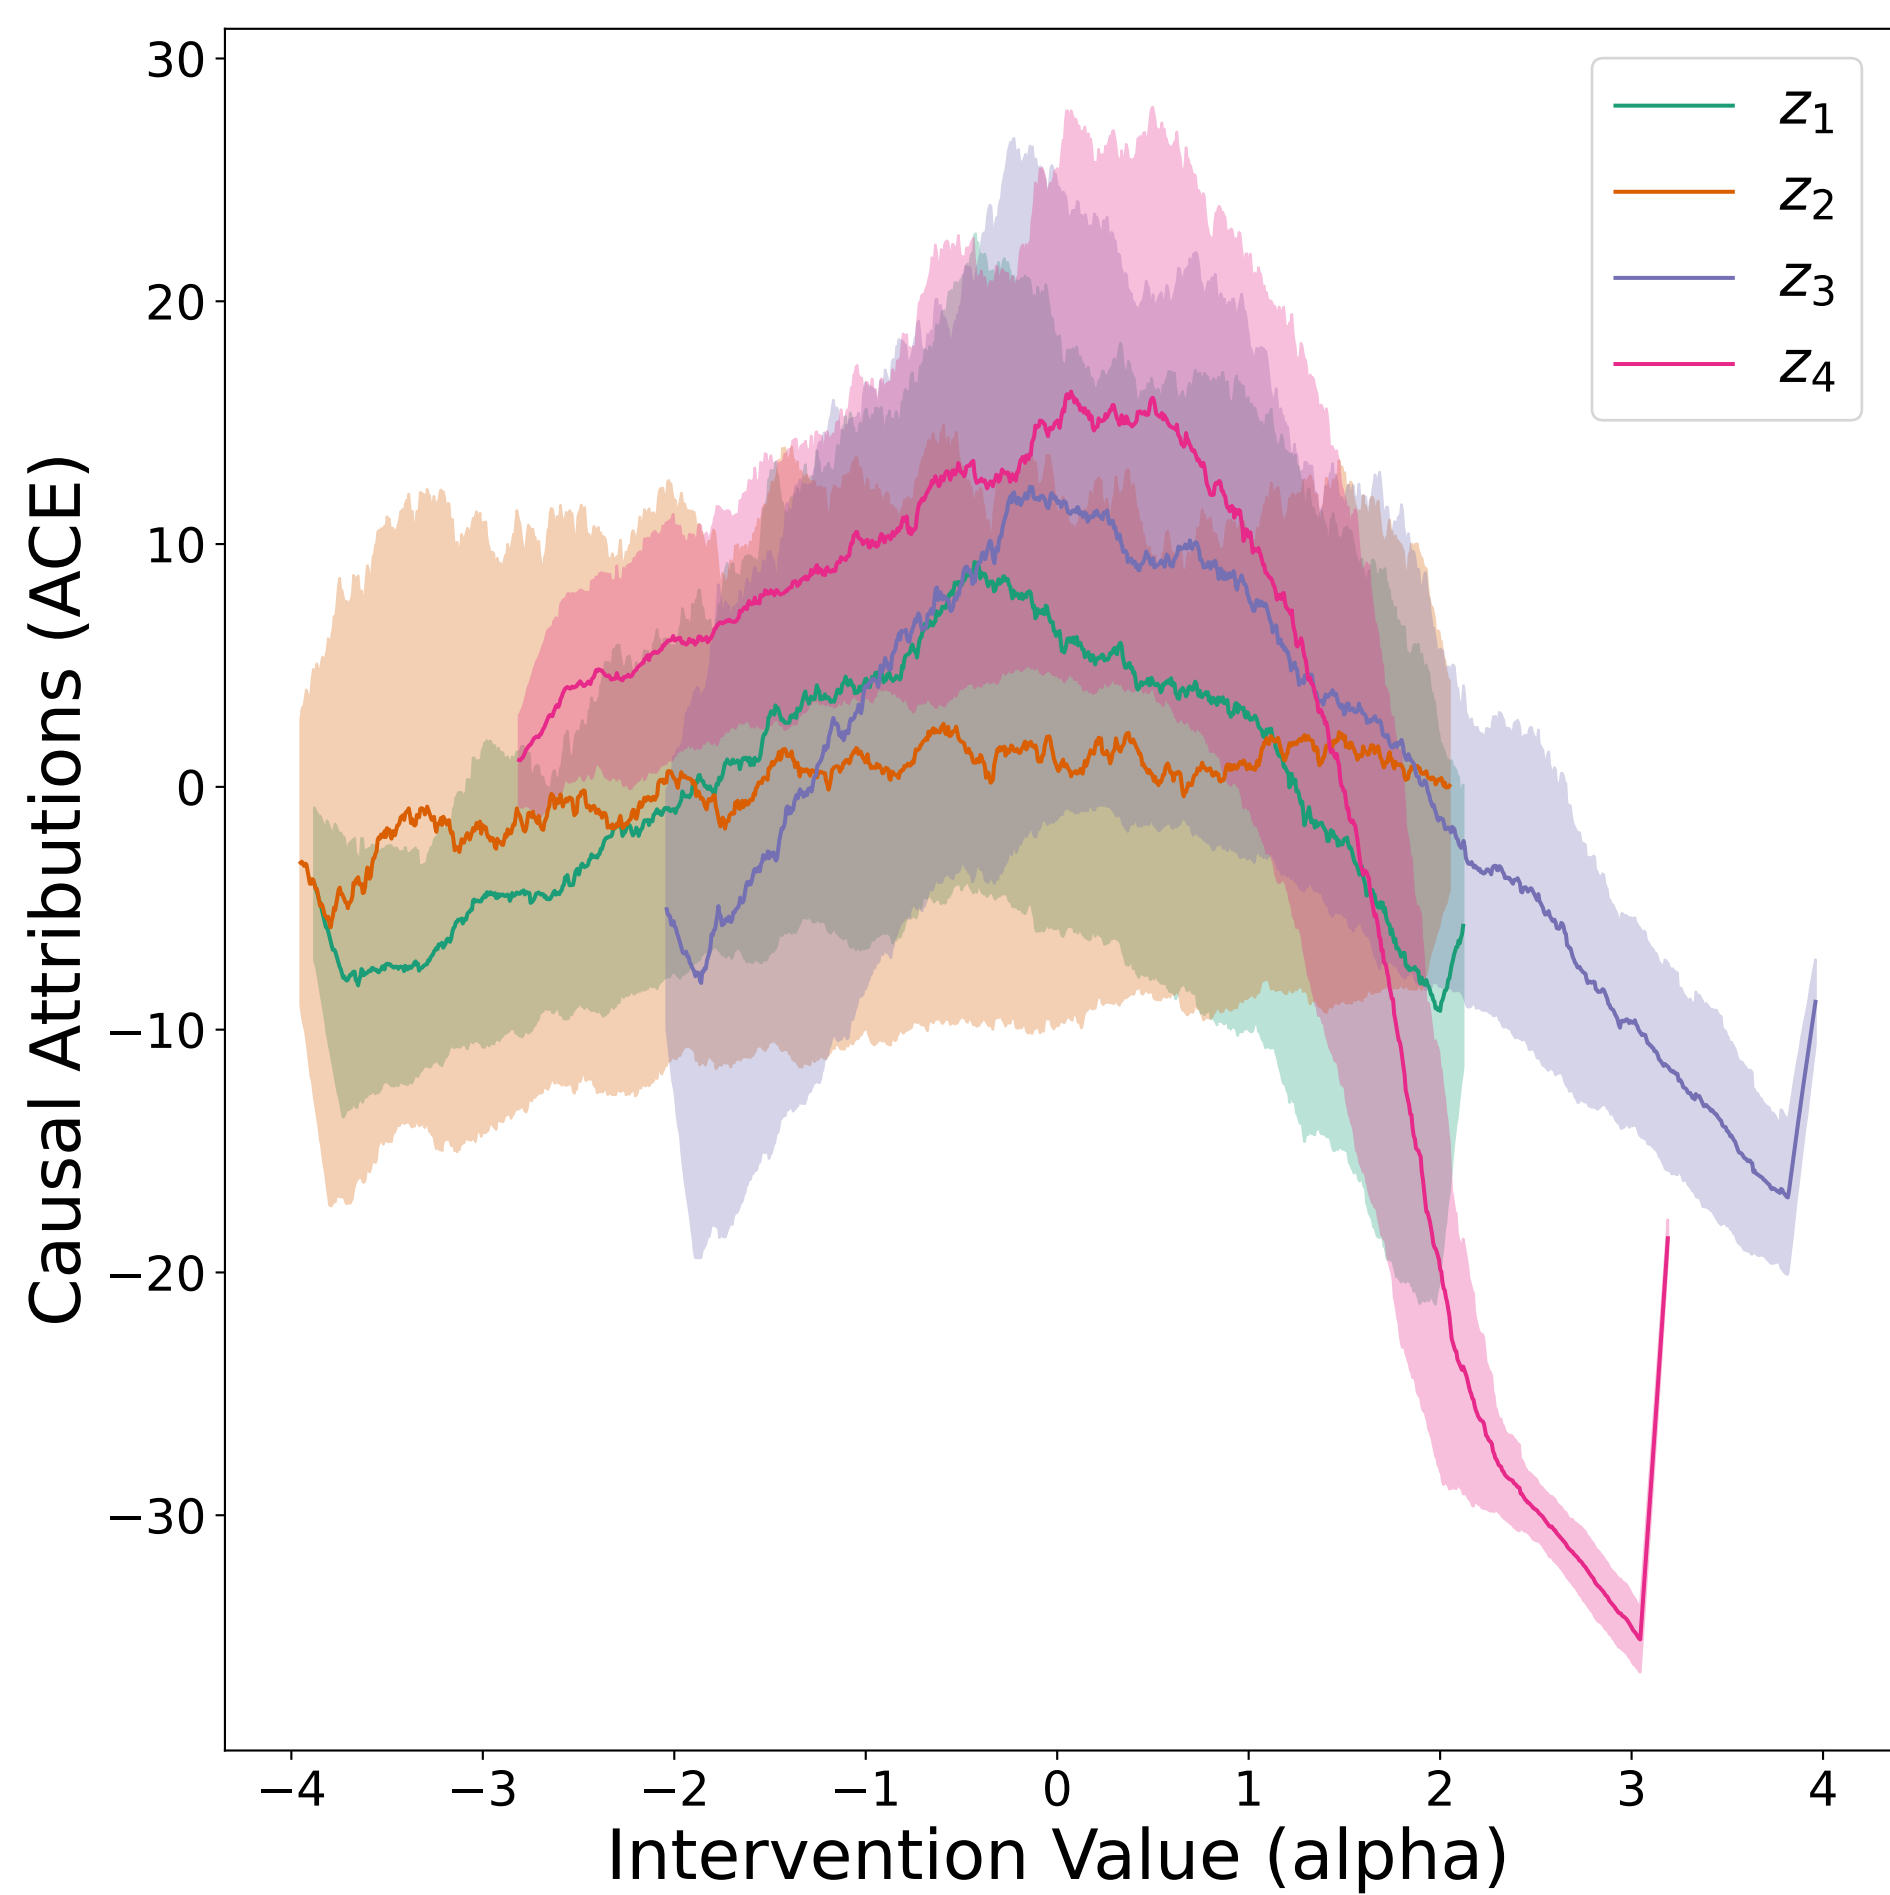

Supplement: supplementary_material [file attachment]

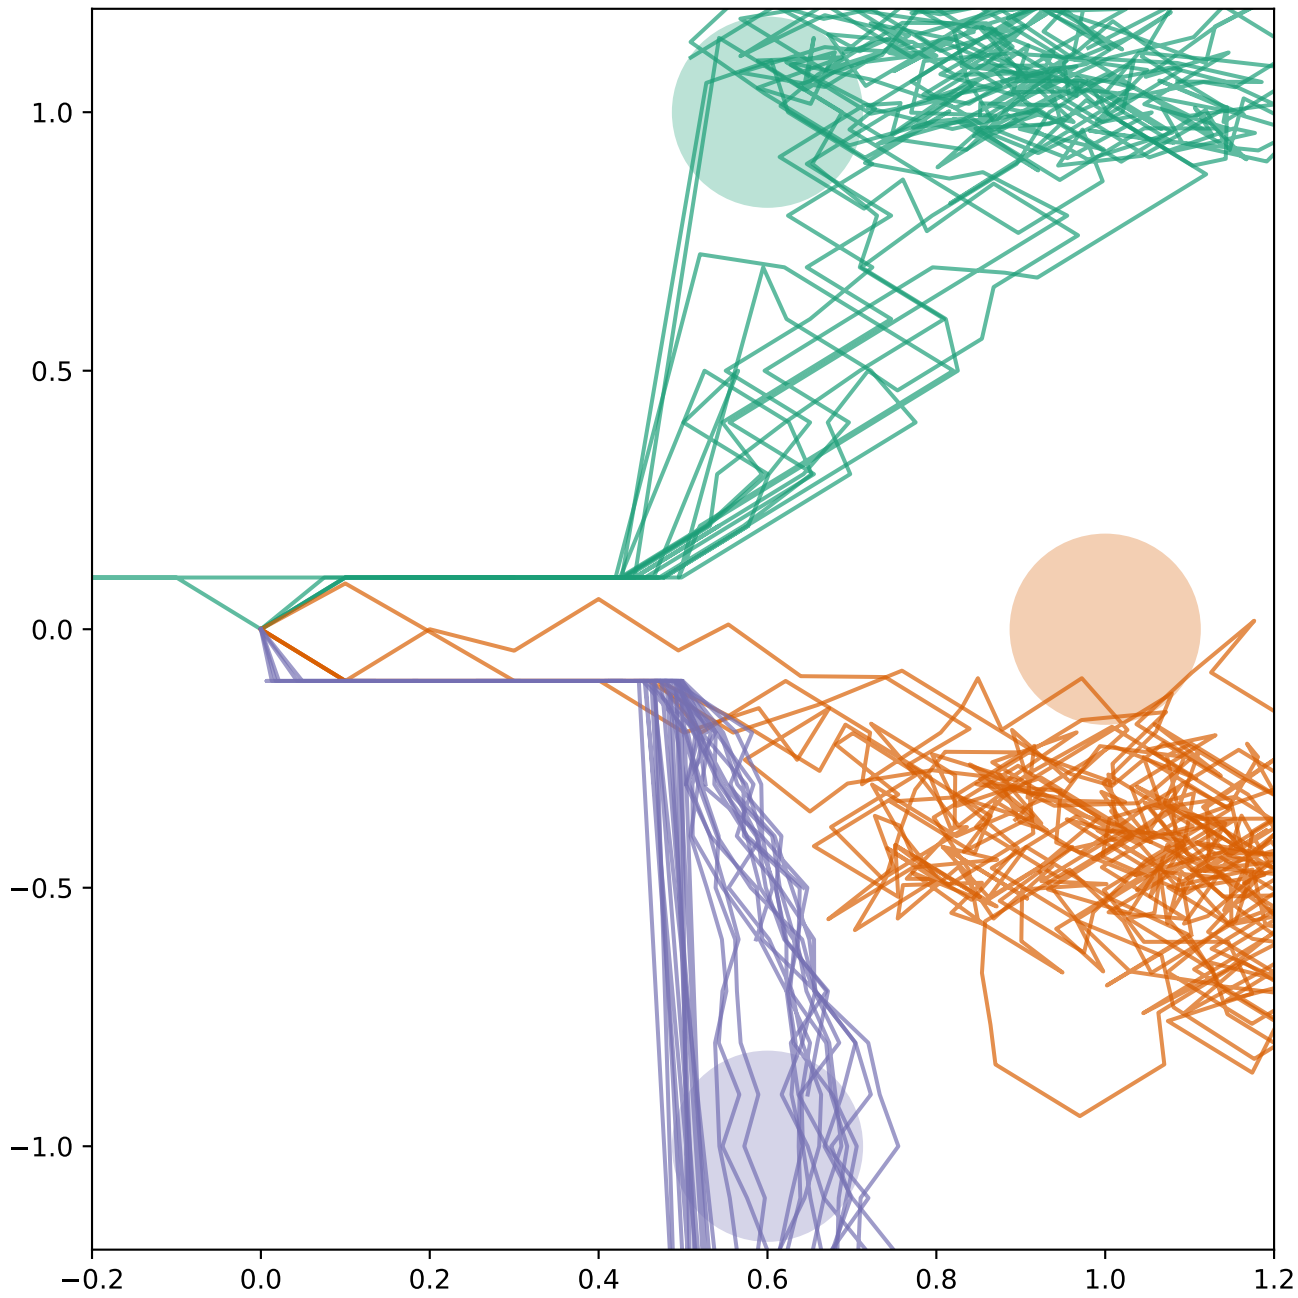

Supplement: supplementary_material [file attachment]

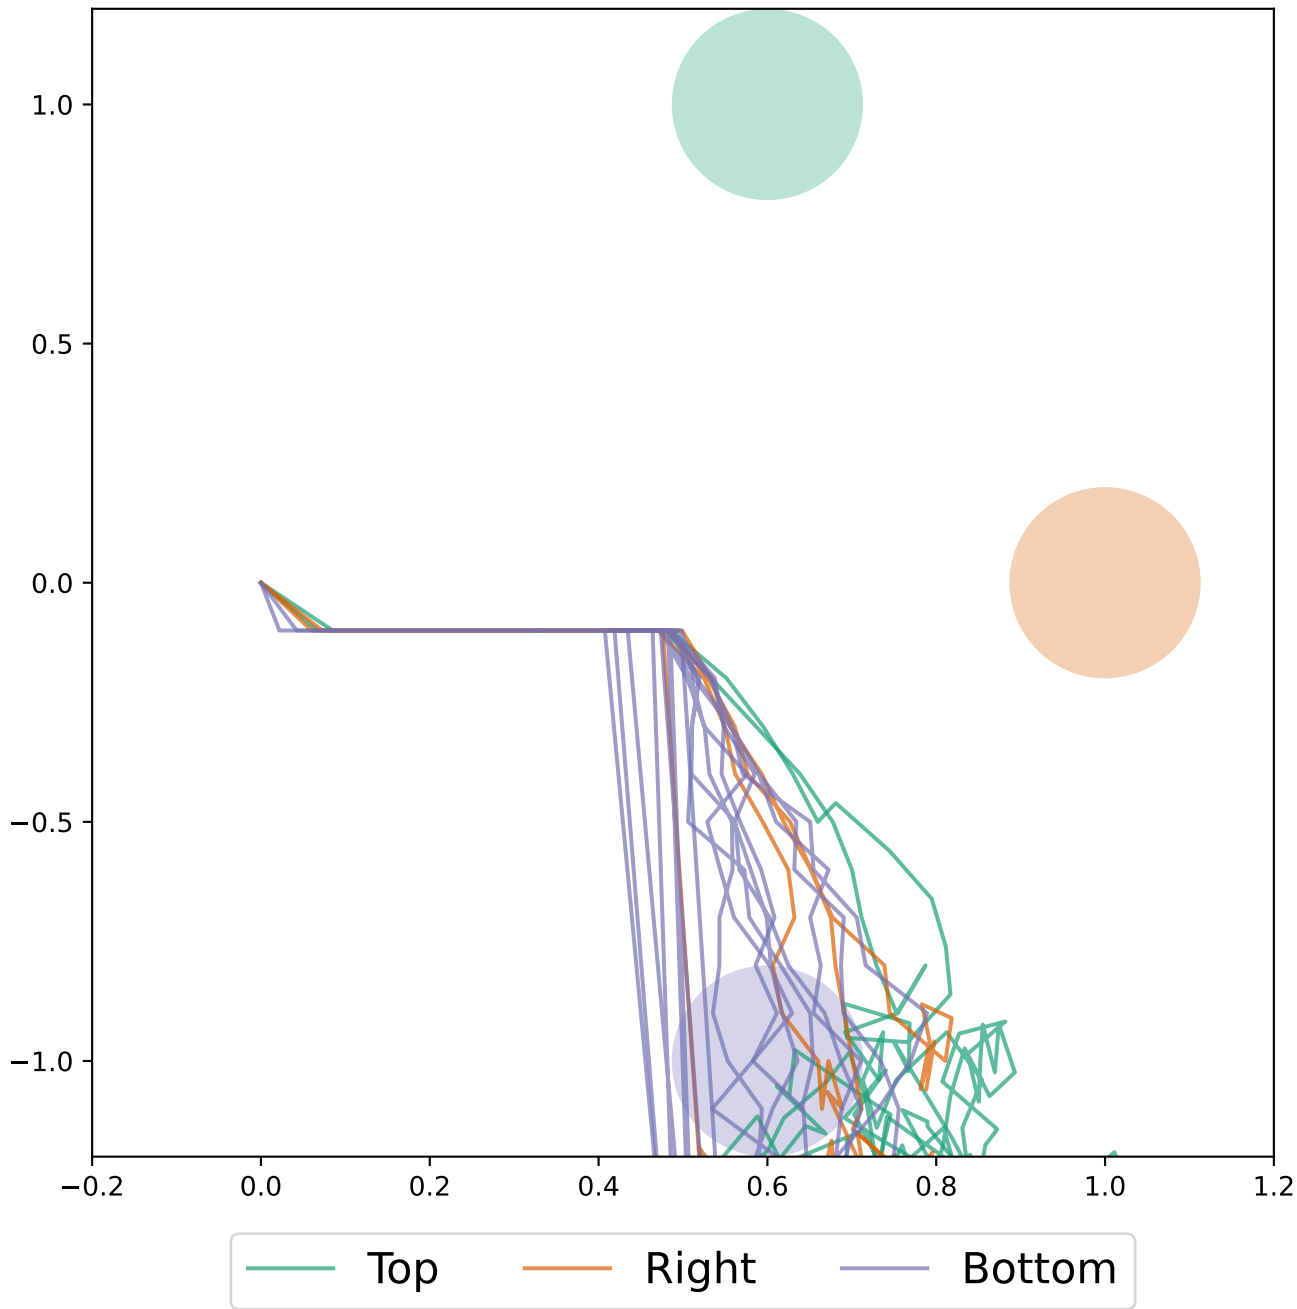

Supplement: supplementary_material [file attachment]

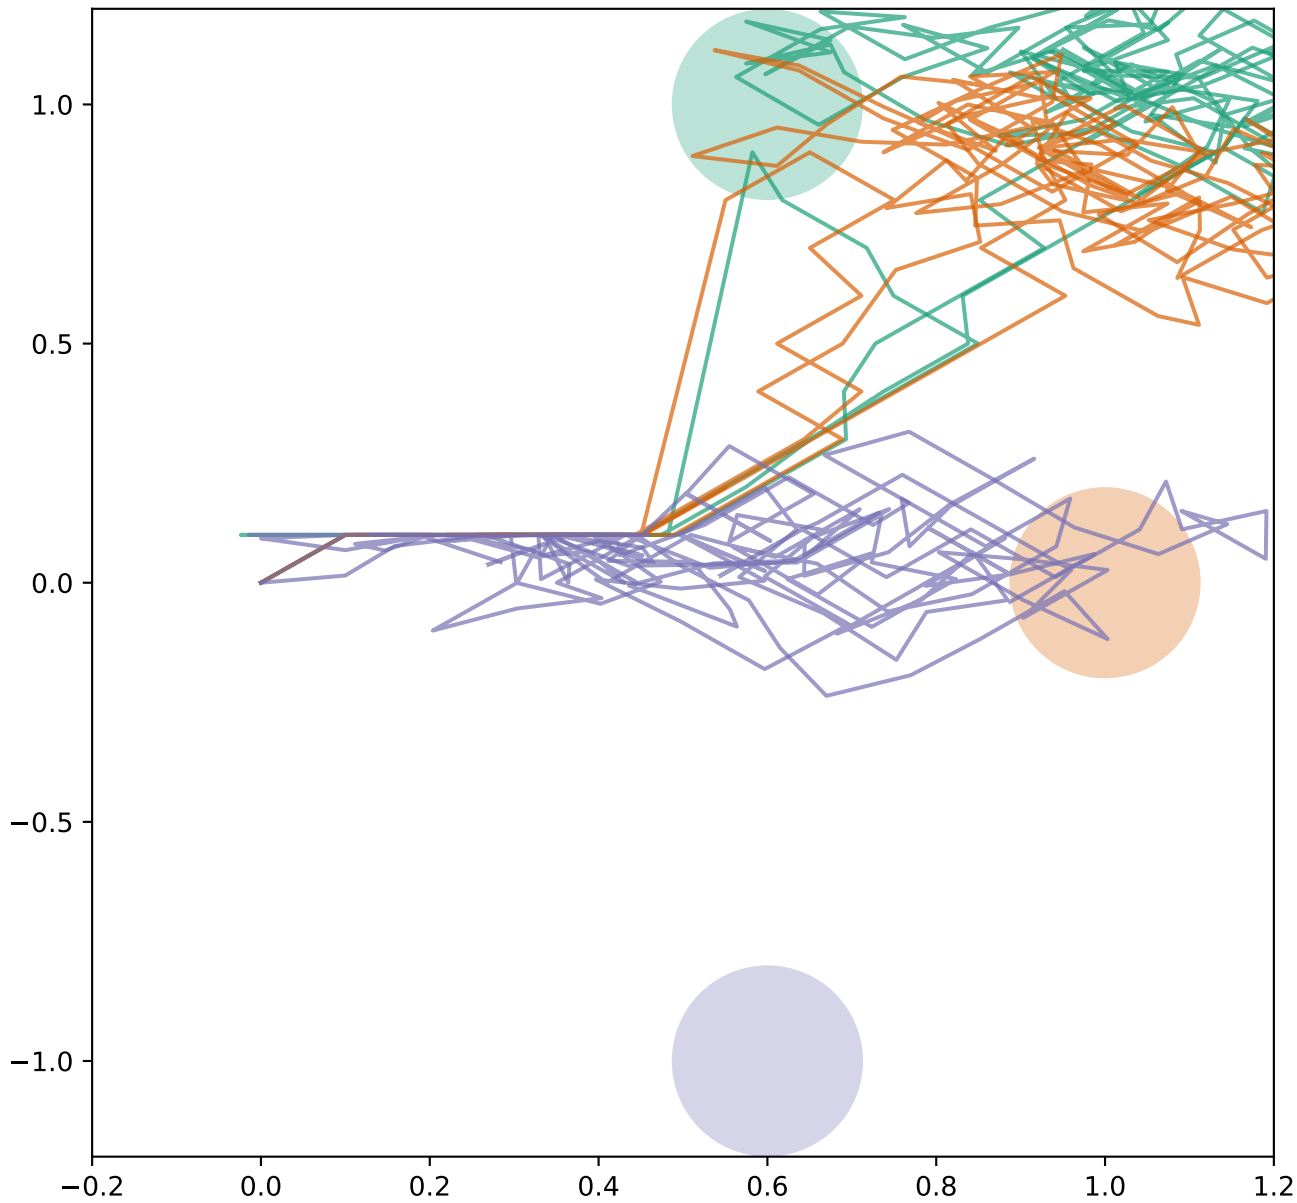

Top Right Bottom

Supplement: supplementary_material [file attachment]

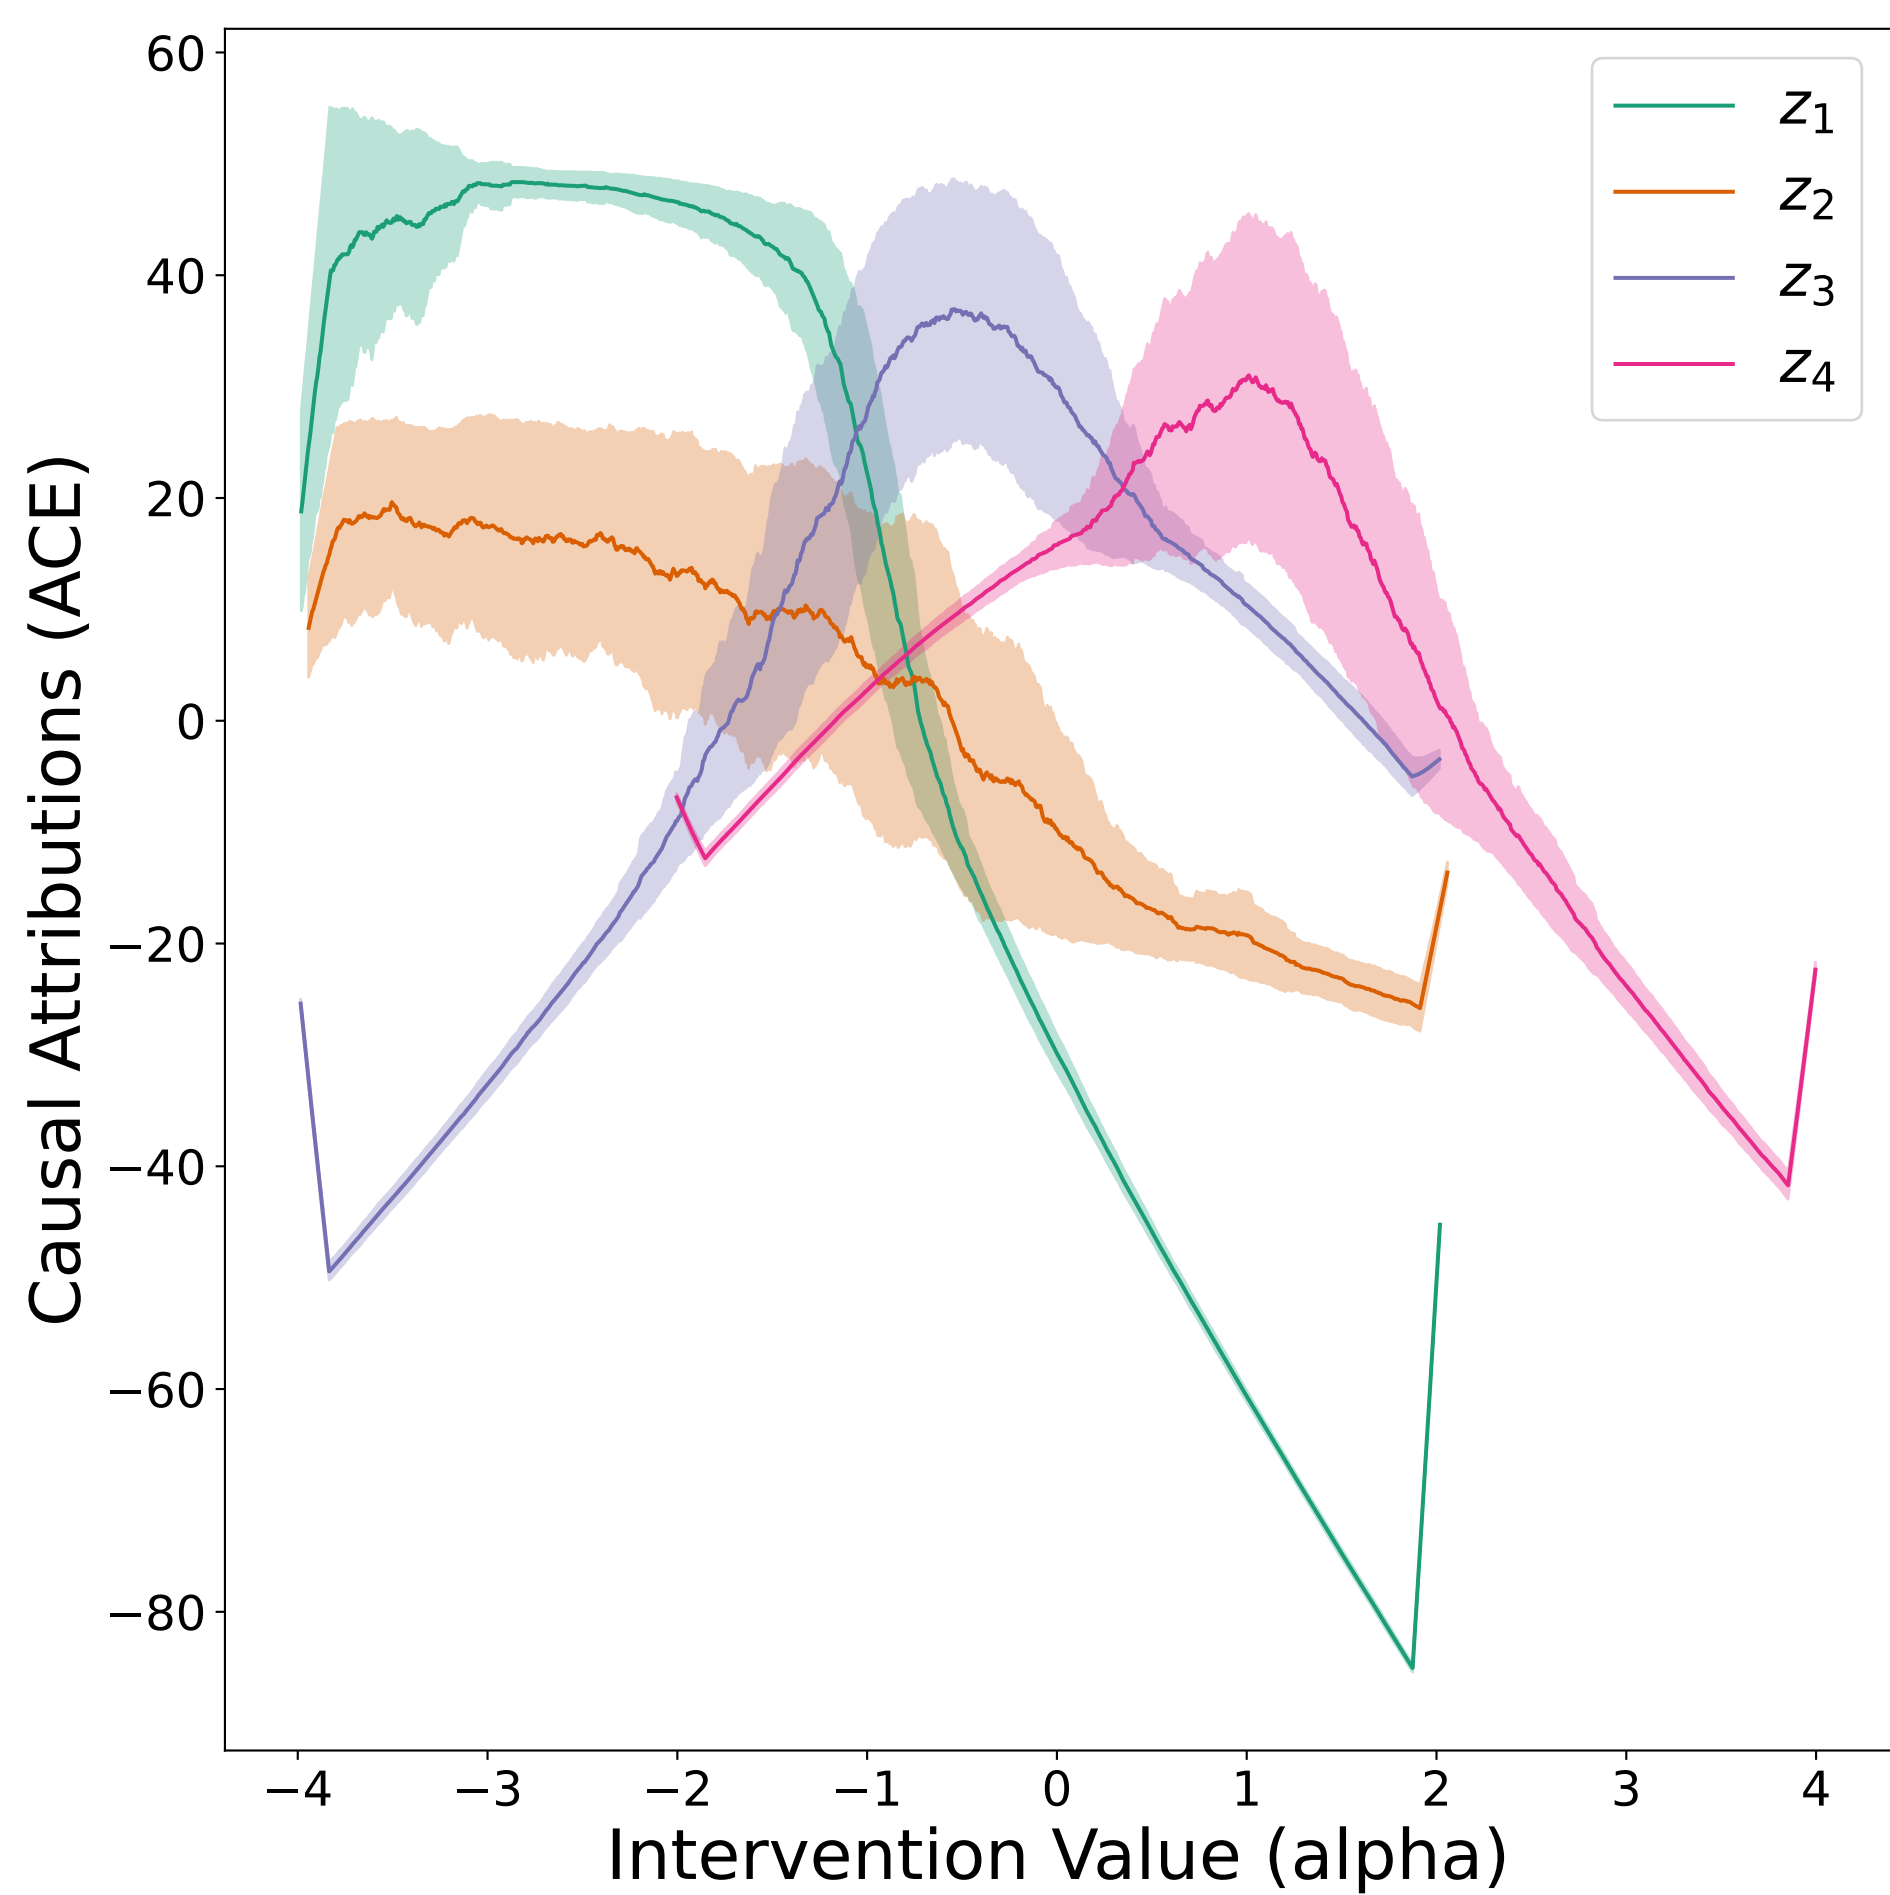

Supplement: supplementary_material [file attachment]

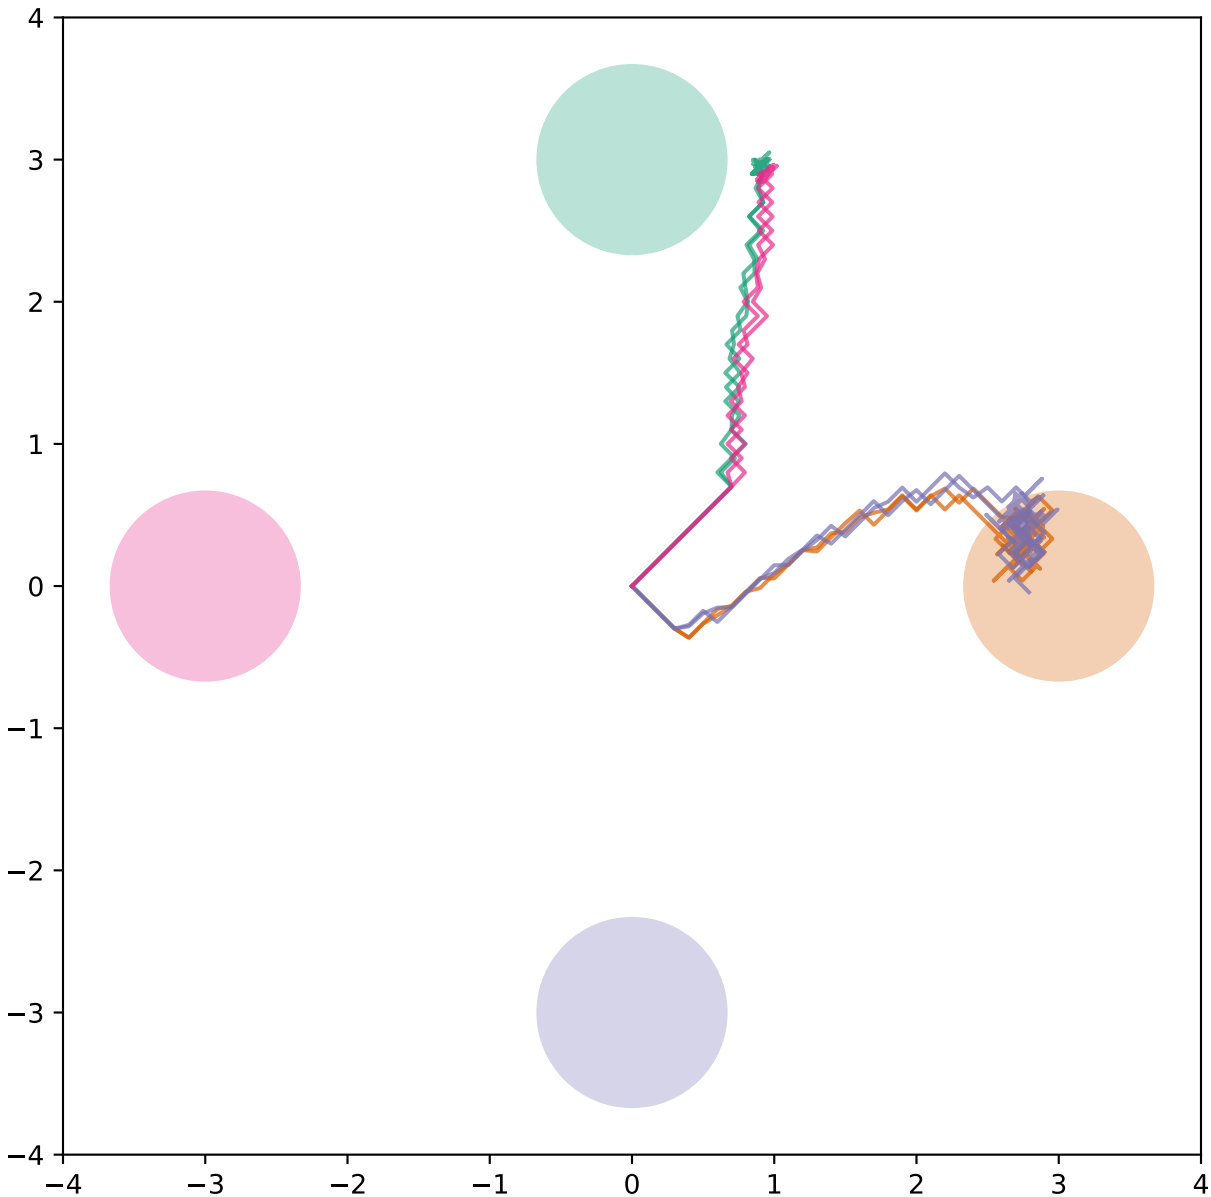

Top Right Bottom Left

Supplement: supplementary_material [file attachment]

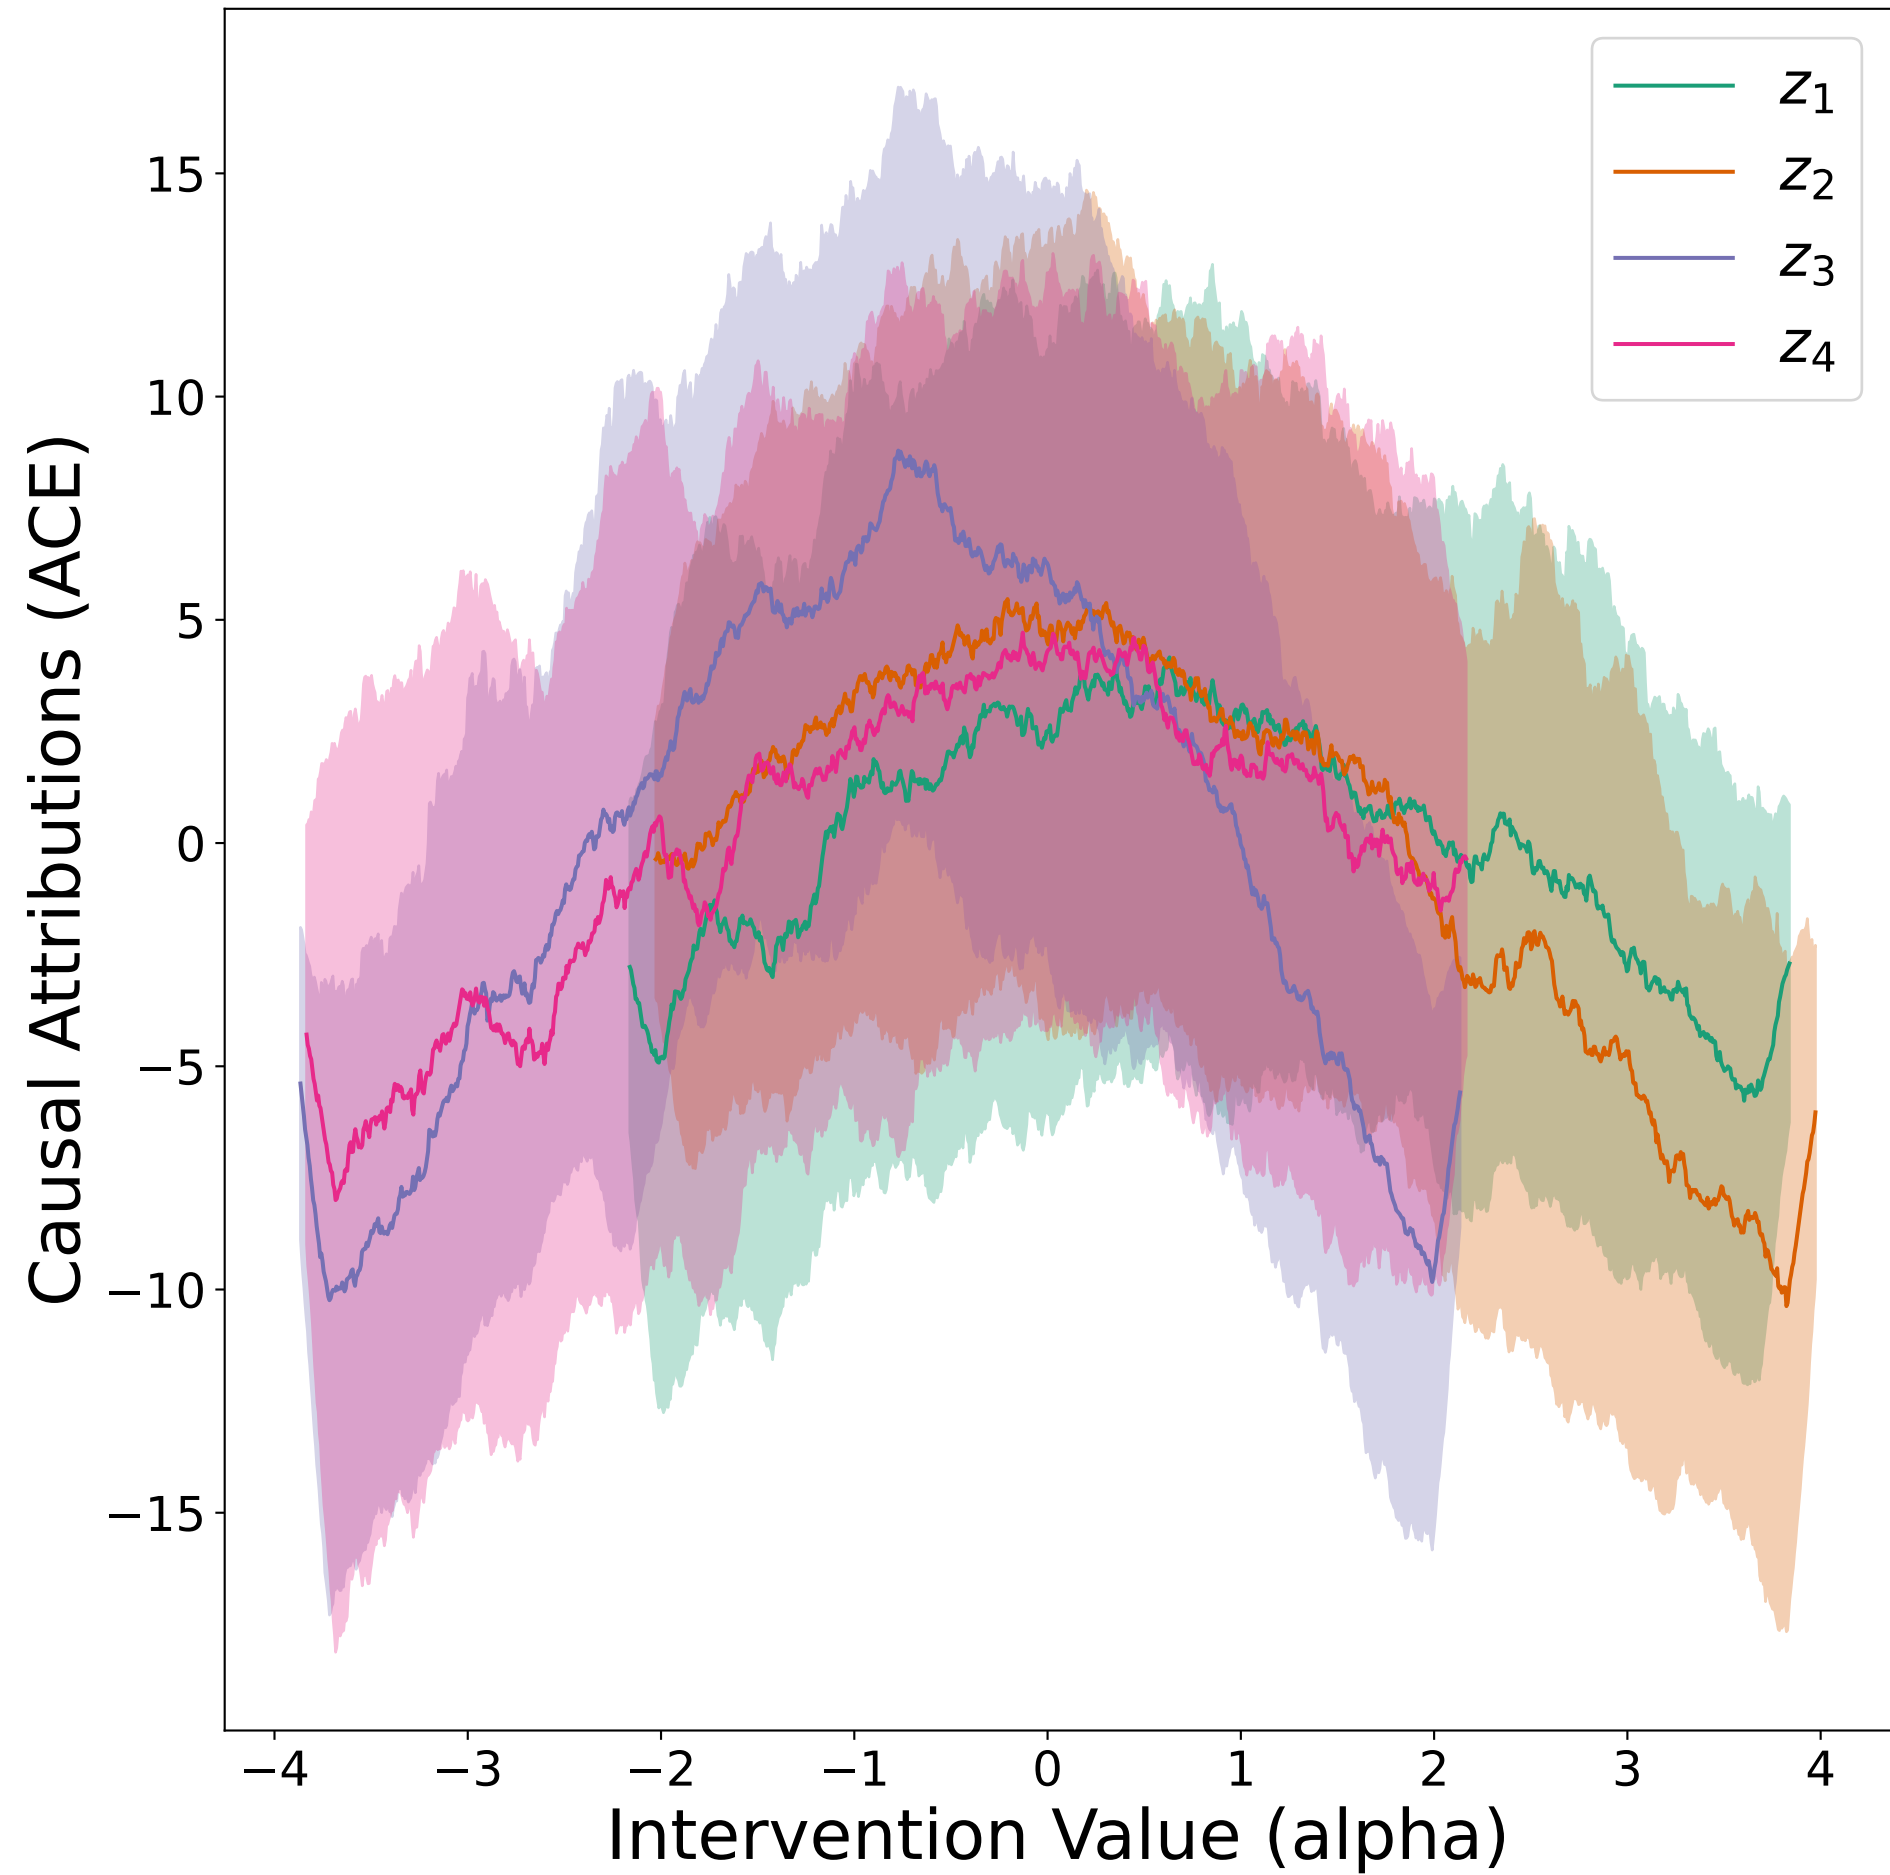

Supplement: supplementary_material [file attachment]

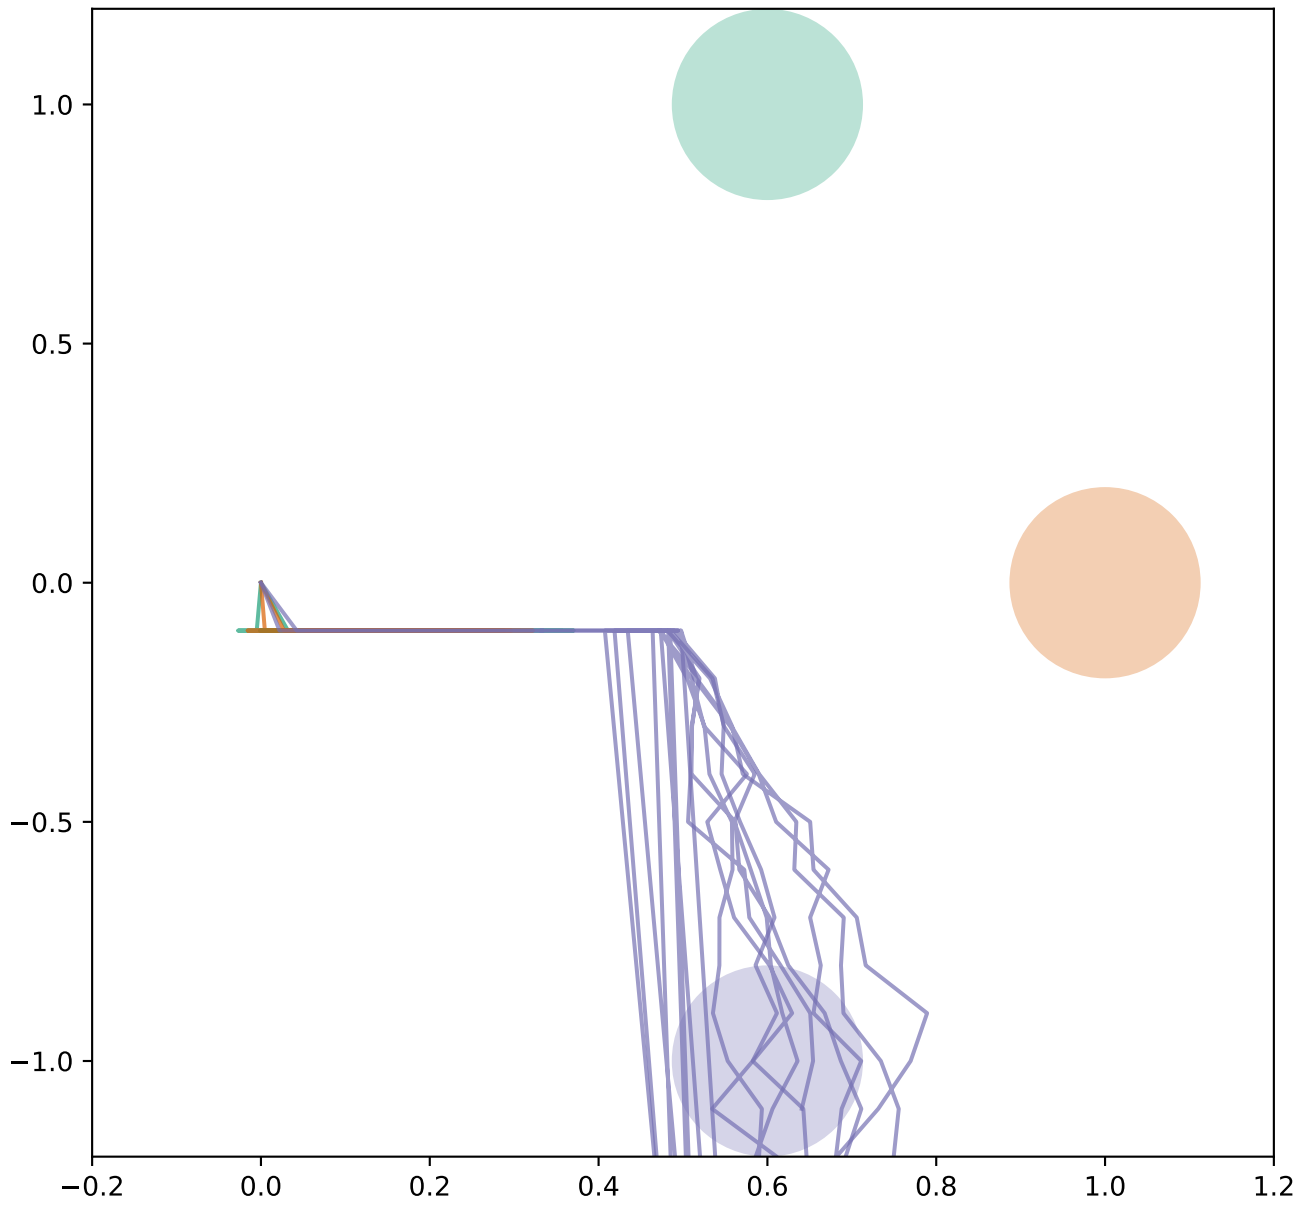

Top Right Bottom

Supplement: supplementary_material [file attachment]

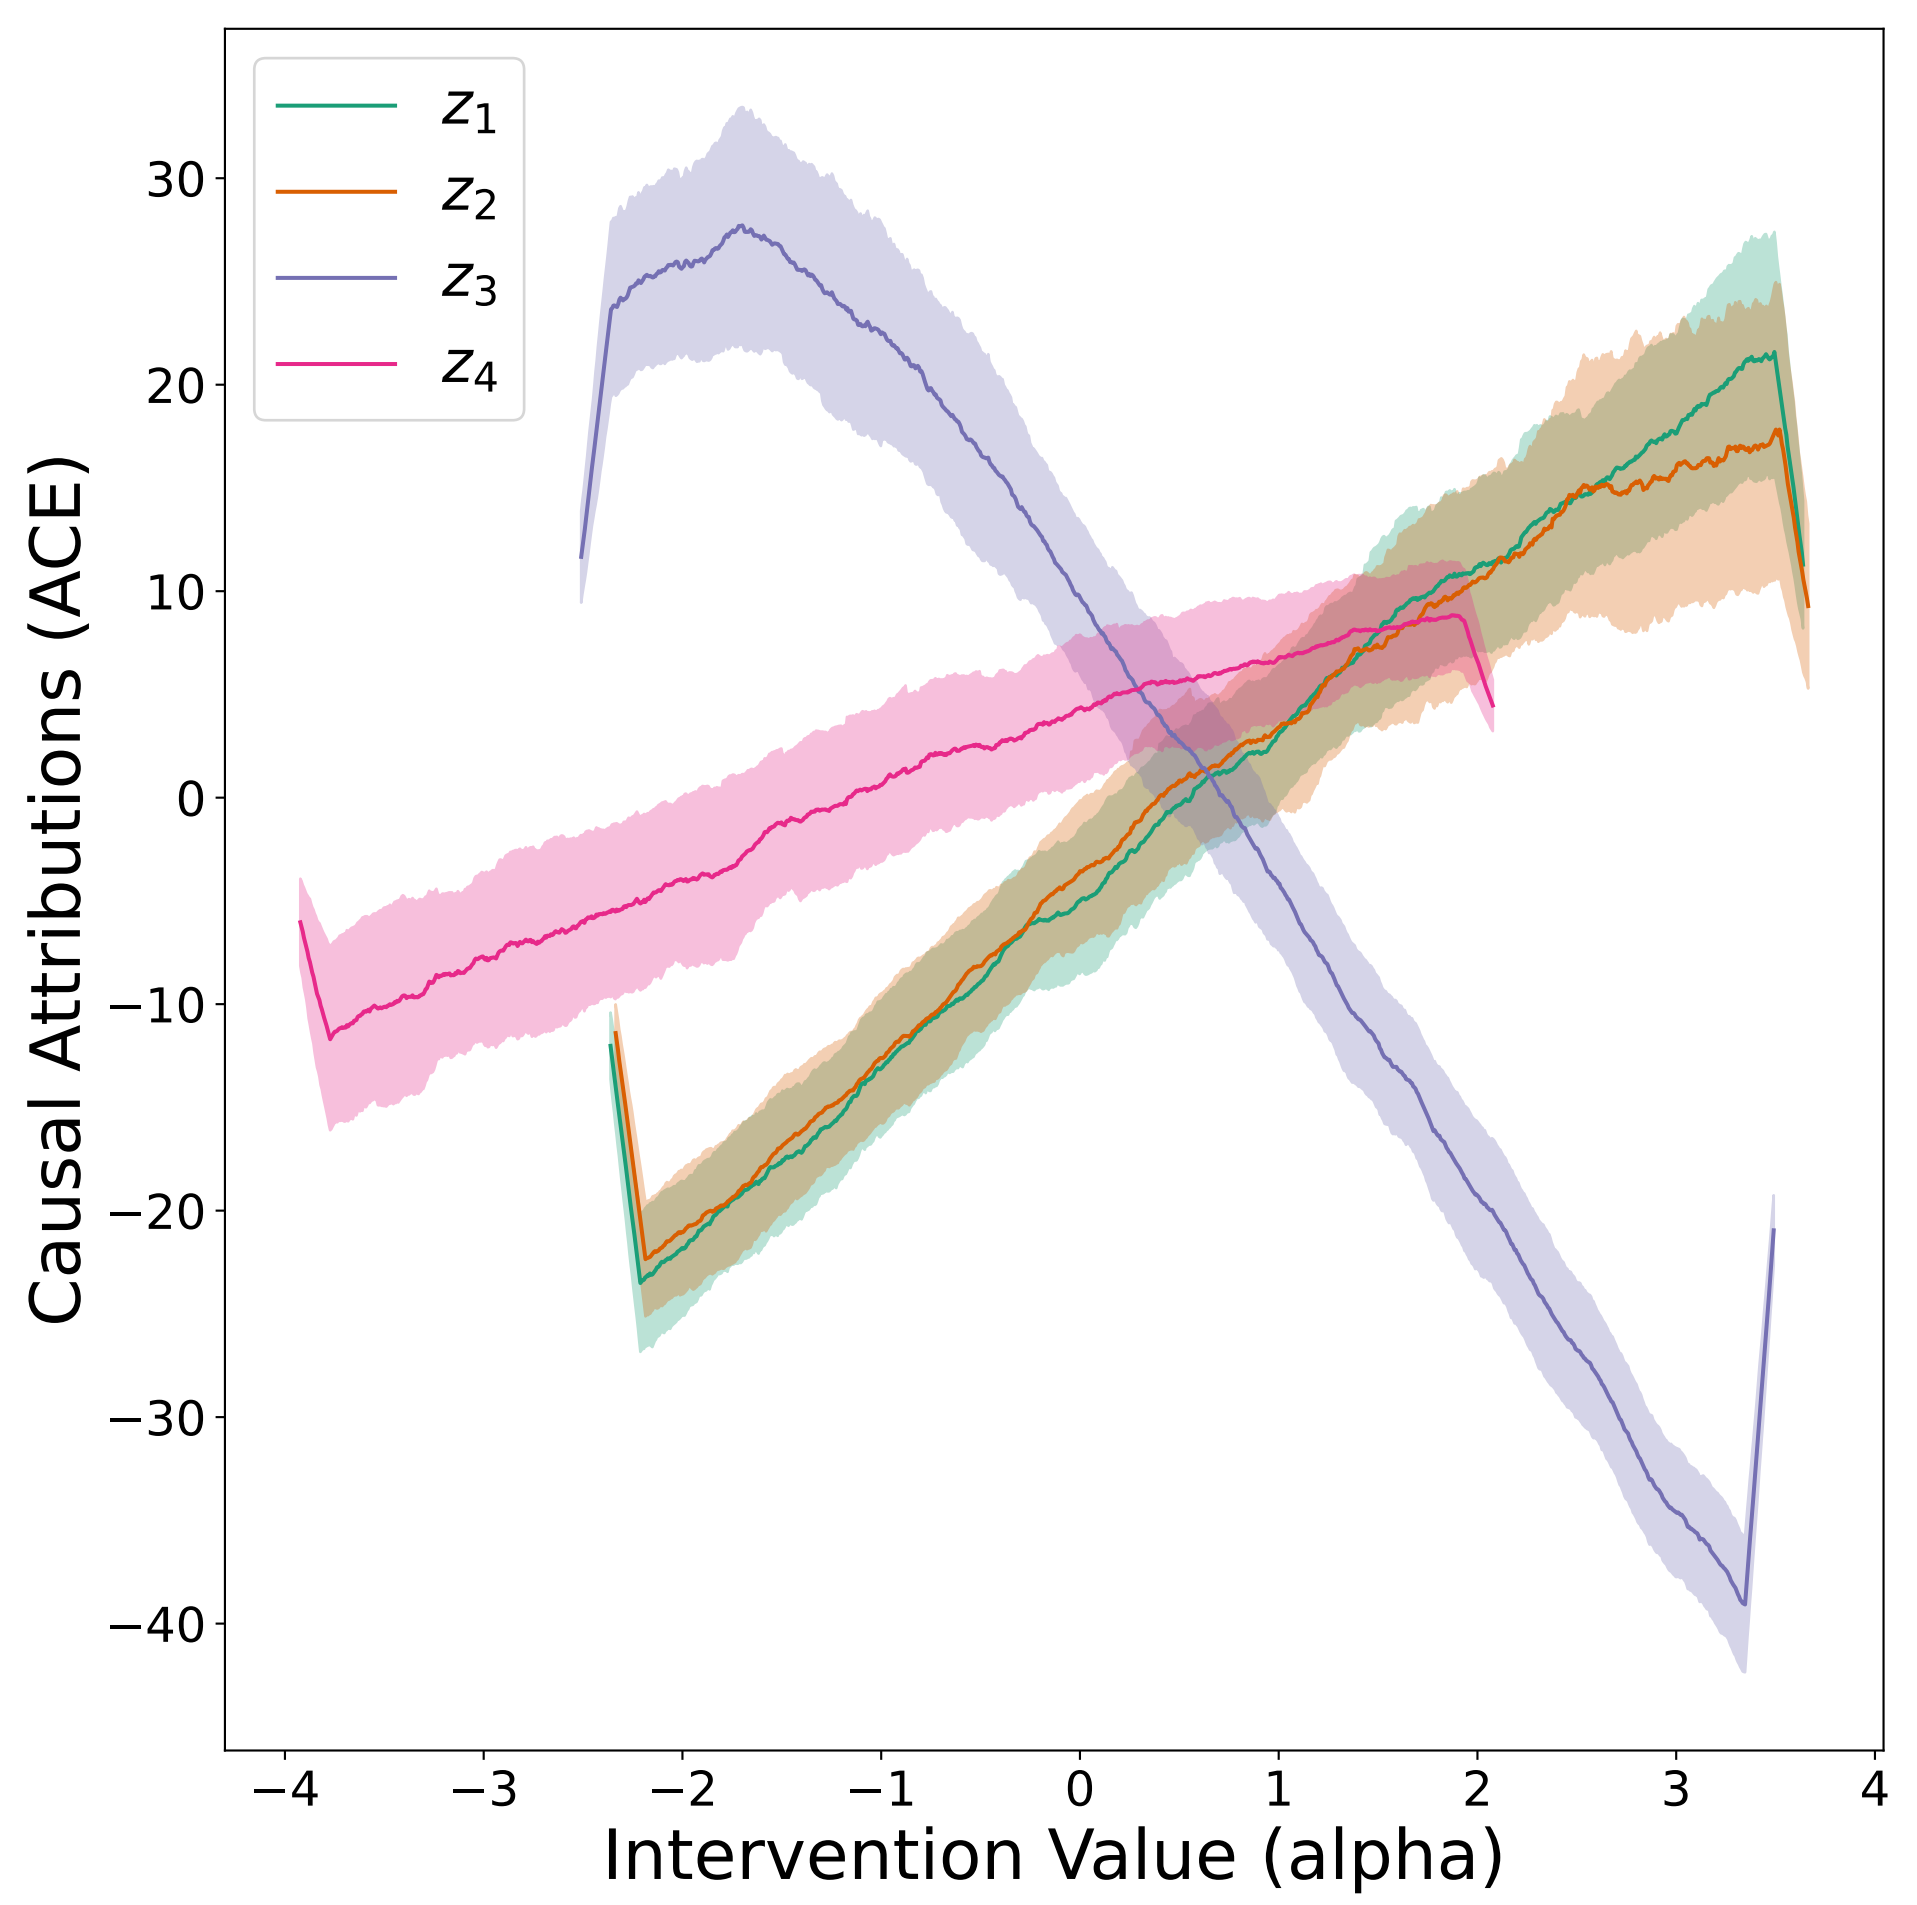

Supplement: supplementary_material [file attachment]

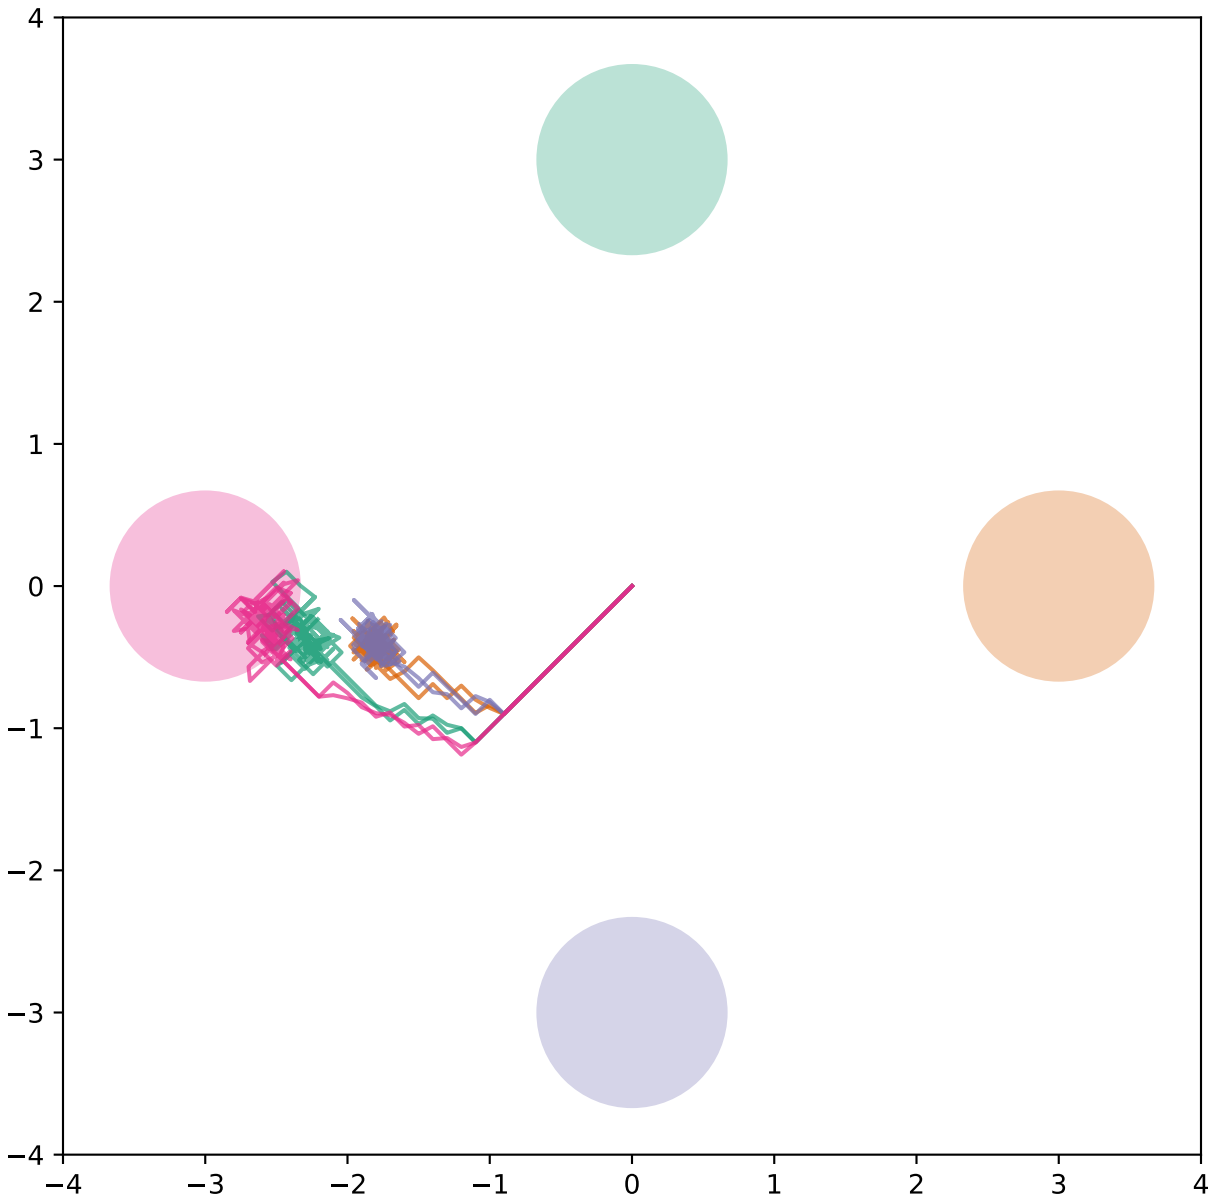

— Top — Right — Bottom — Left

Supplement: supplementary_material [file attachment]

Average importance

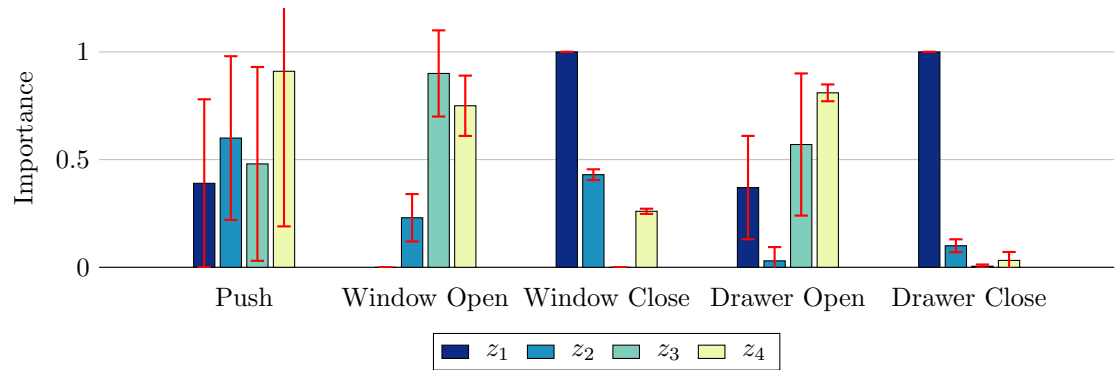

Supplement: supplementary_material [file attachment]

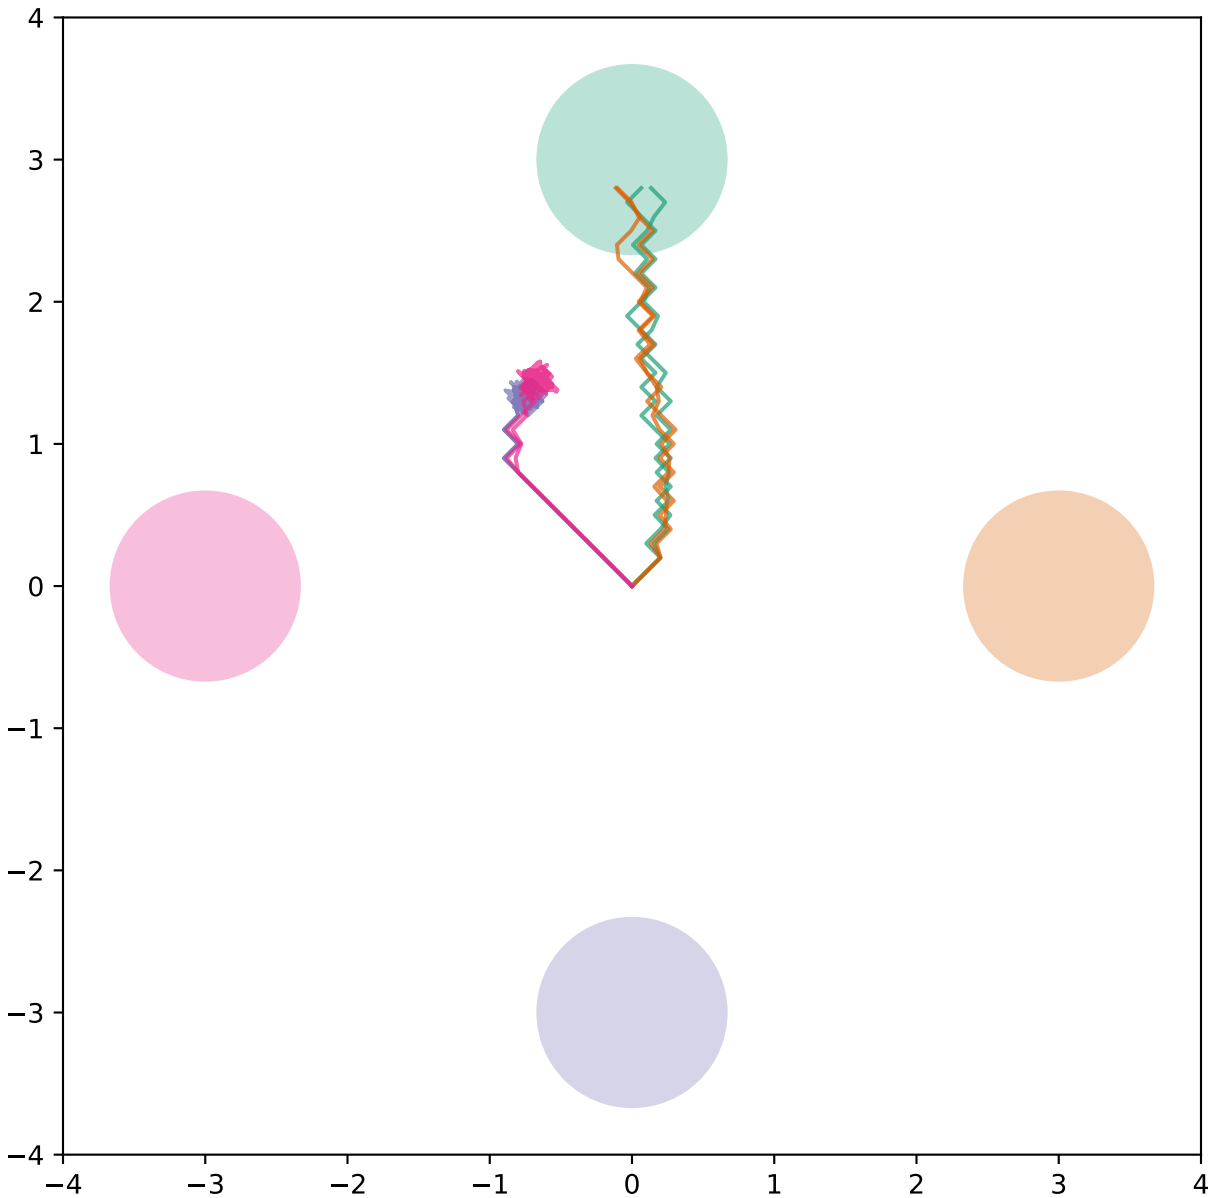

Top Right Bottom Left

Supplement: supplementary_material [file attachment]

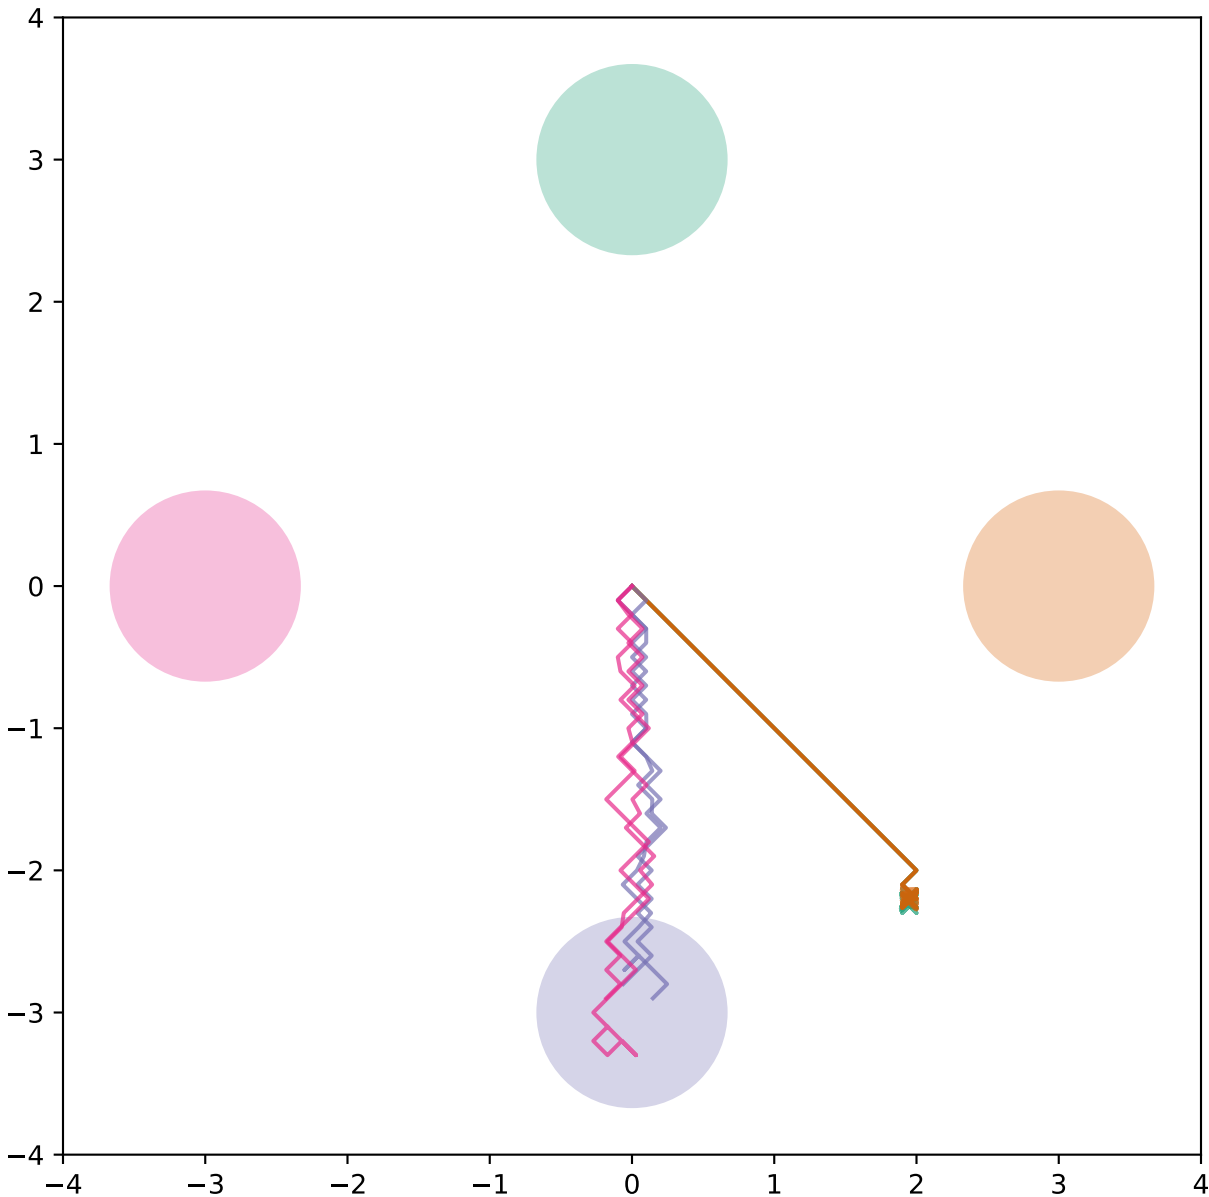

Top

Right

Bottom

Left

Top

Right

Bottom

Left

Supplement: supplementary_material [file attachment]

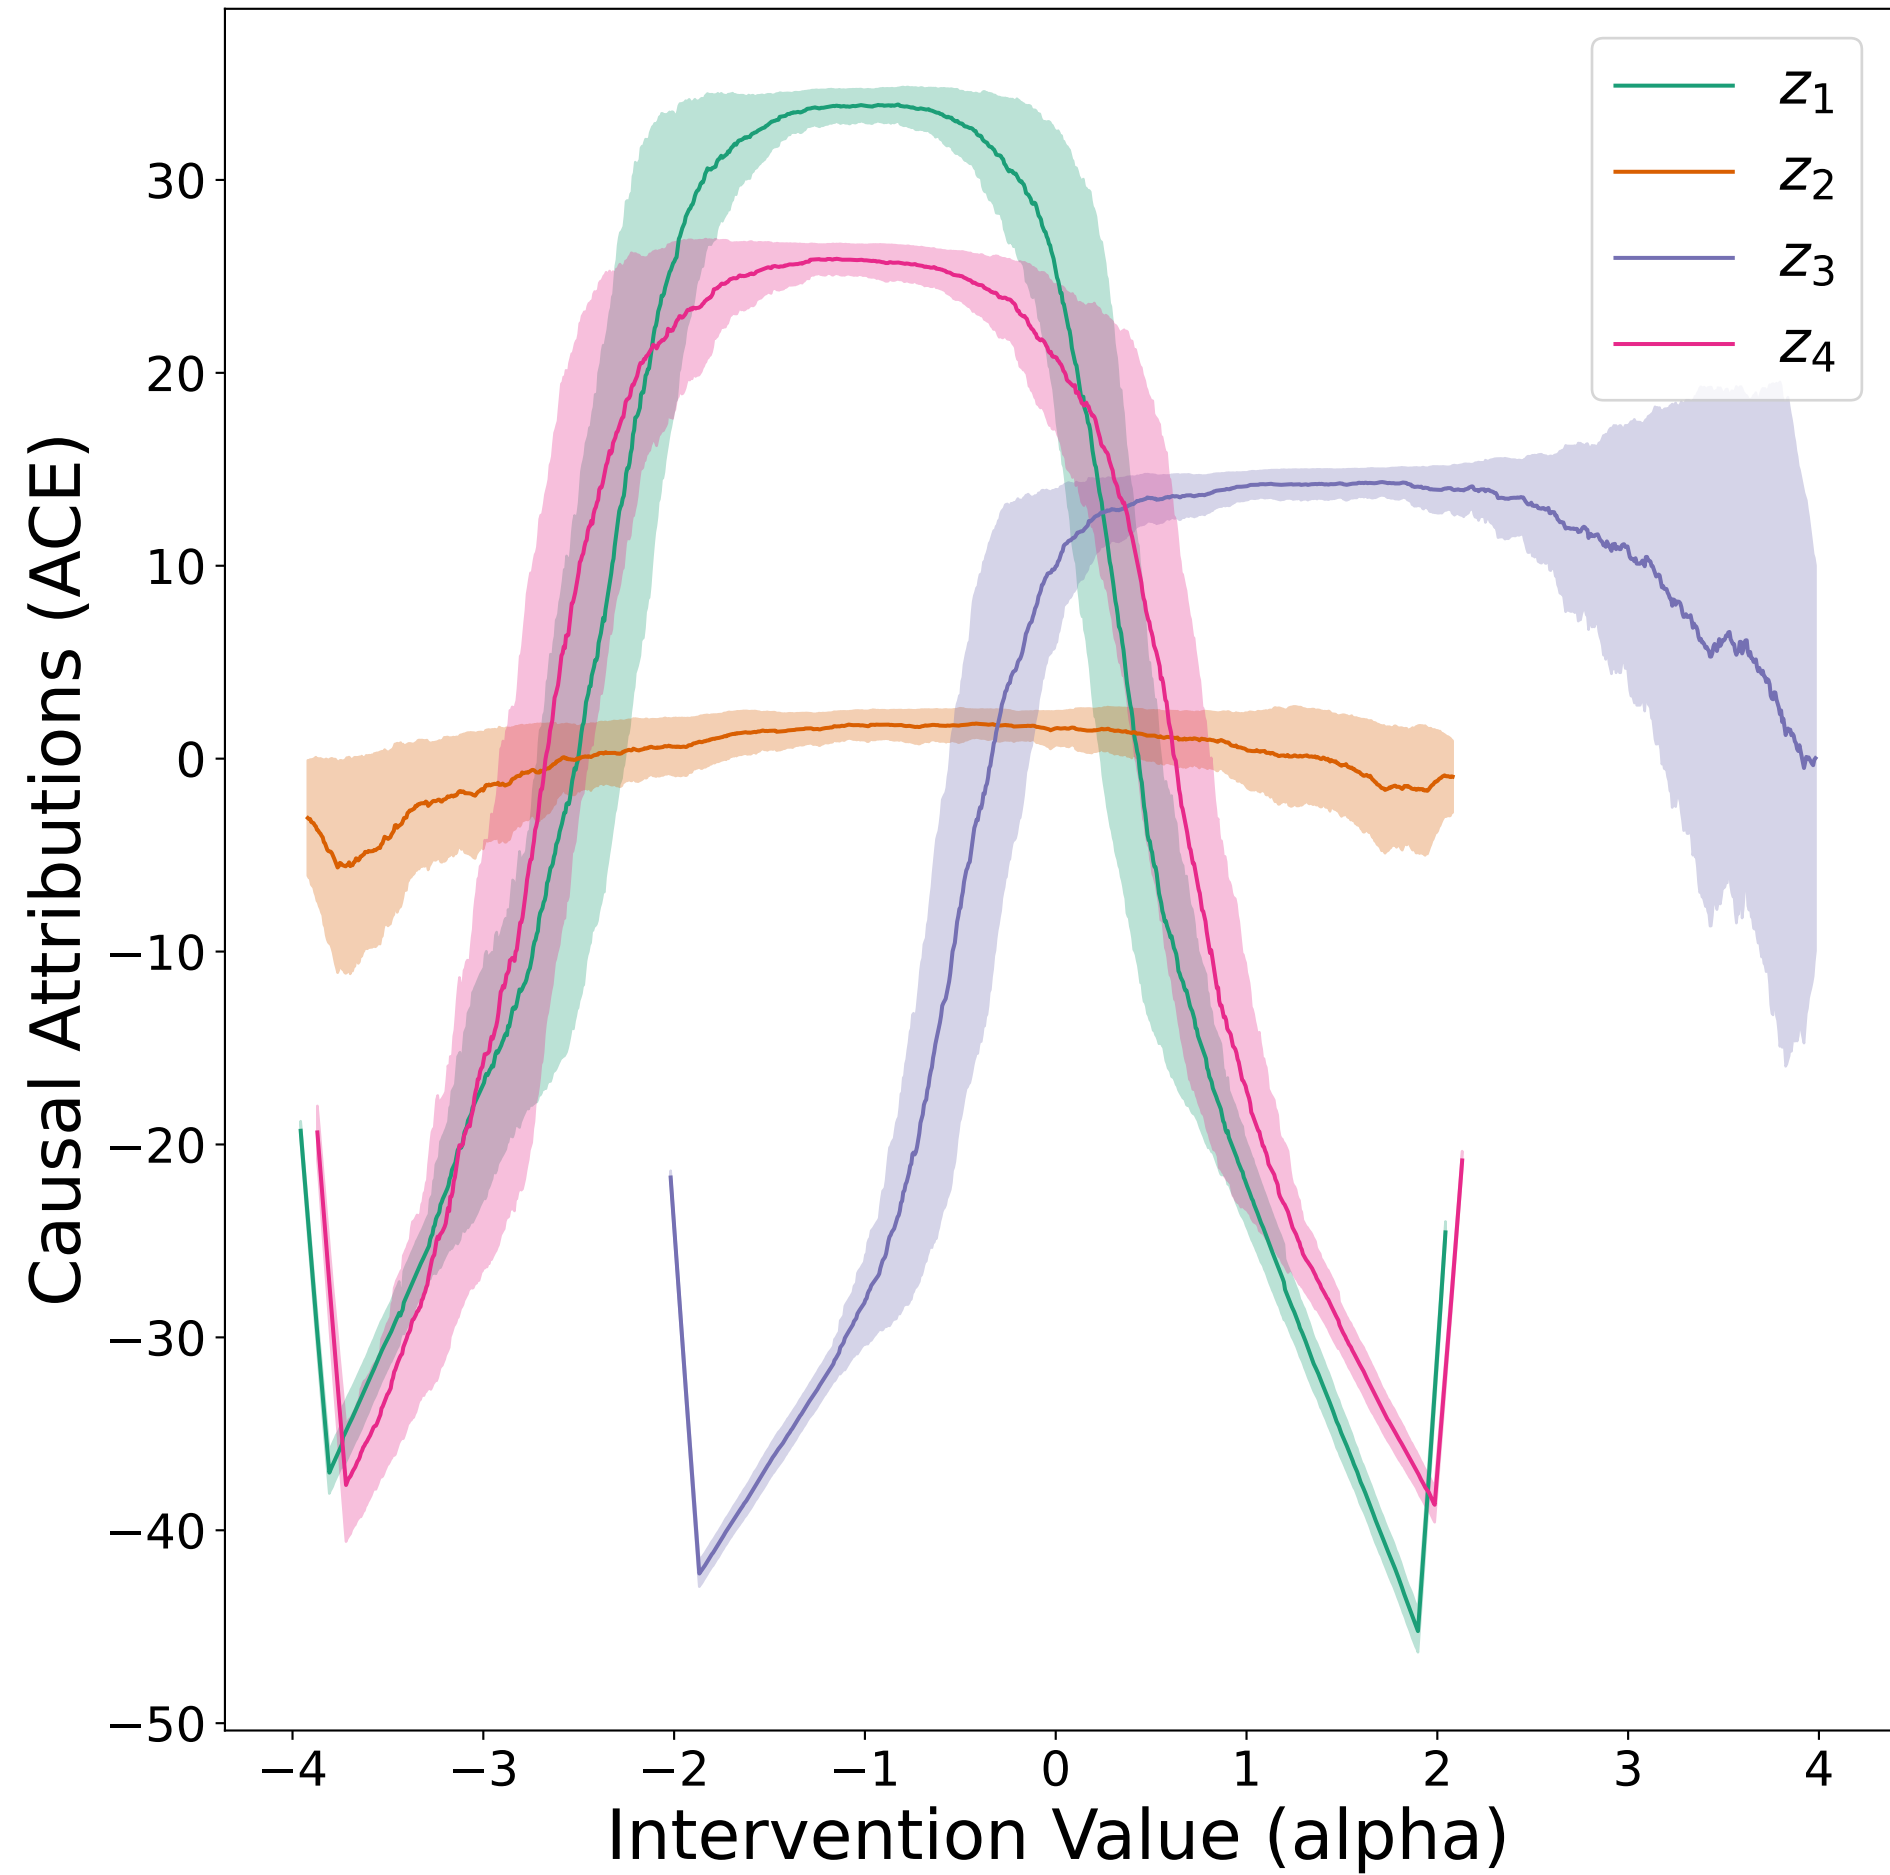

Supplement: supplementary_material [file attachment]

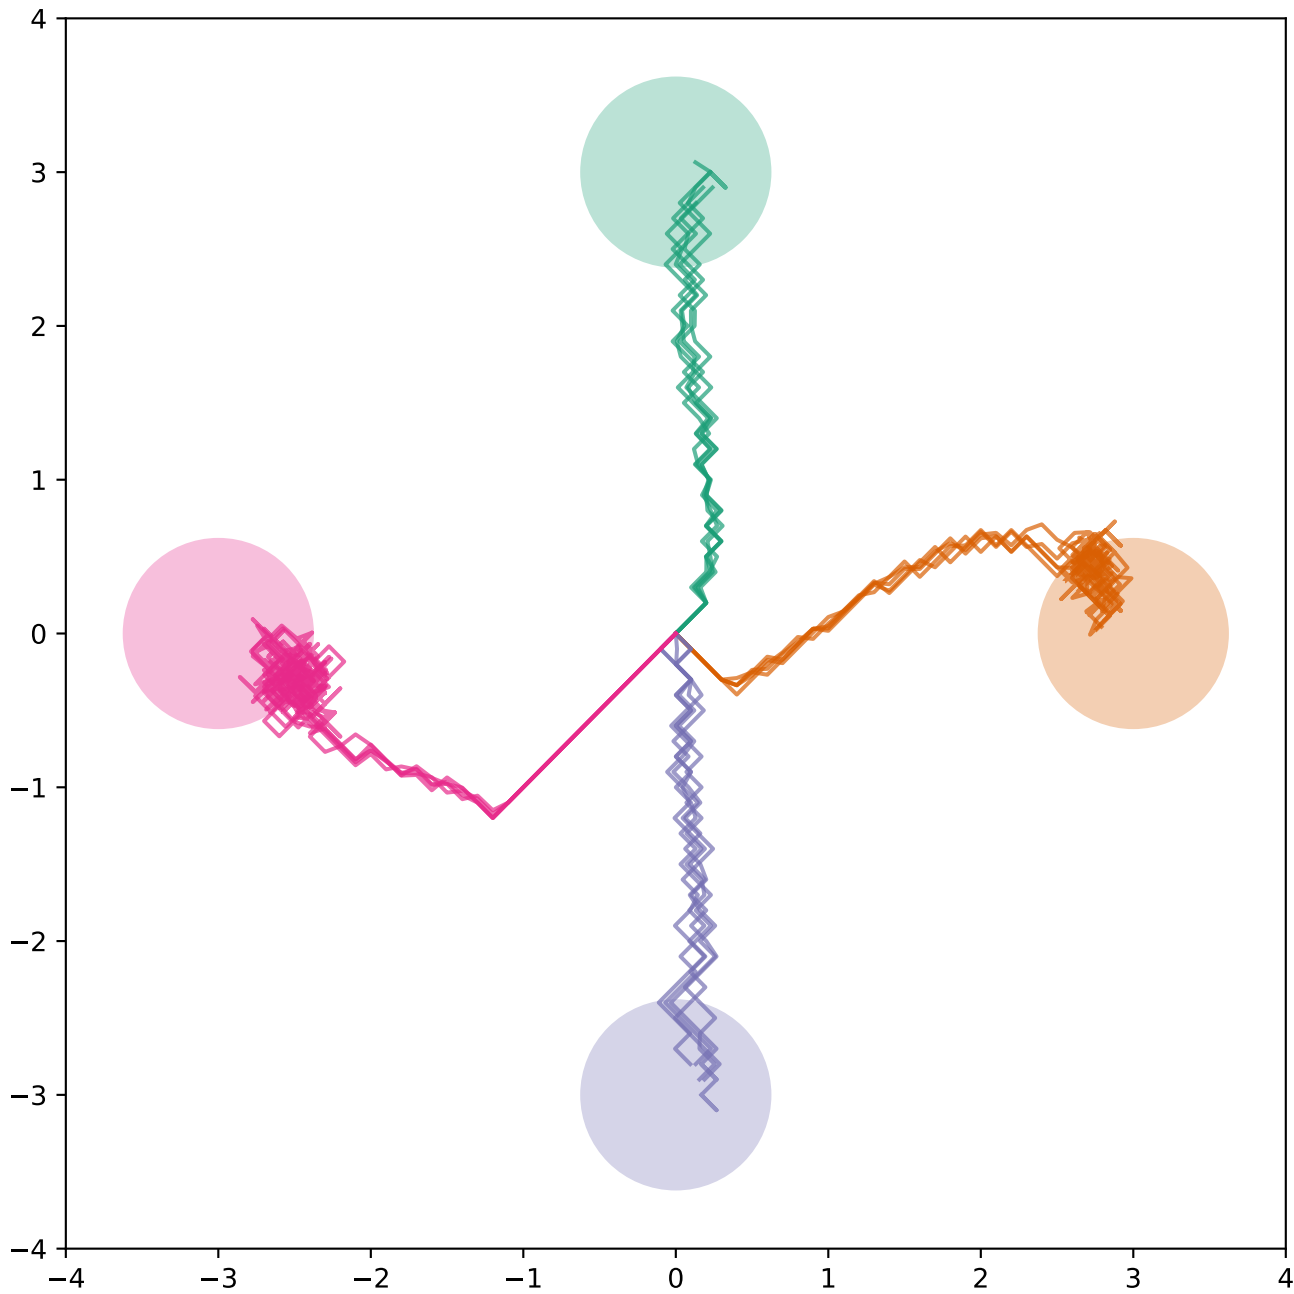

Supplement: supplementary_material [file attachment]

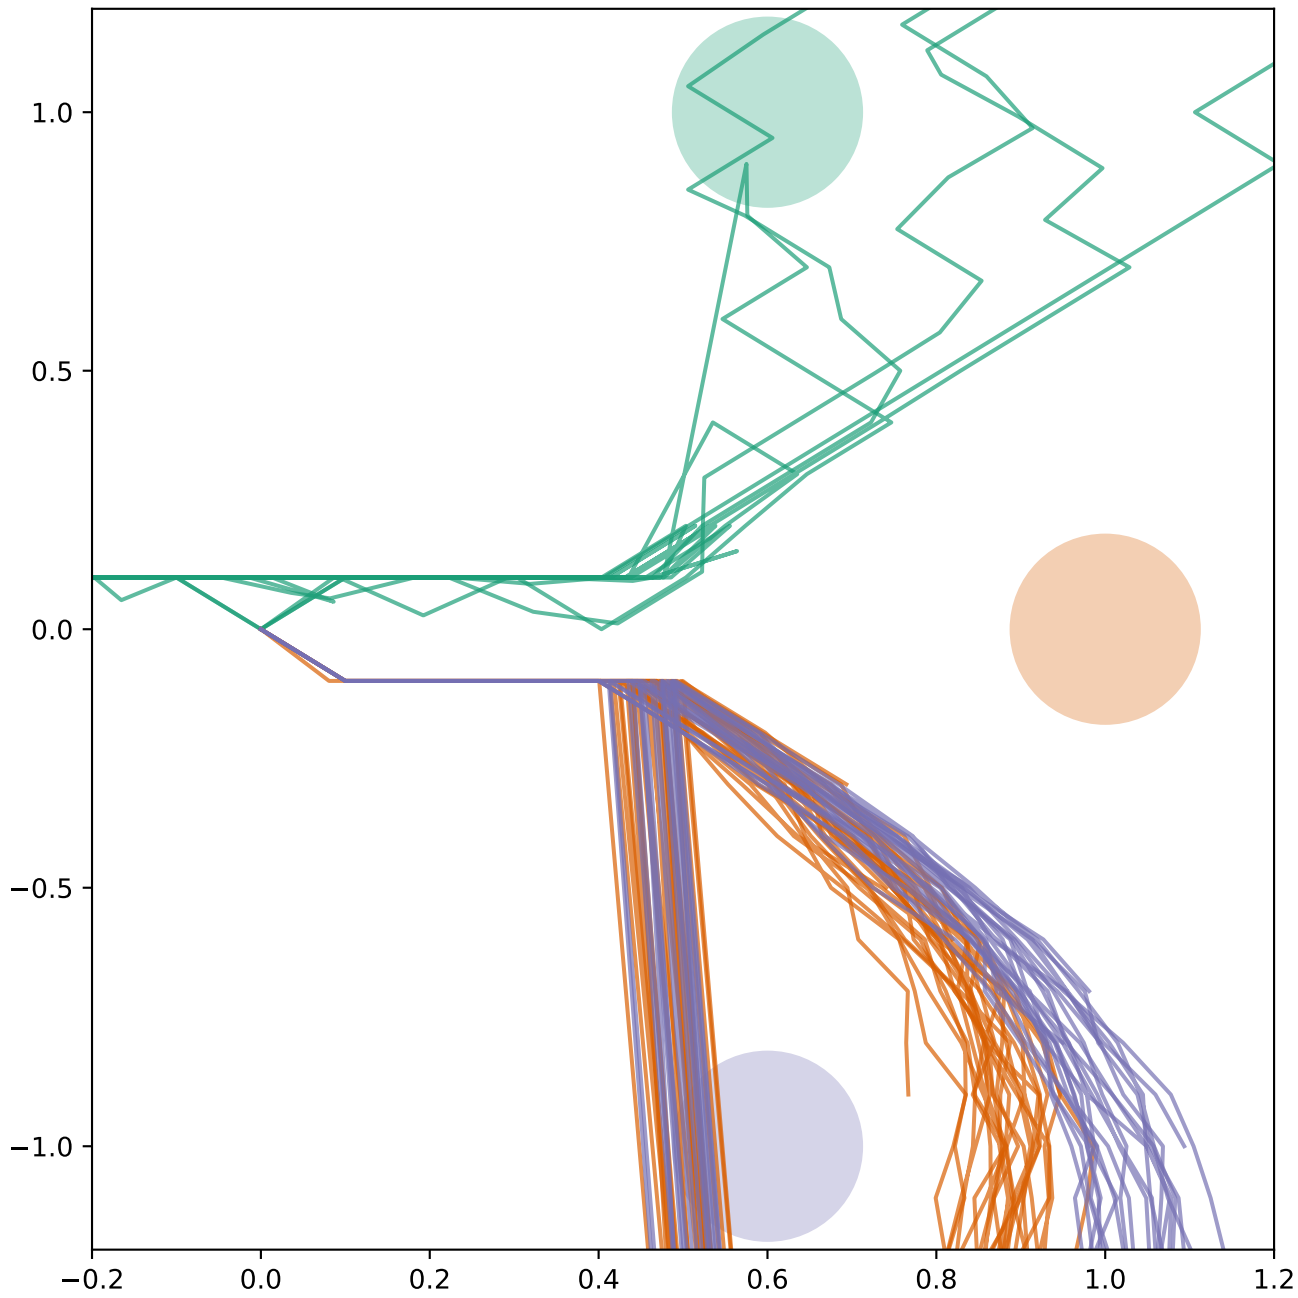

Supplement: supplementary_material [file attachment]

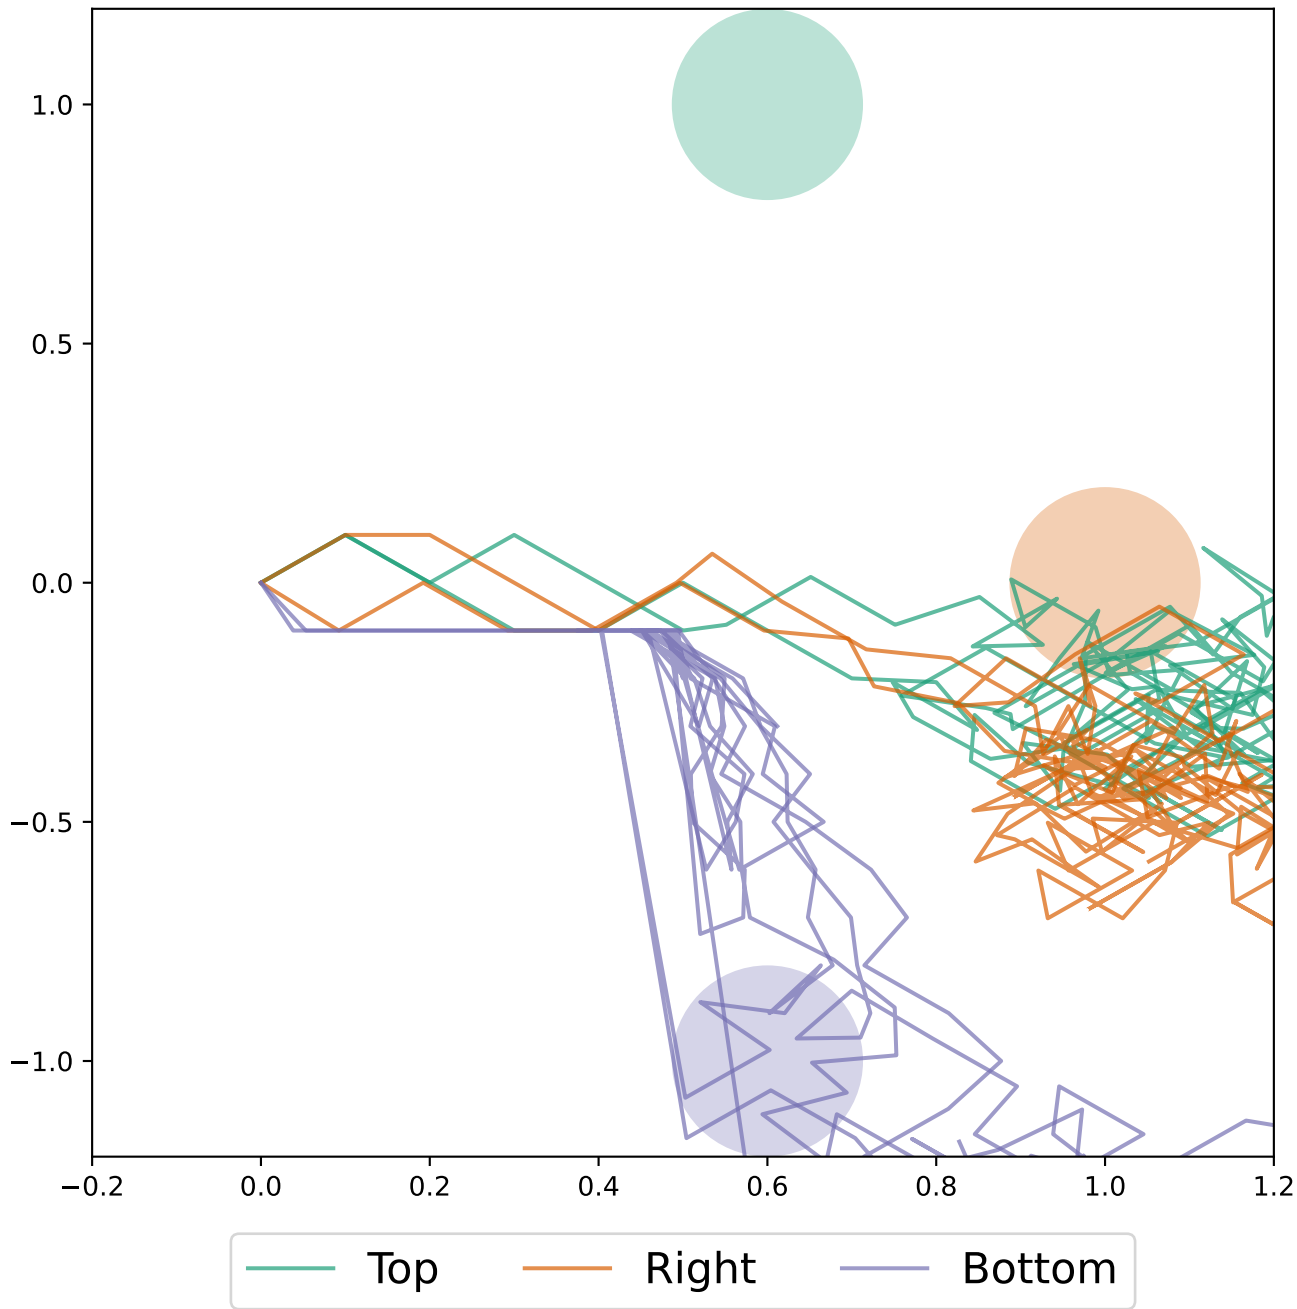

Supplement: supplementary_material [file attachment]

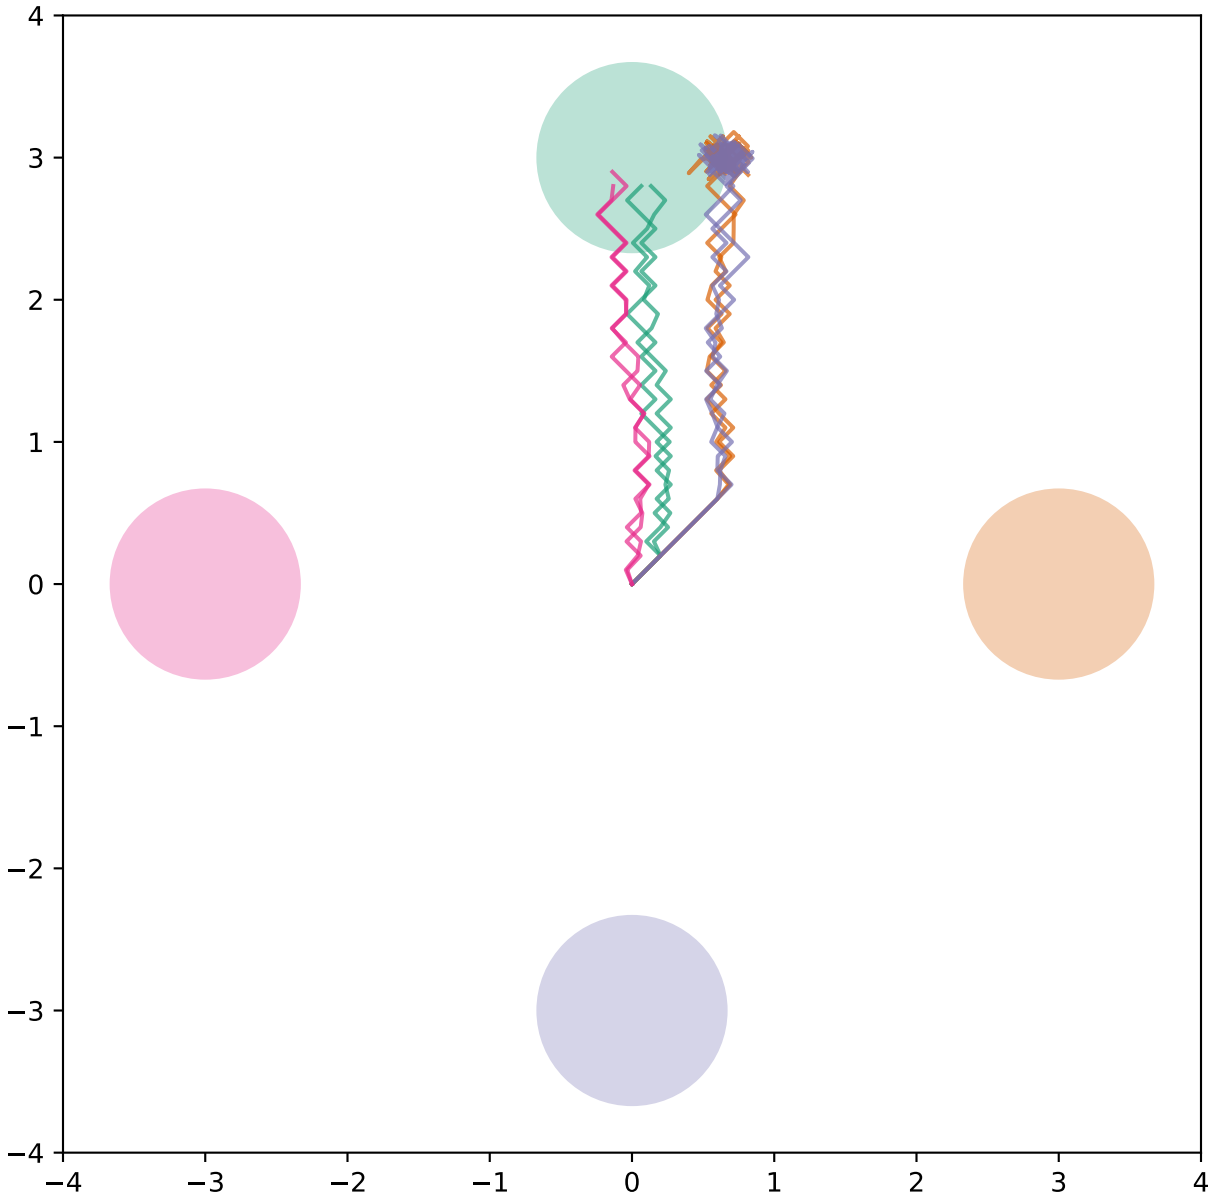

Top

Right

Bottom

Left

Supplement: supplementary_material [file attachment]

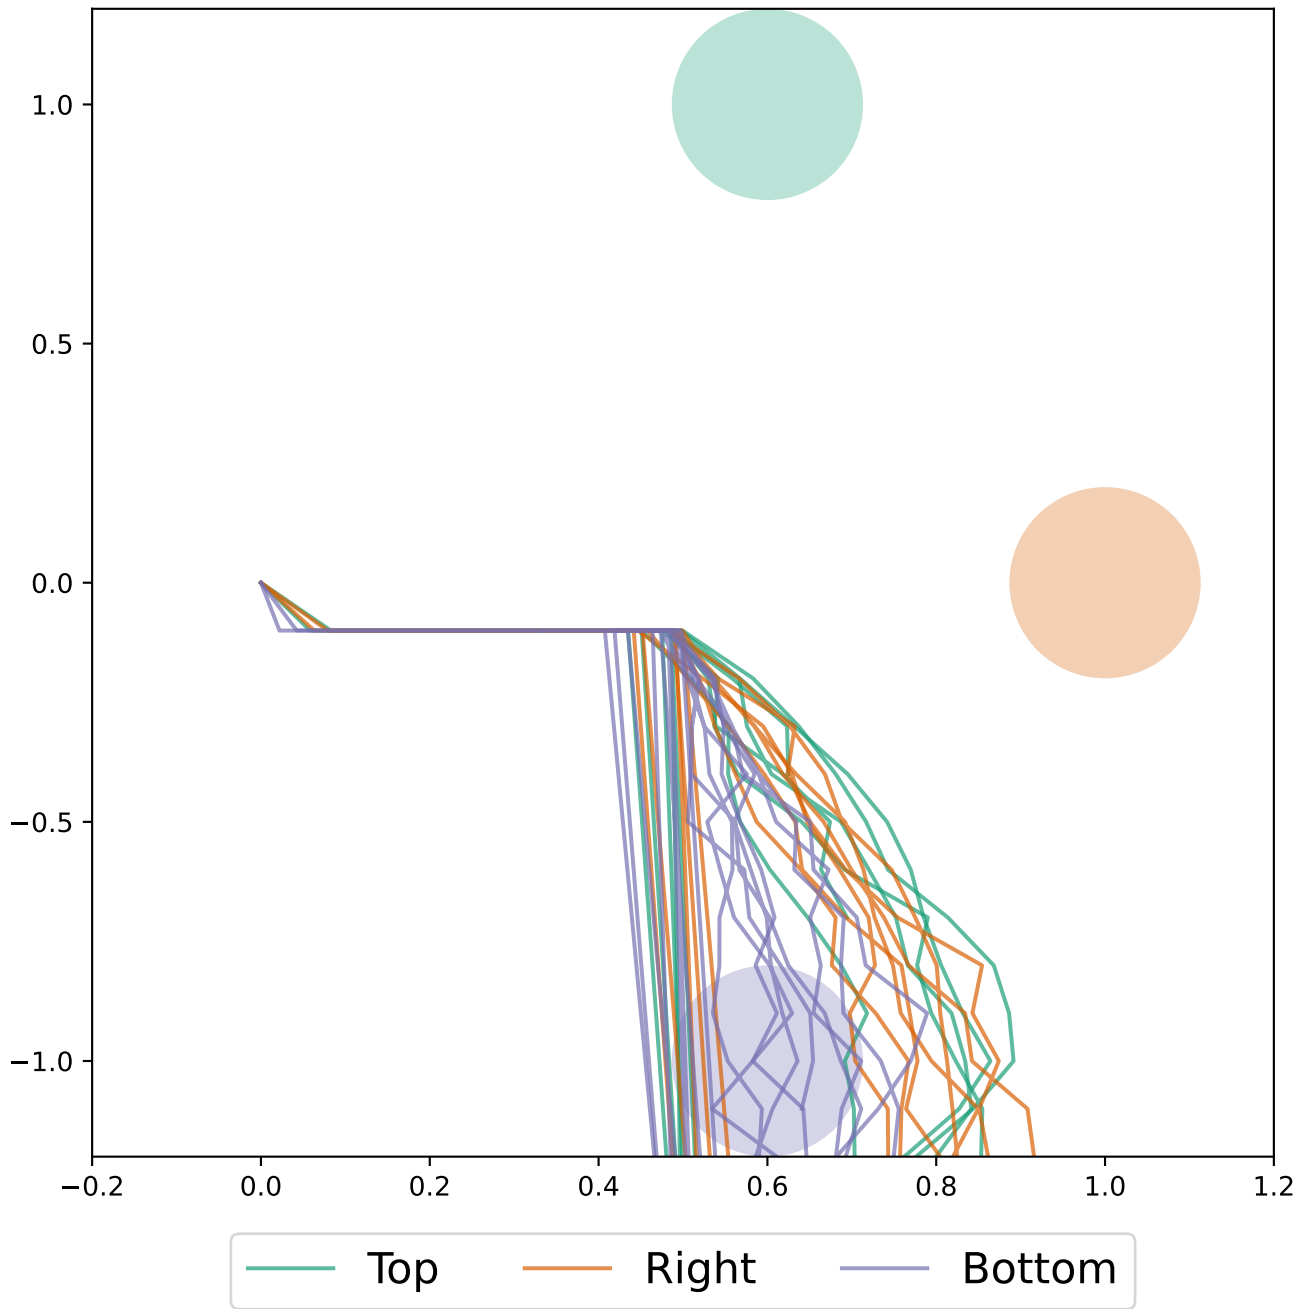

Supplement: supplementary_material [file attachment]

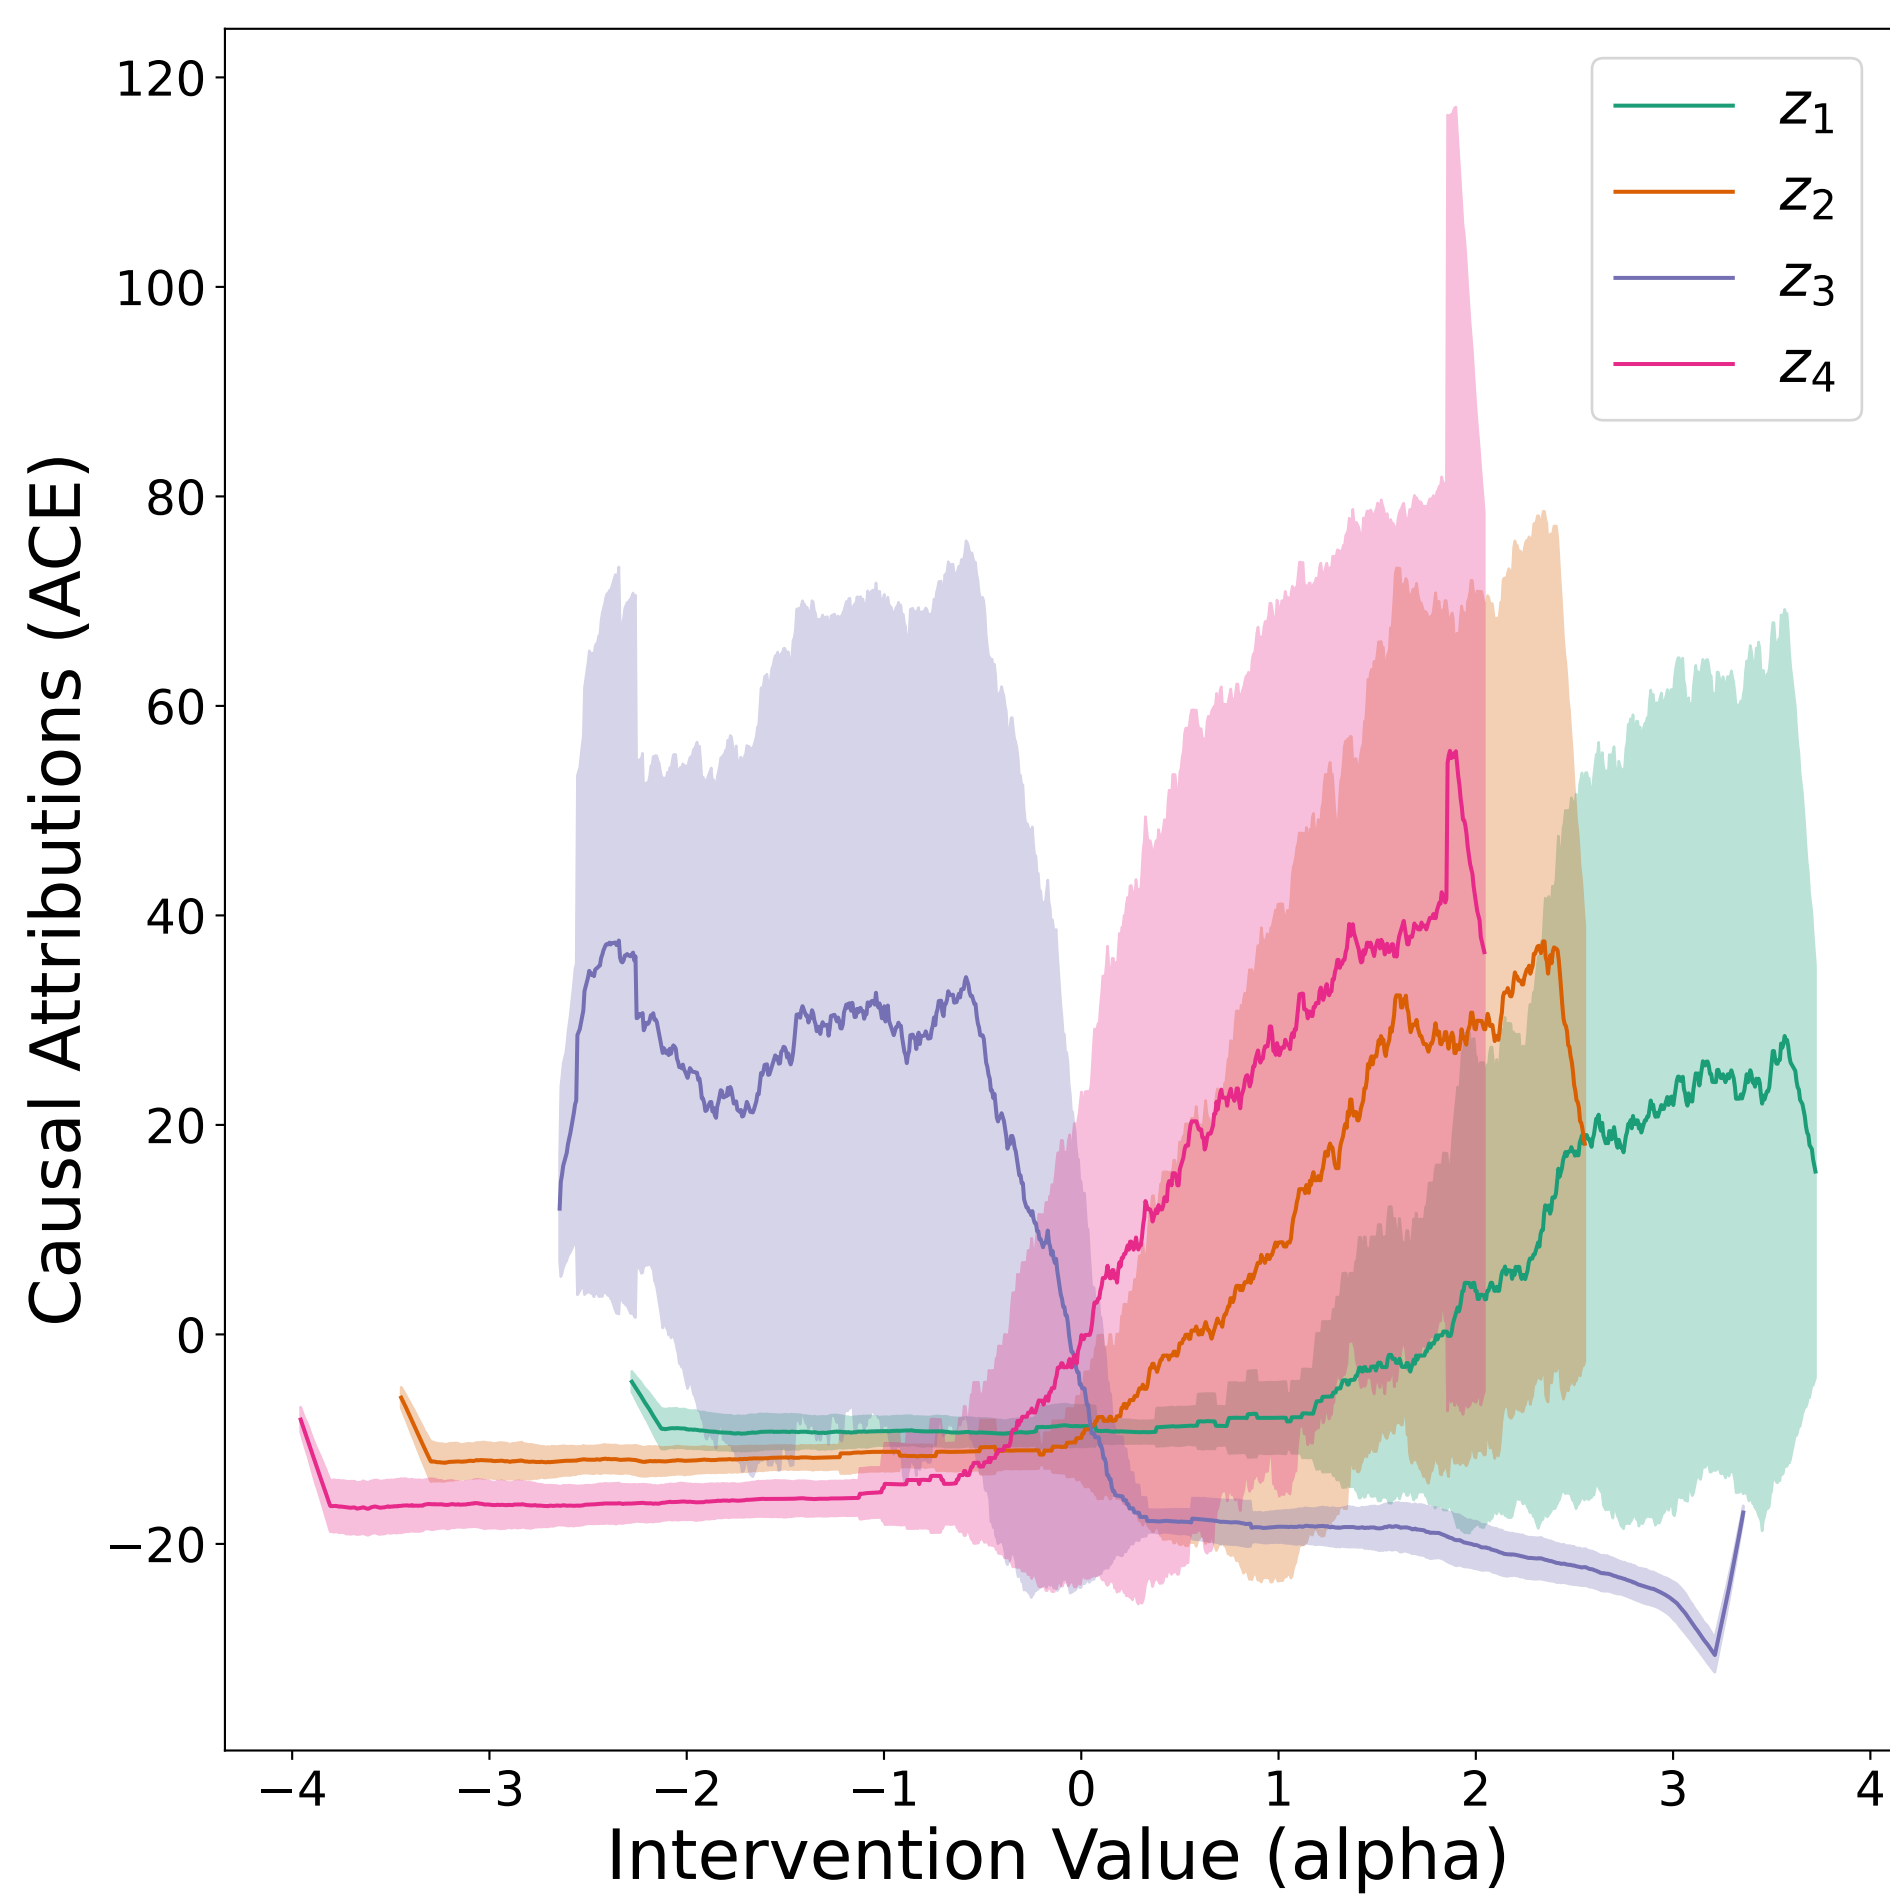

Supplement: supplementary_material [file attachment]

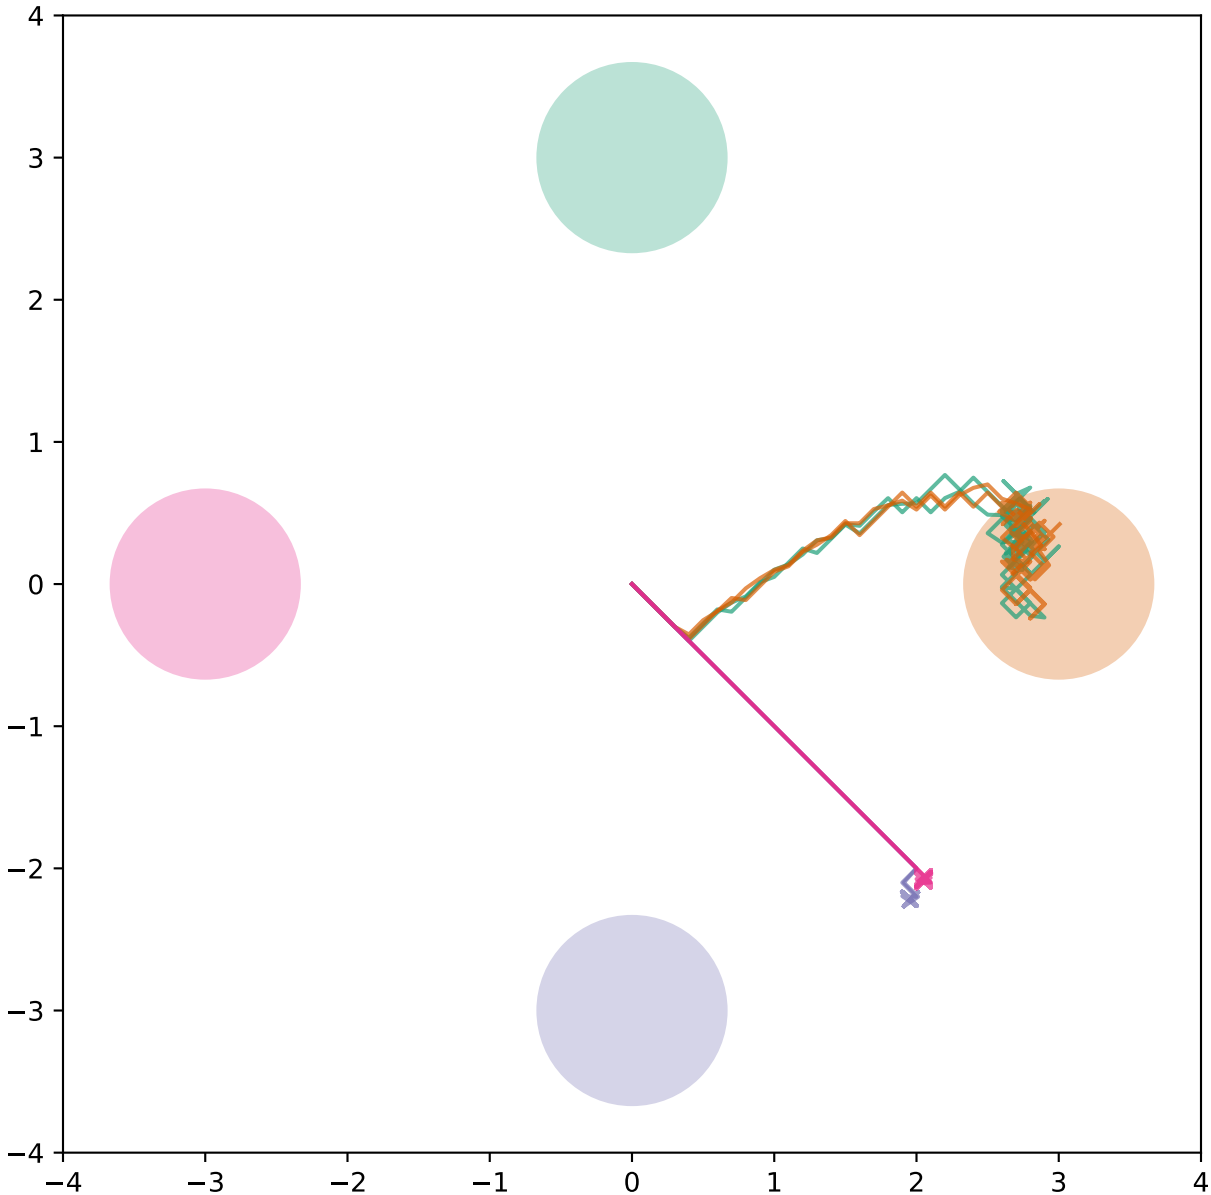

Top Right Bottom Left

Supplement: supplementary_material [file attachment]

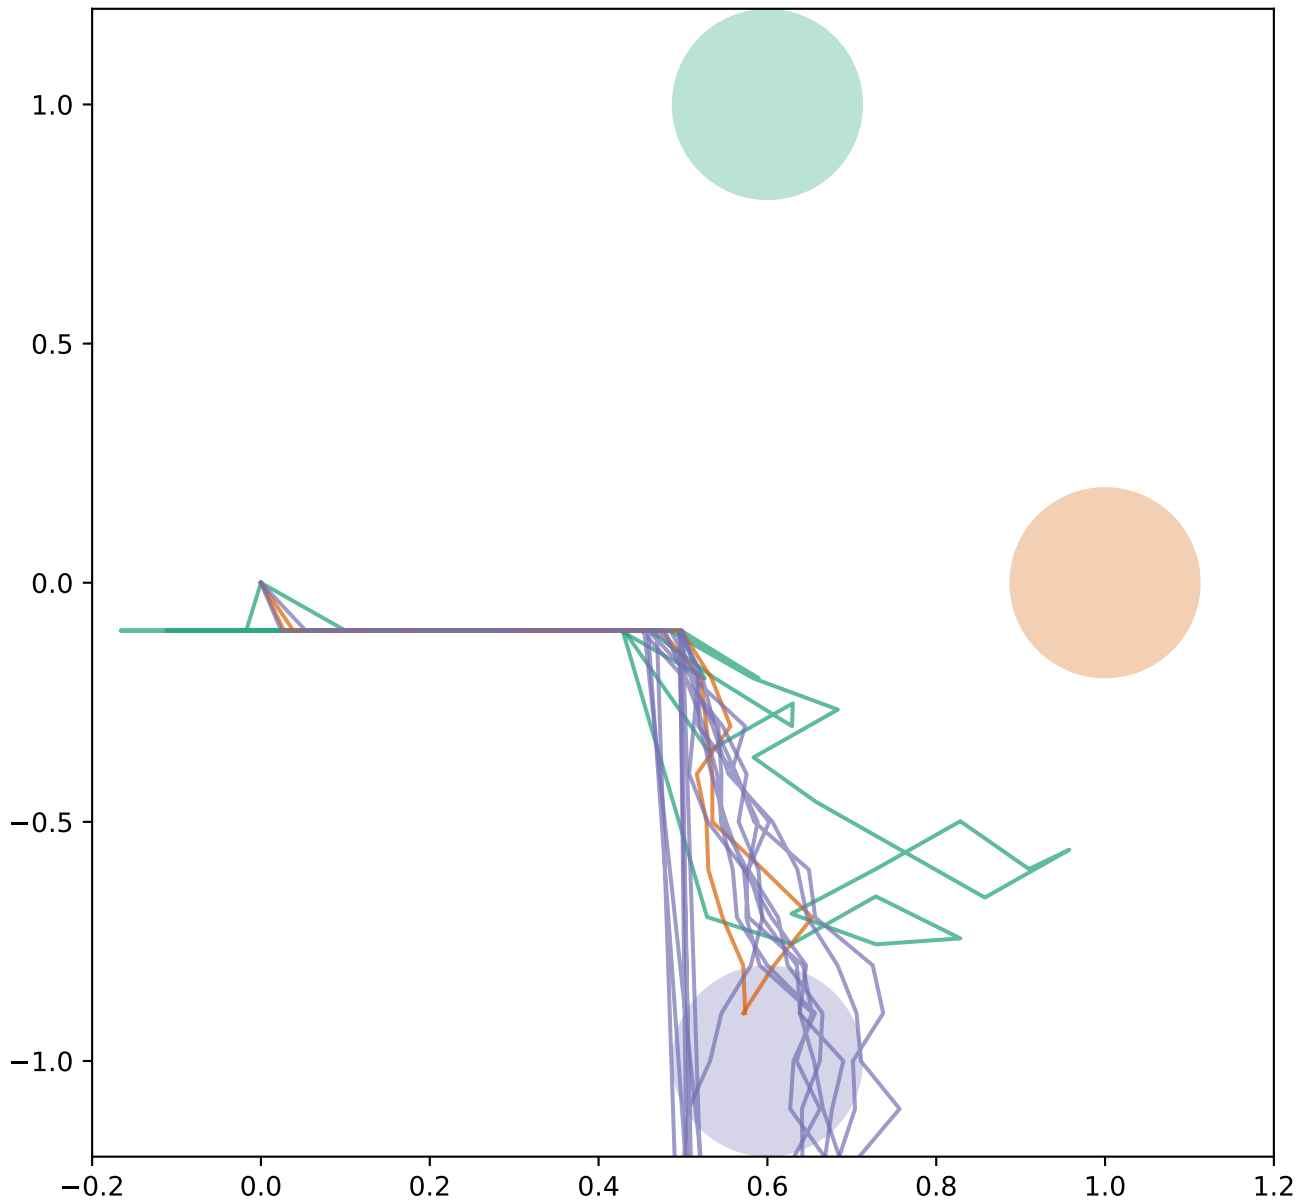

— Top      — Right      — Bottom

Supplement: supplementary_material [file attachment]

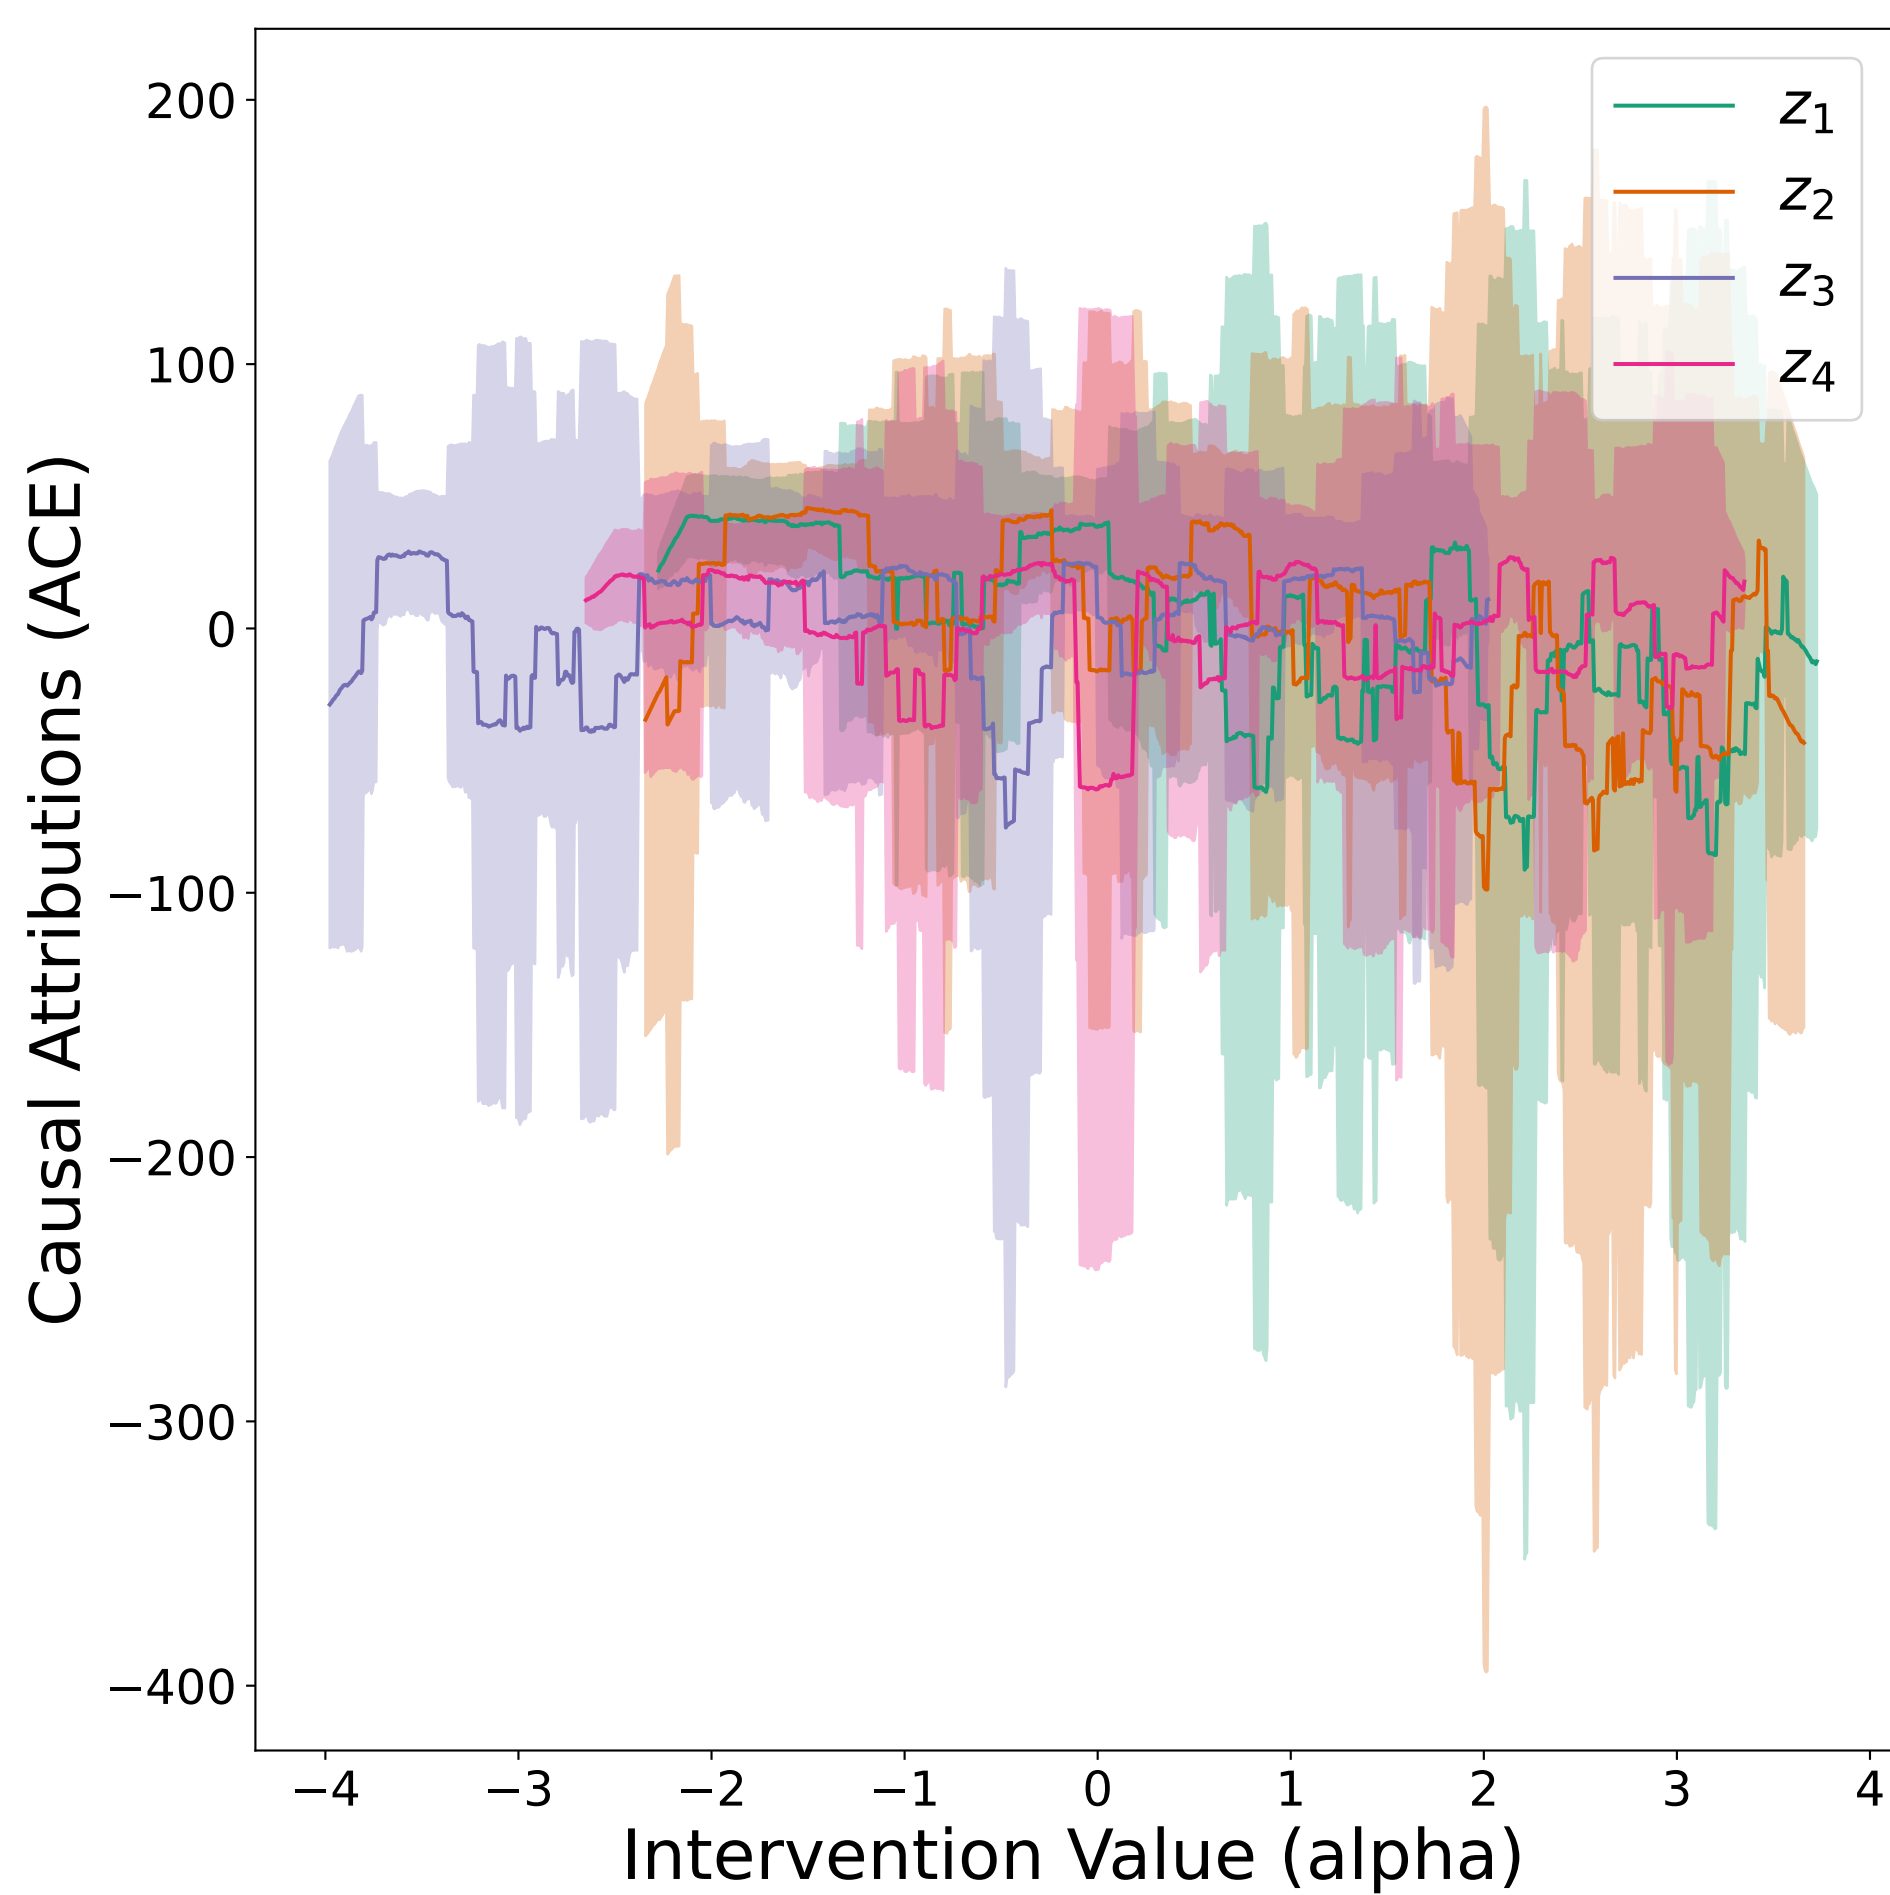

Supplement: supplementary_material [file attachment]

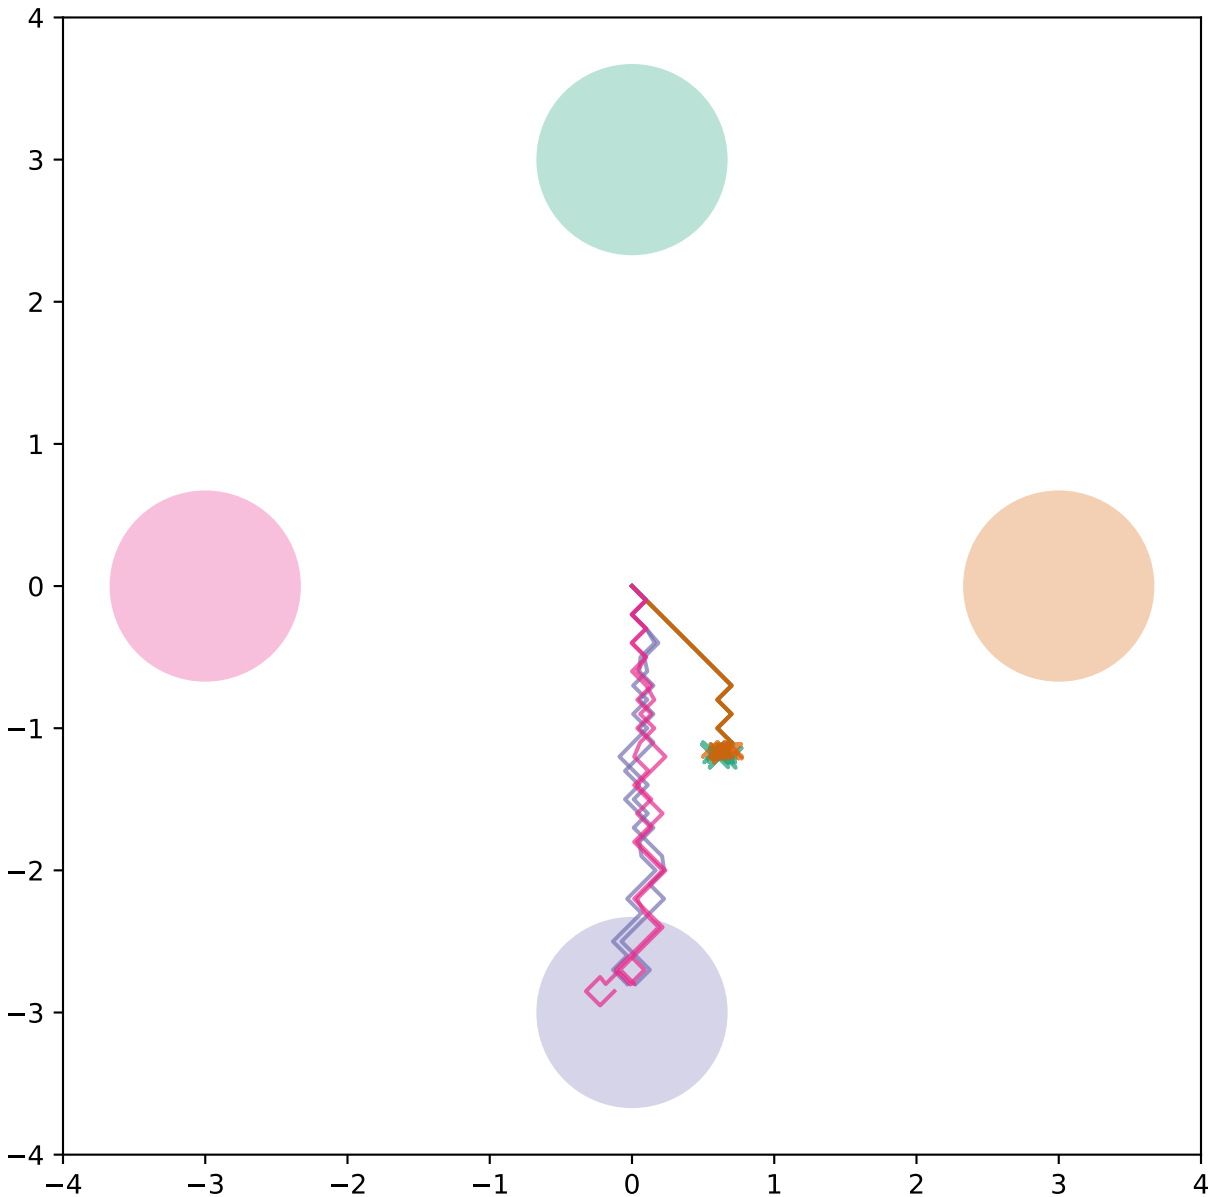

Top Right Bottom Left

Supplement: supplementary_material [file attachment]

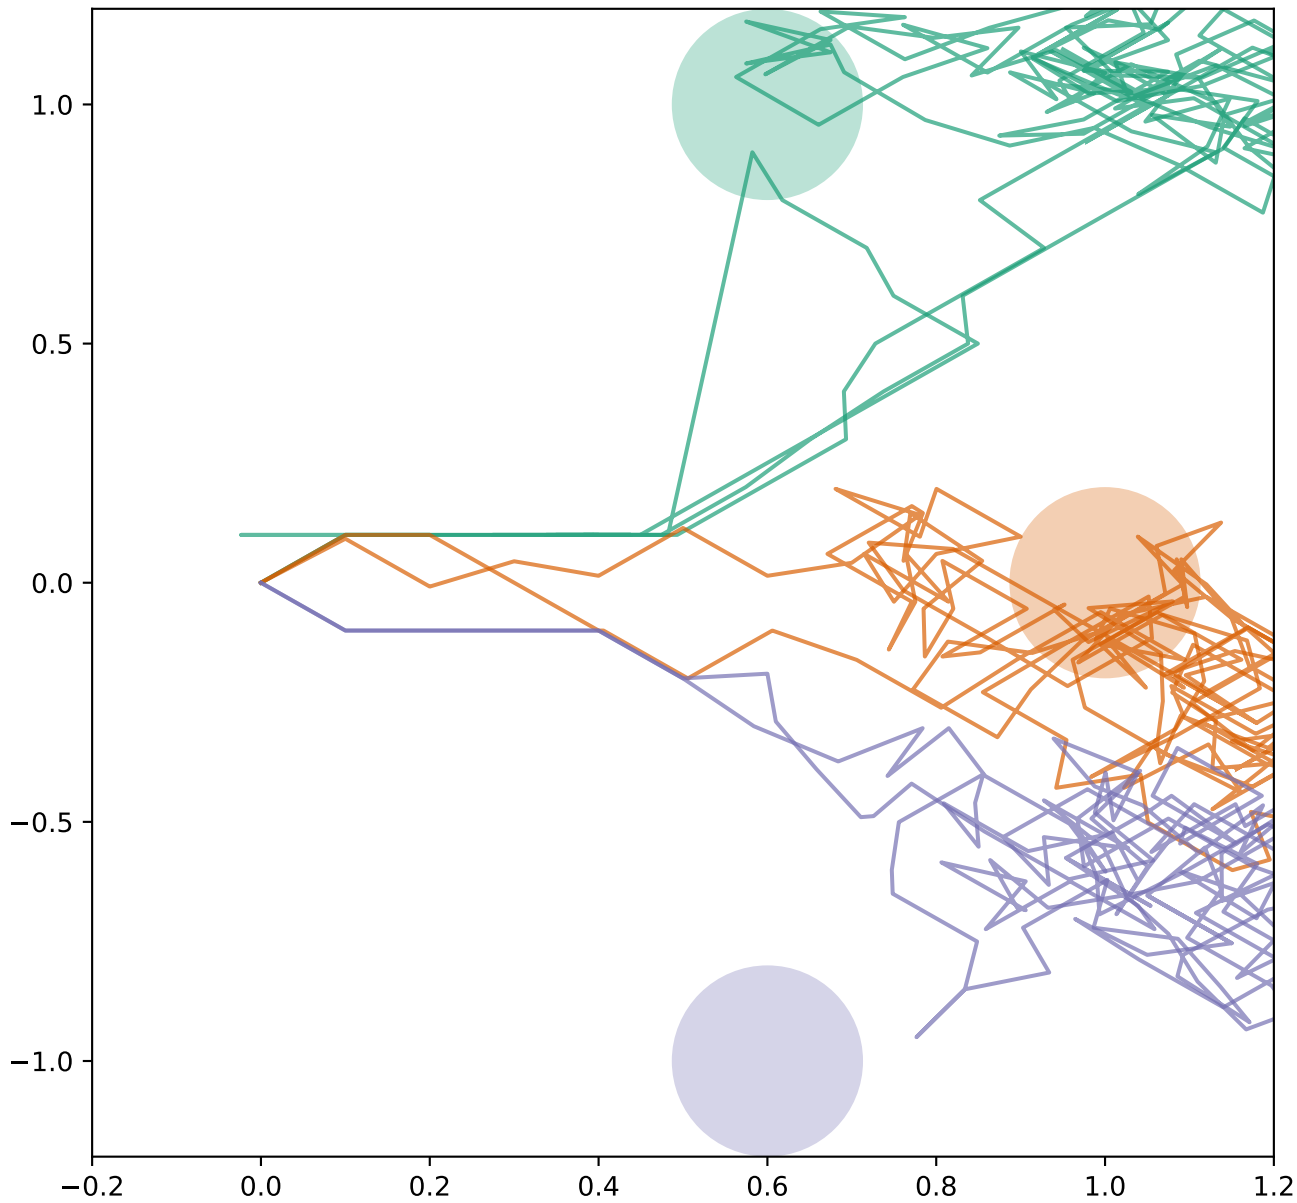

Top Right Bottom

Supplement: supplementary_material [file attachment]

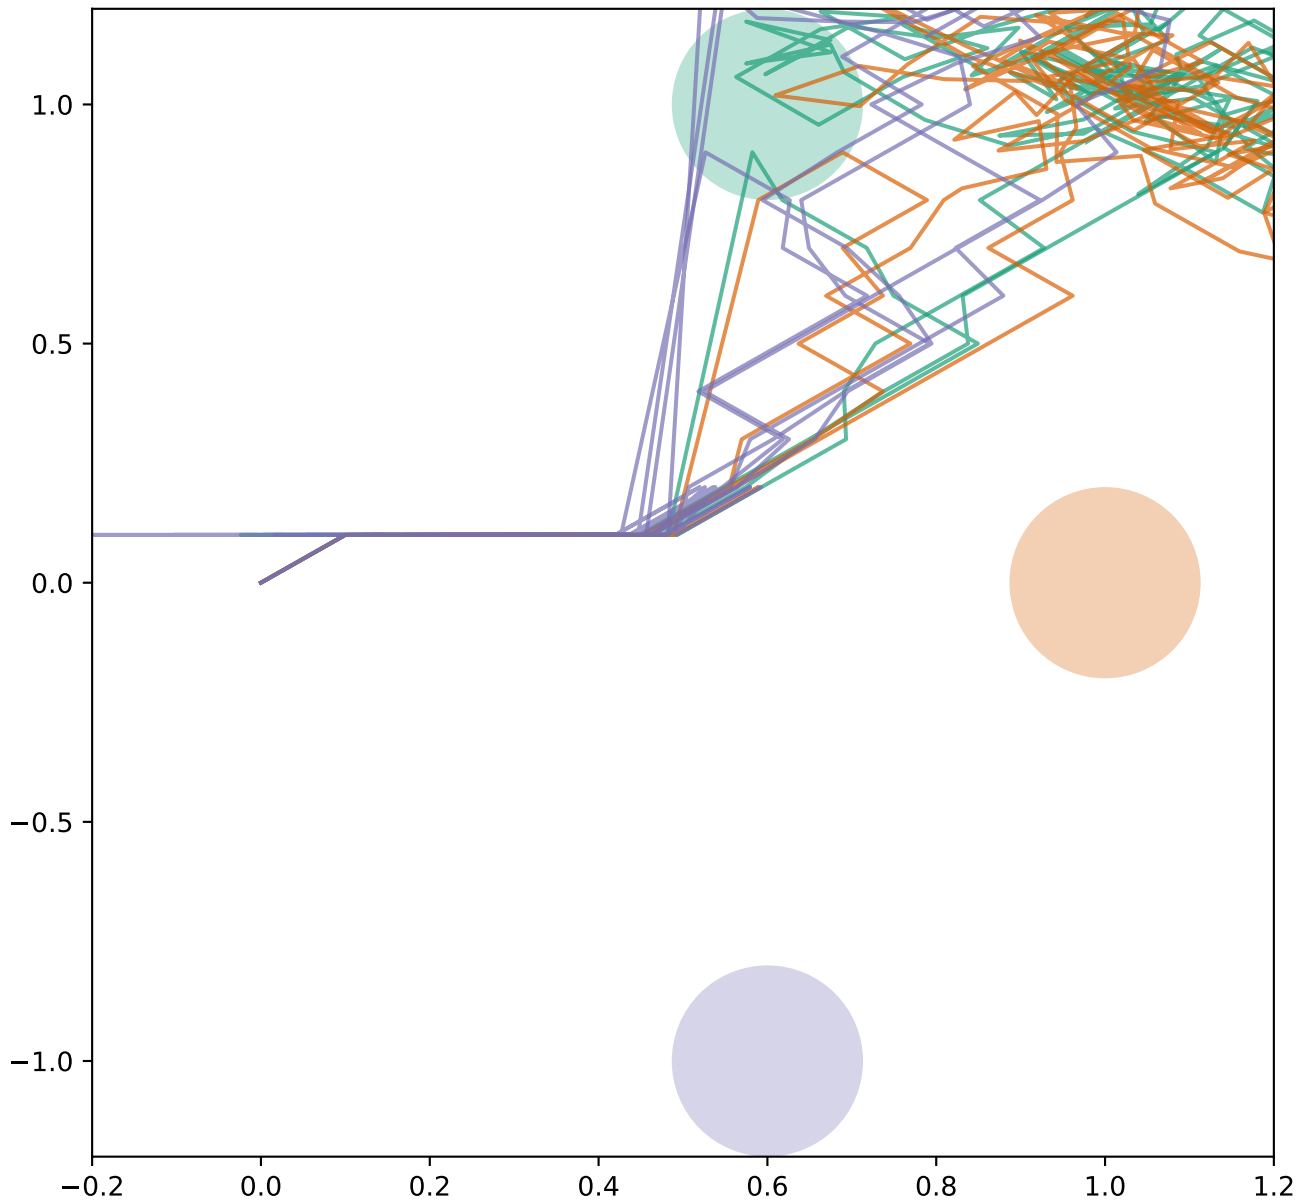

— Top      — Right      — Bottom

Supplement: supplementary_material [file attachment]

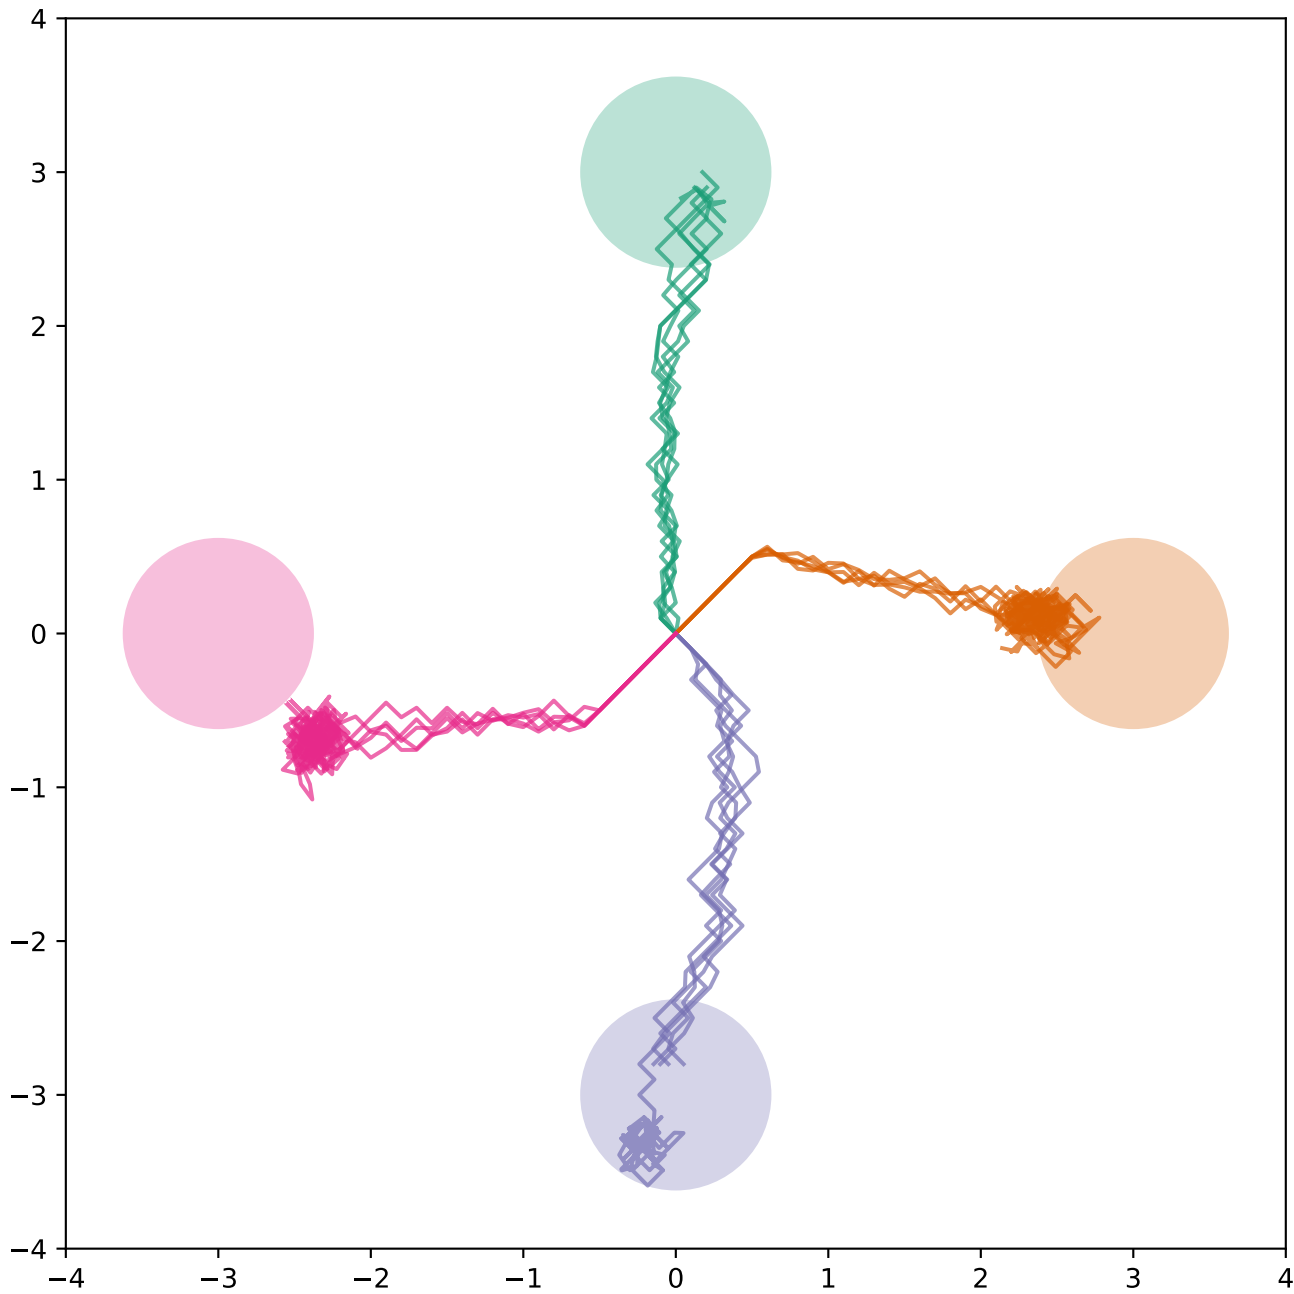

Supplement: supplementary_material [file attachment]

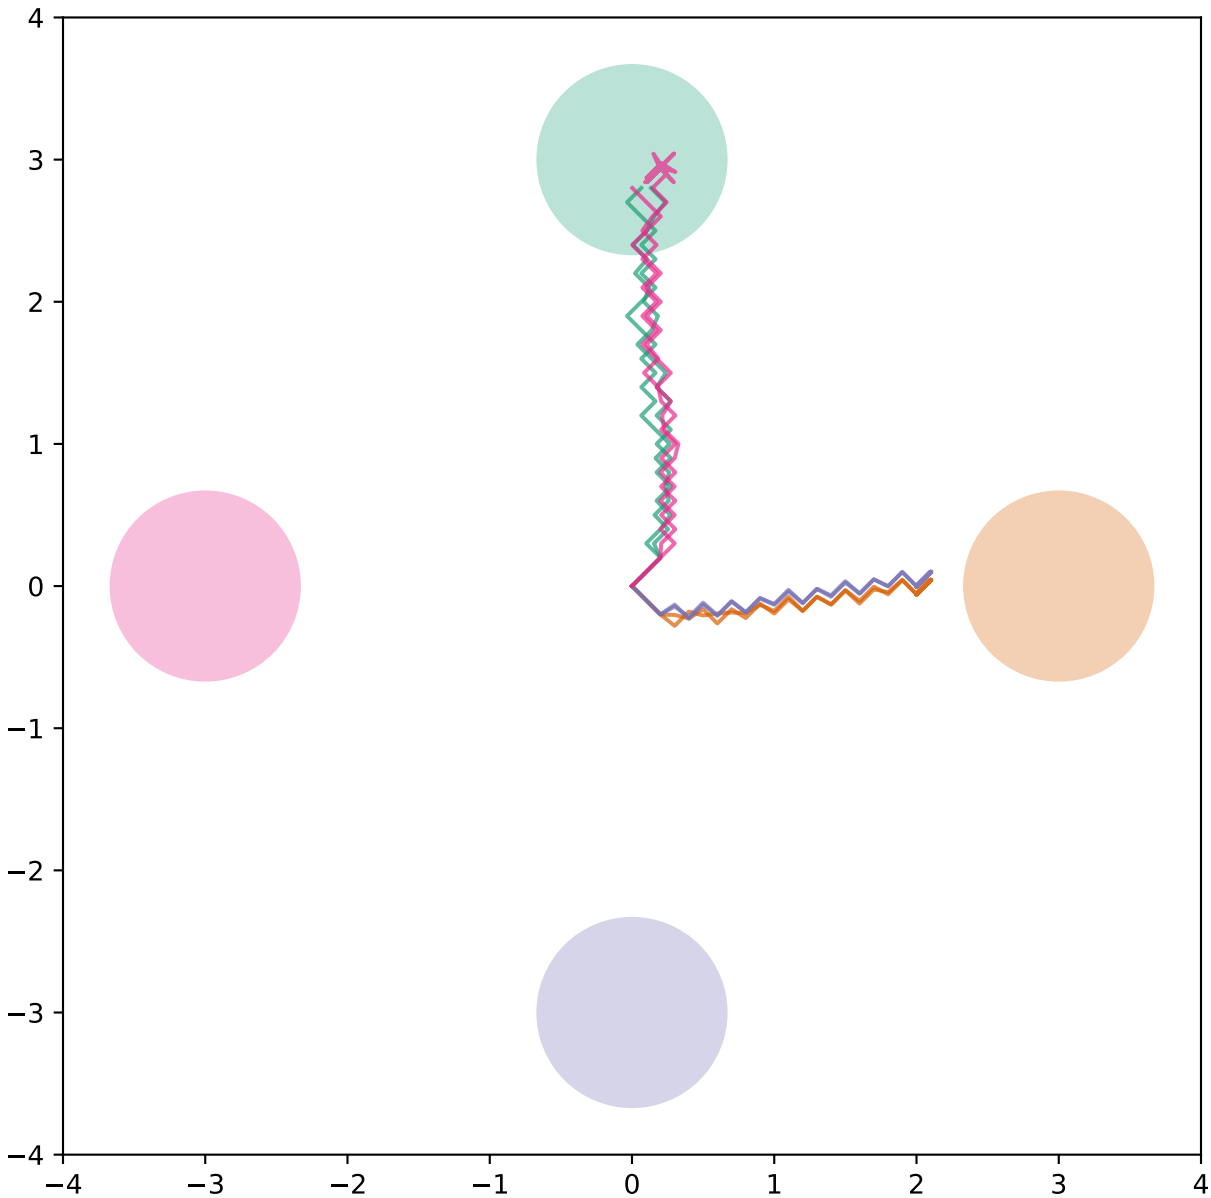

Top Right Bottom Left

Supplement: supplementary_material [file attachment]

Causal Attributions (ACE)

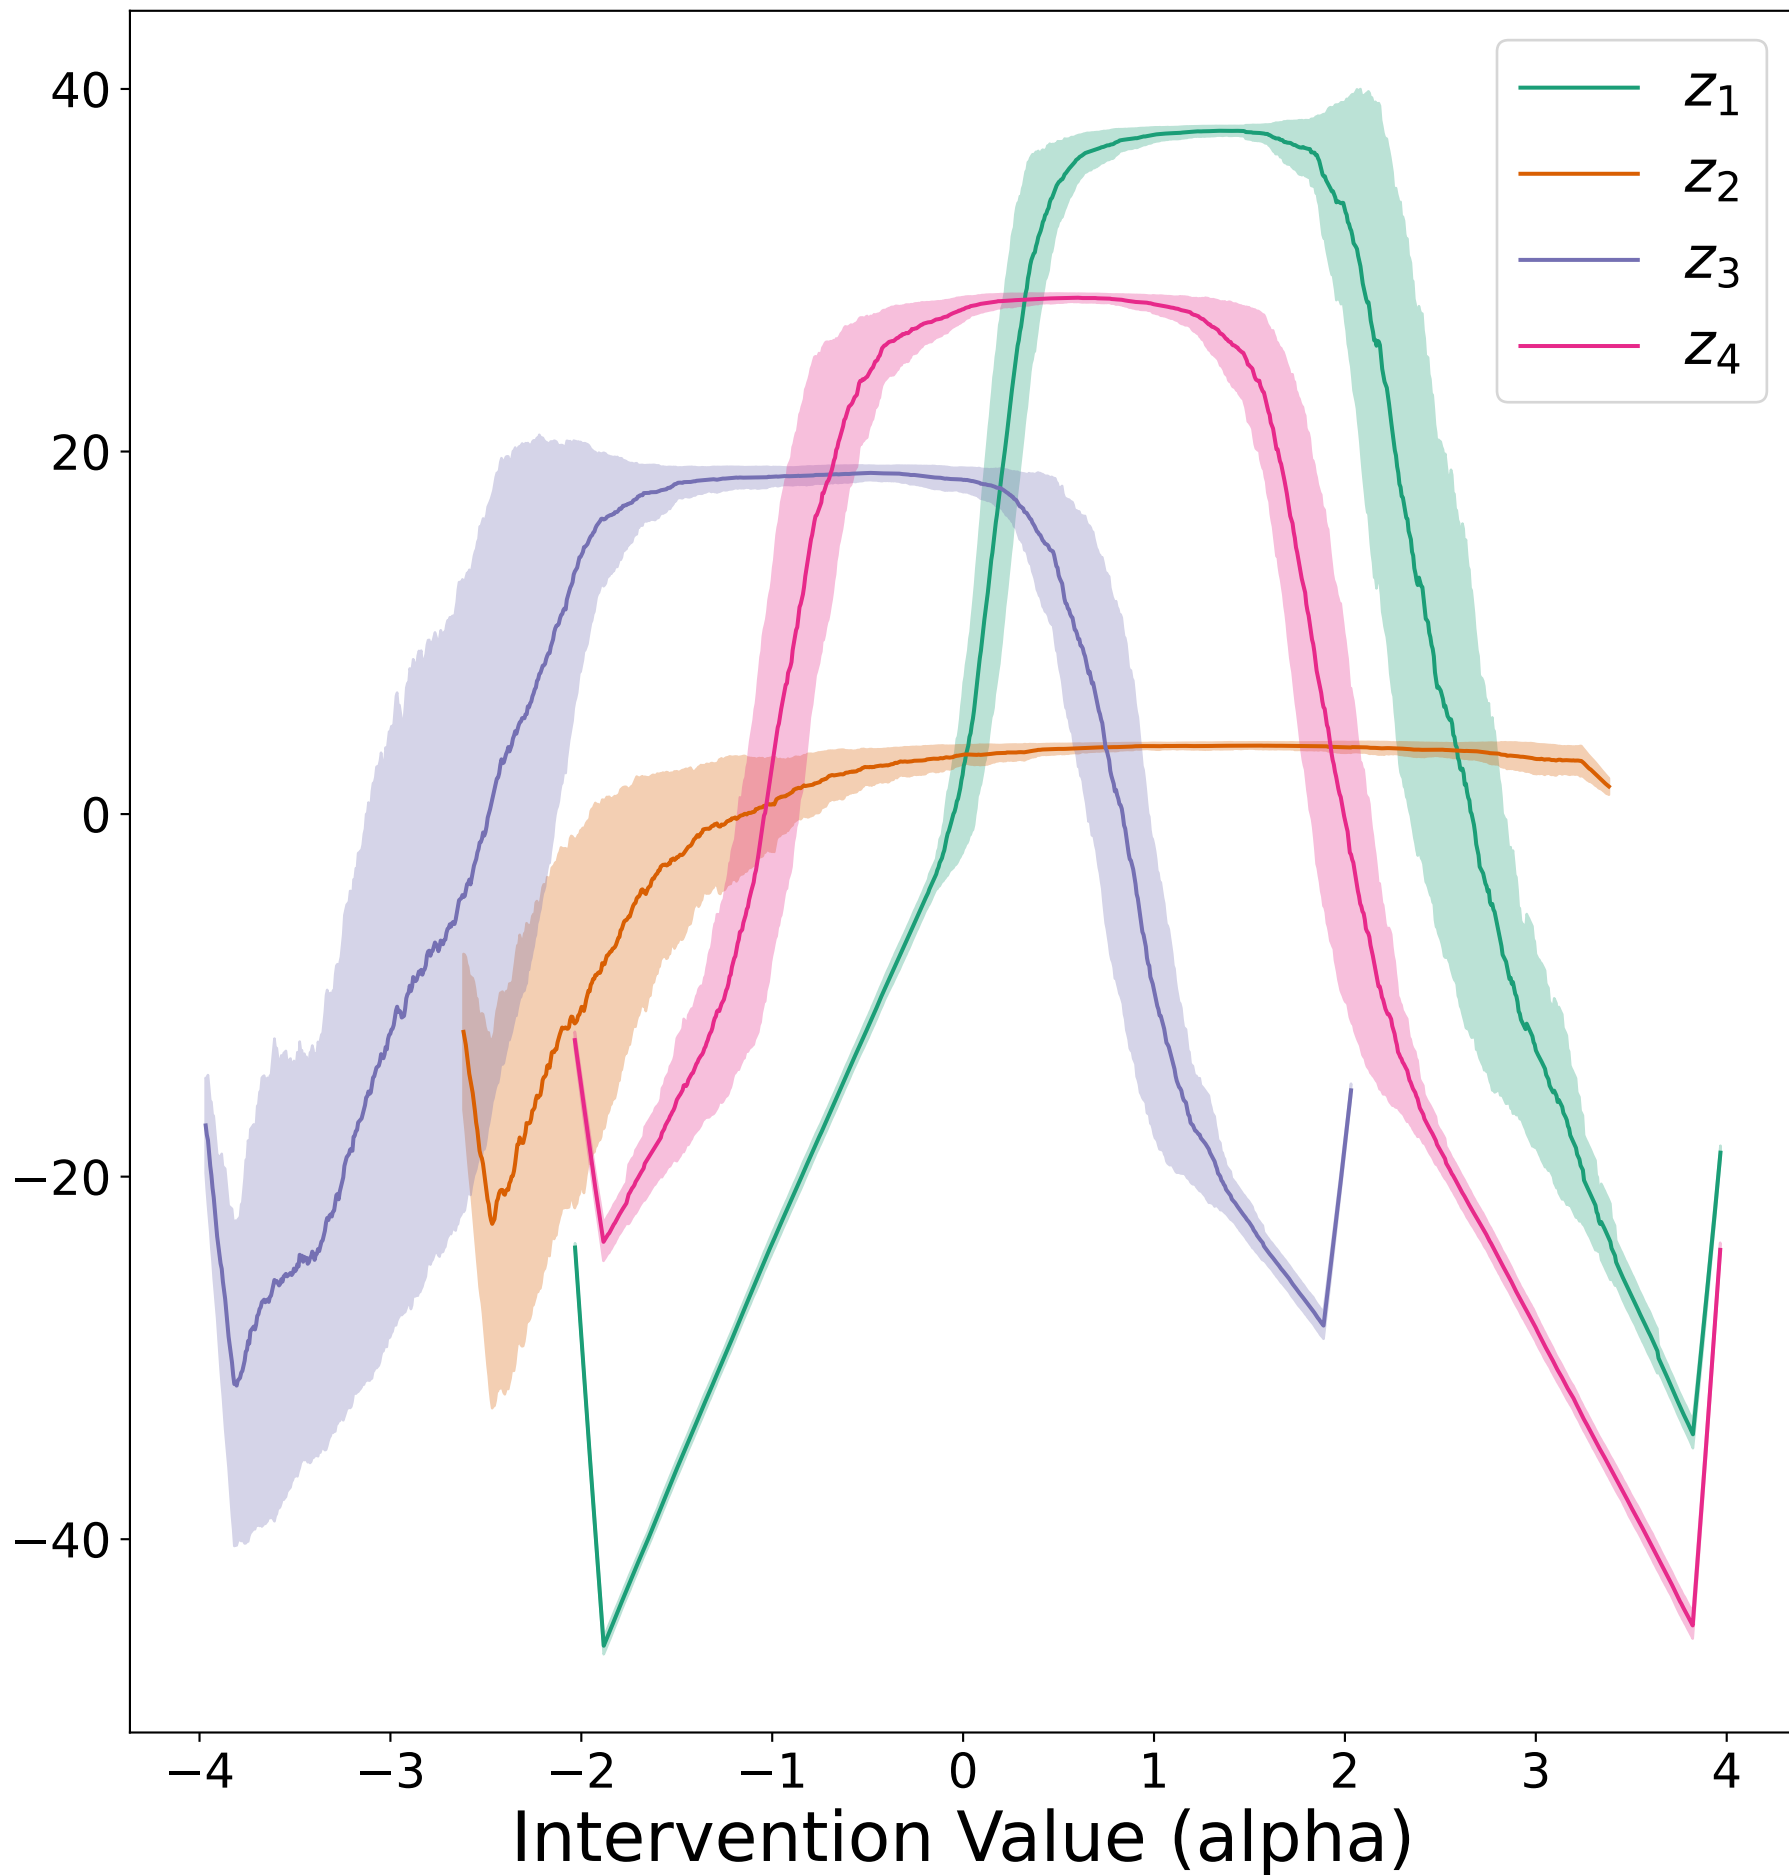

Supplement: supplementary_material [file attachment]

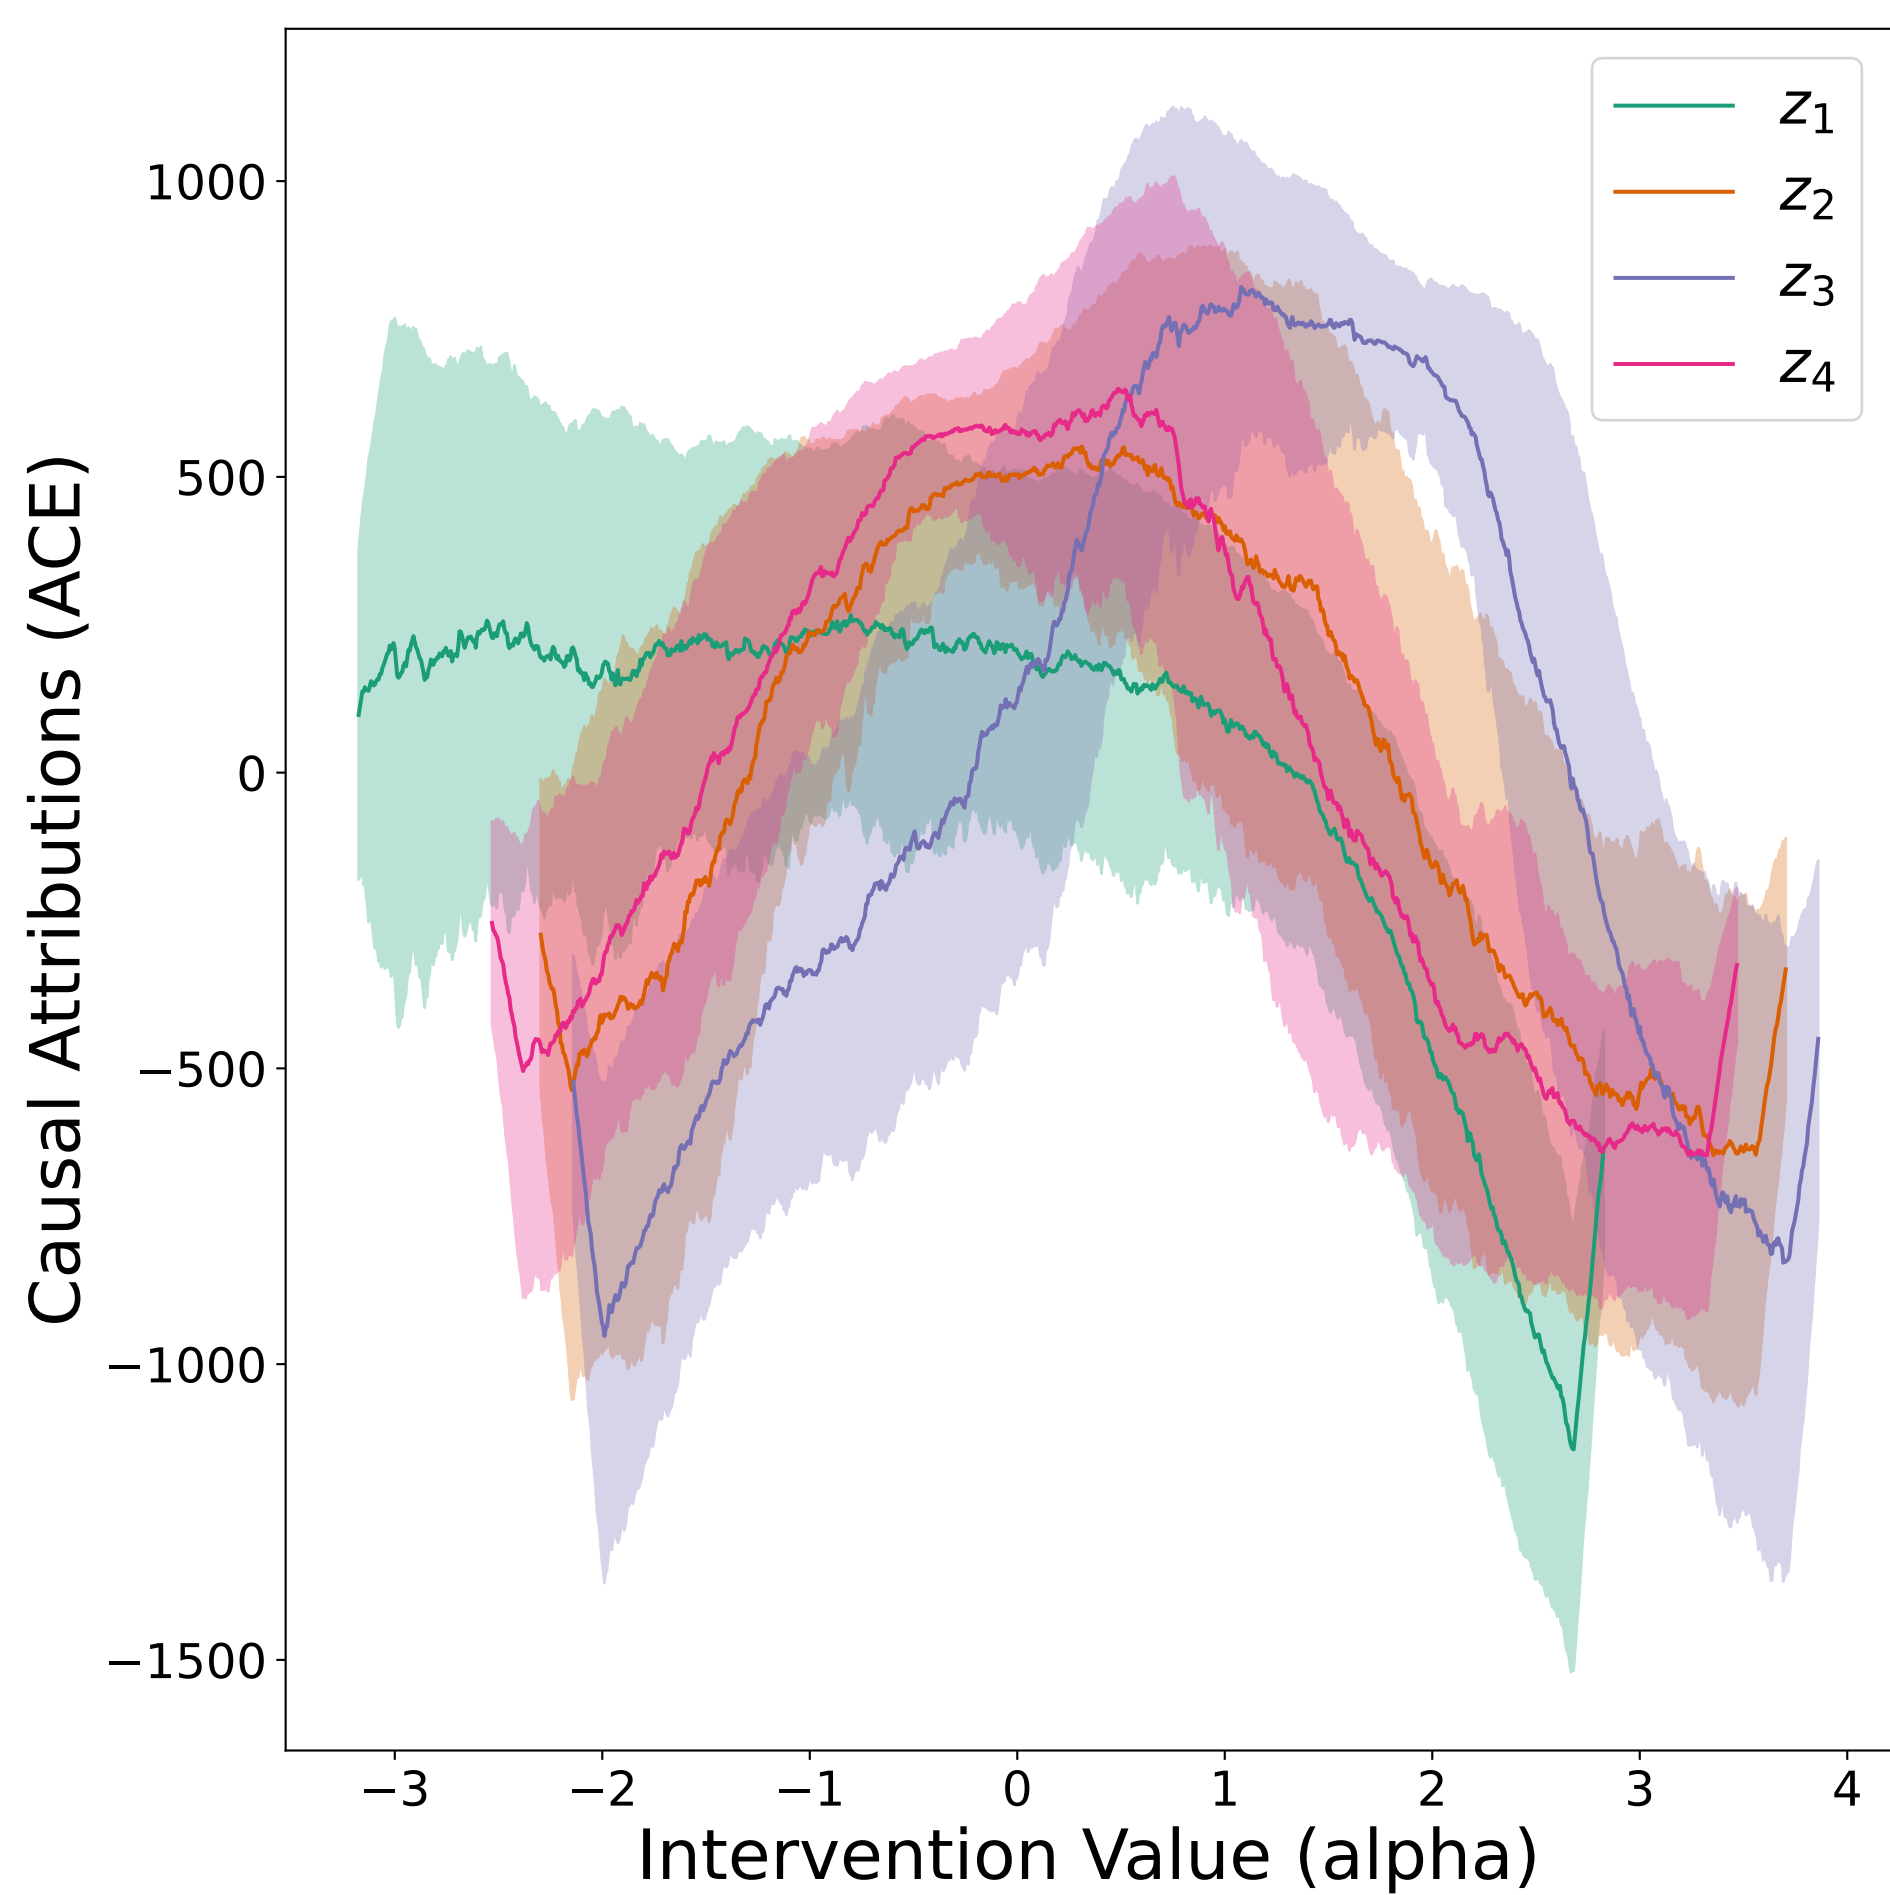

Supplement: supplementary_material [file attachment]

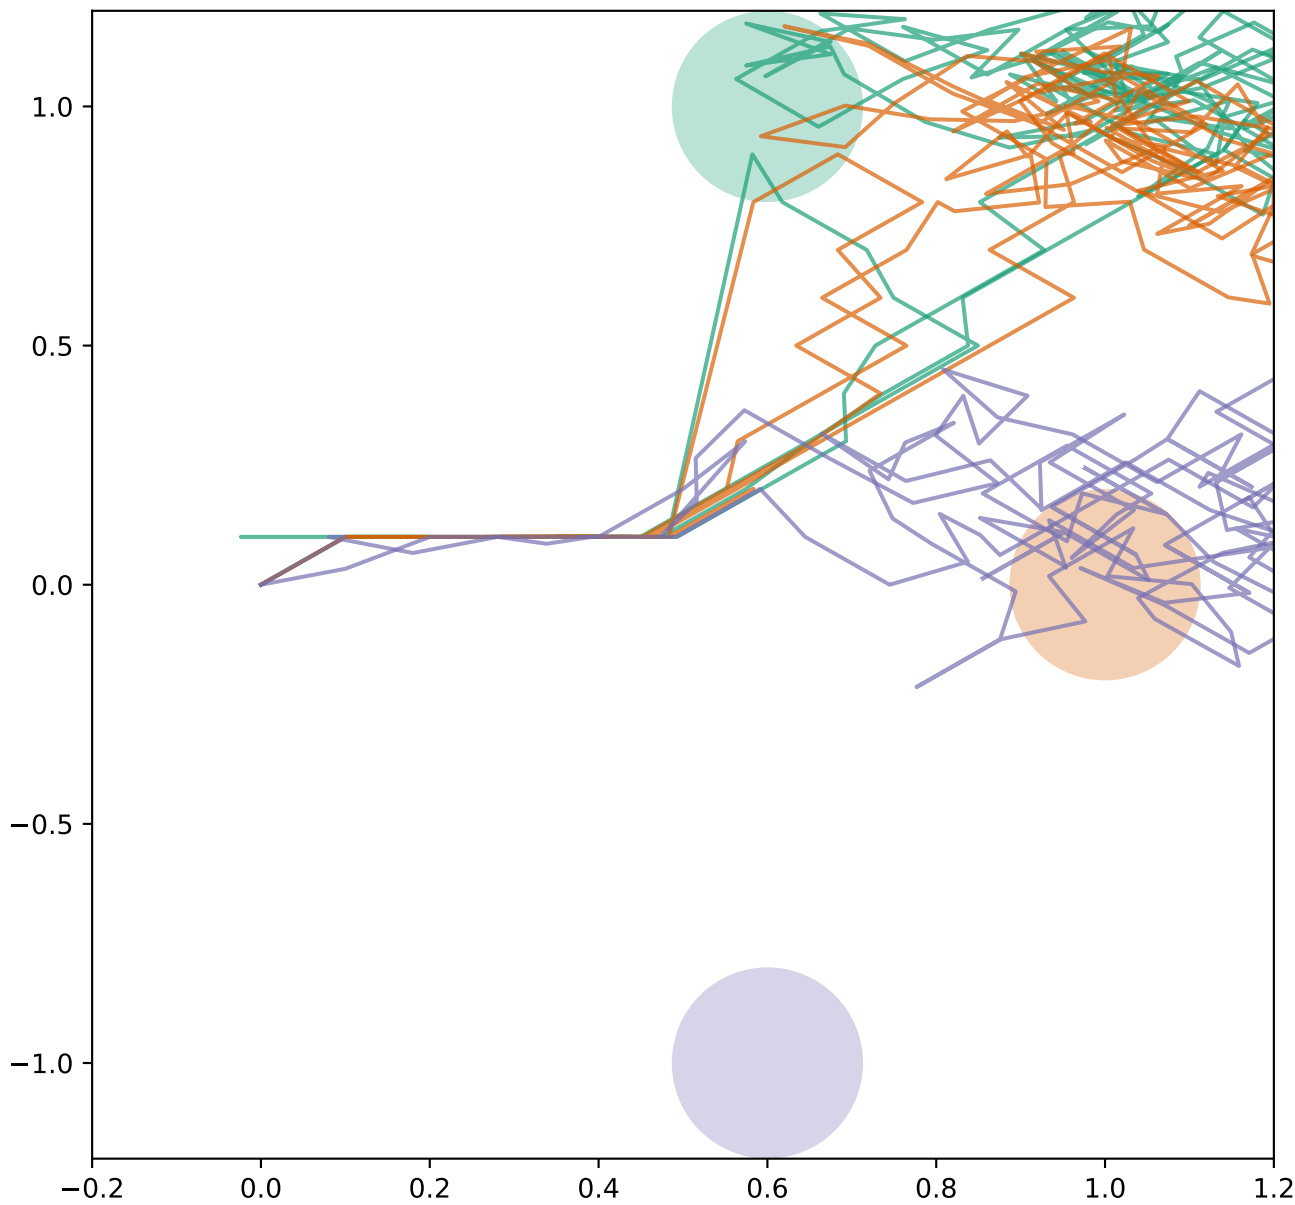

Top Right Bottom

Supplement: supplementary_material [file attachment]

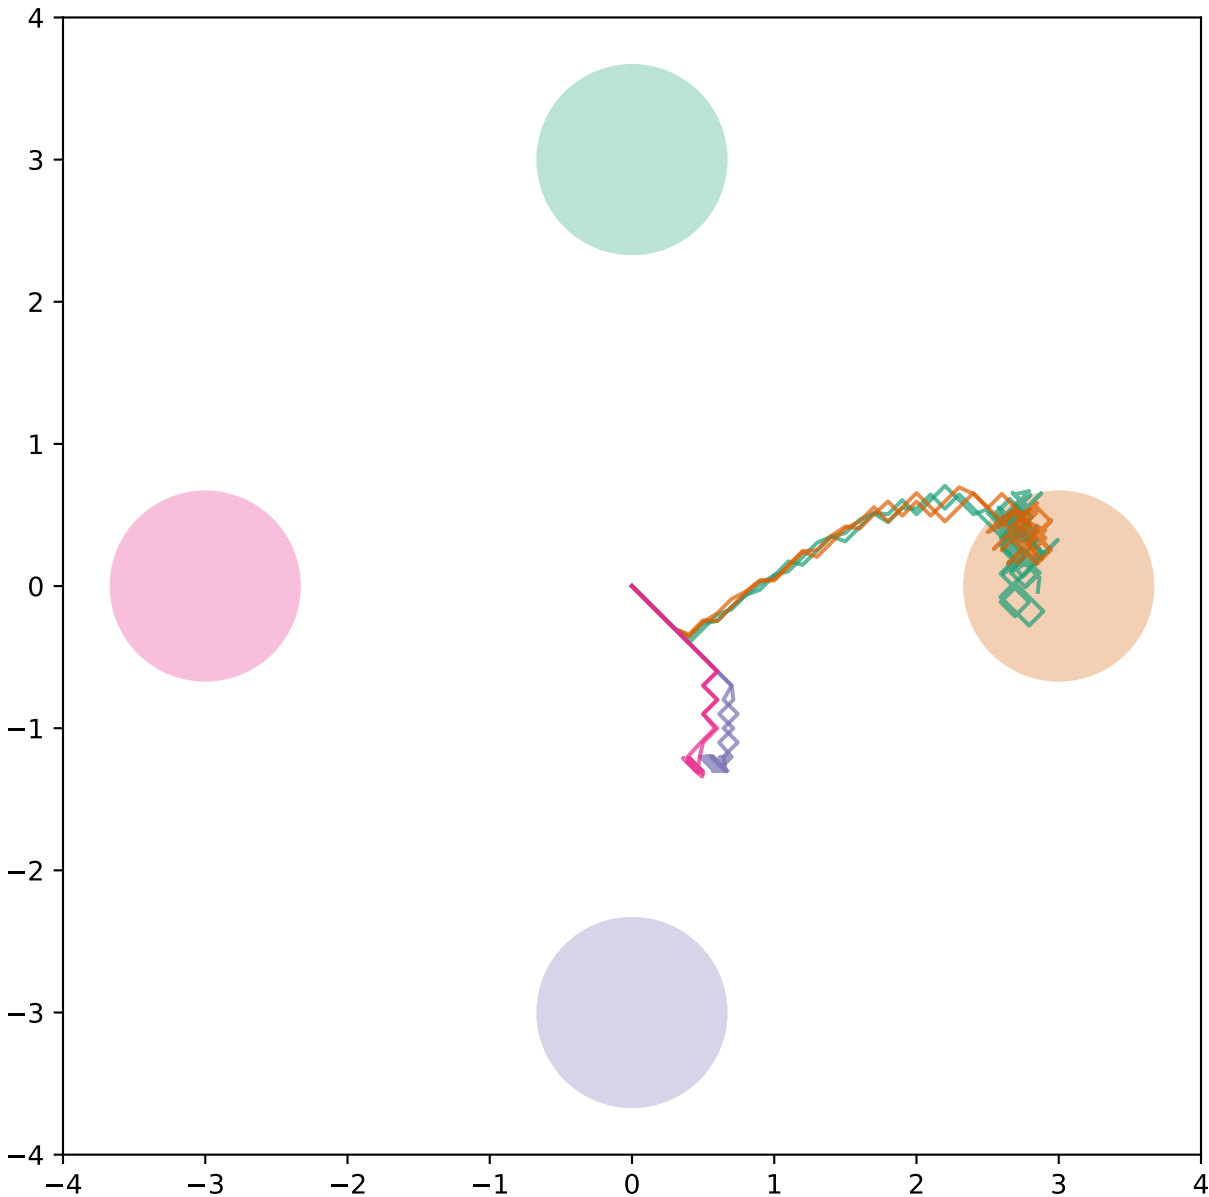

Top Right Bottom Left

Supplement: supplementary_material [file attachment]

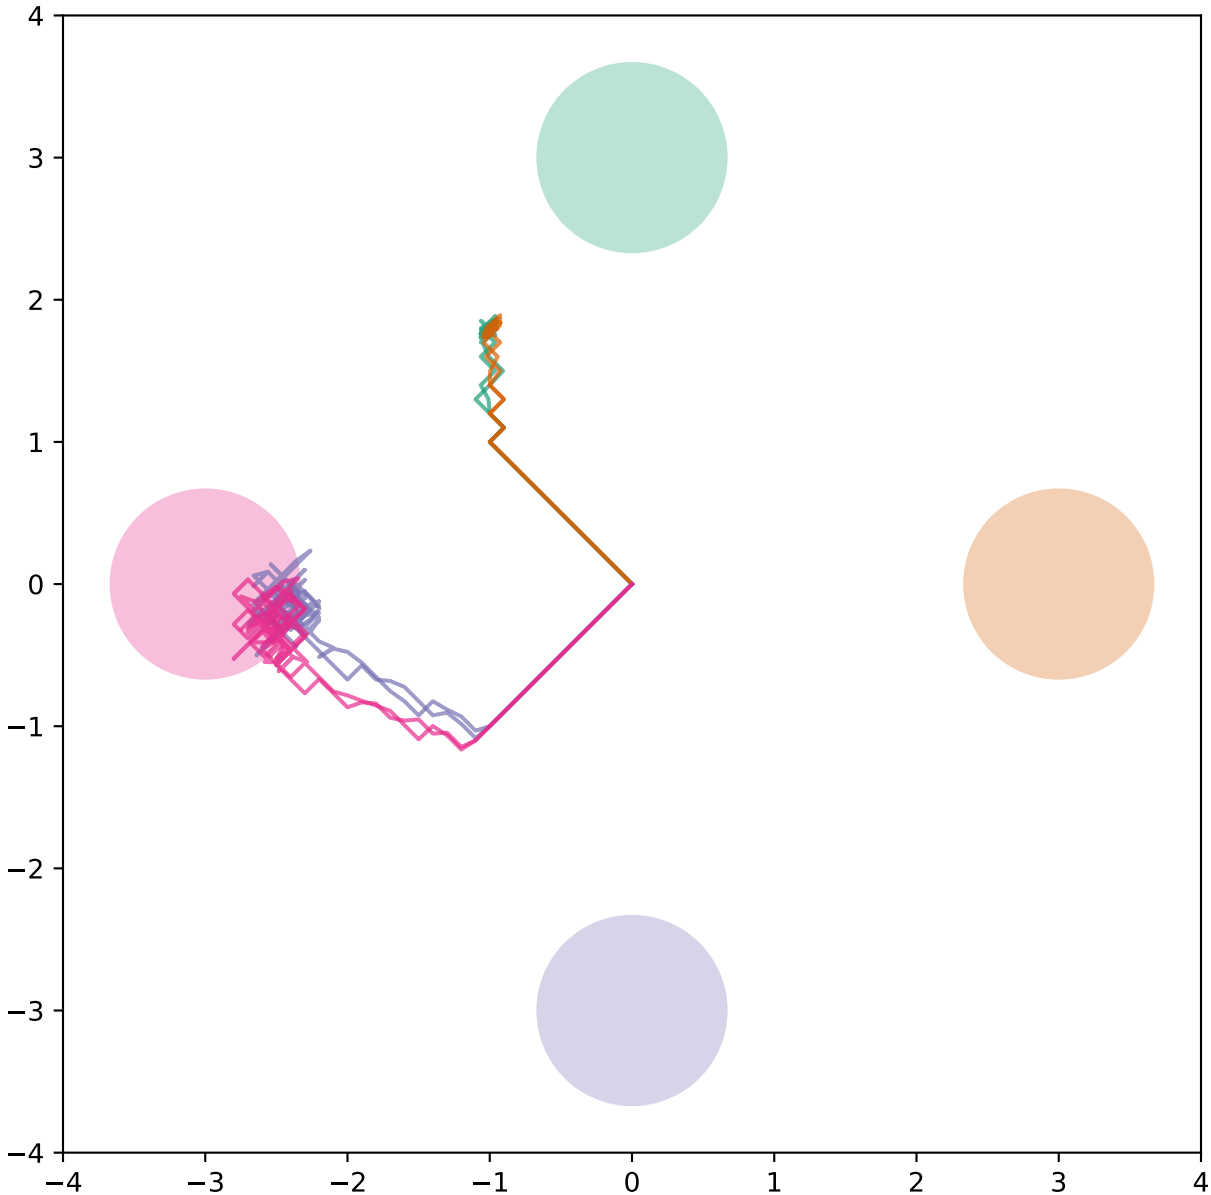

Top Right Bottom Left

Supplement: supplementary_material [file attachment]

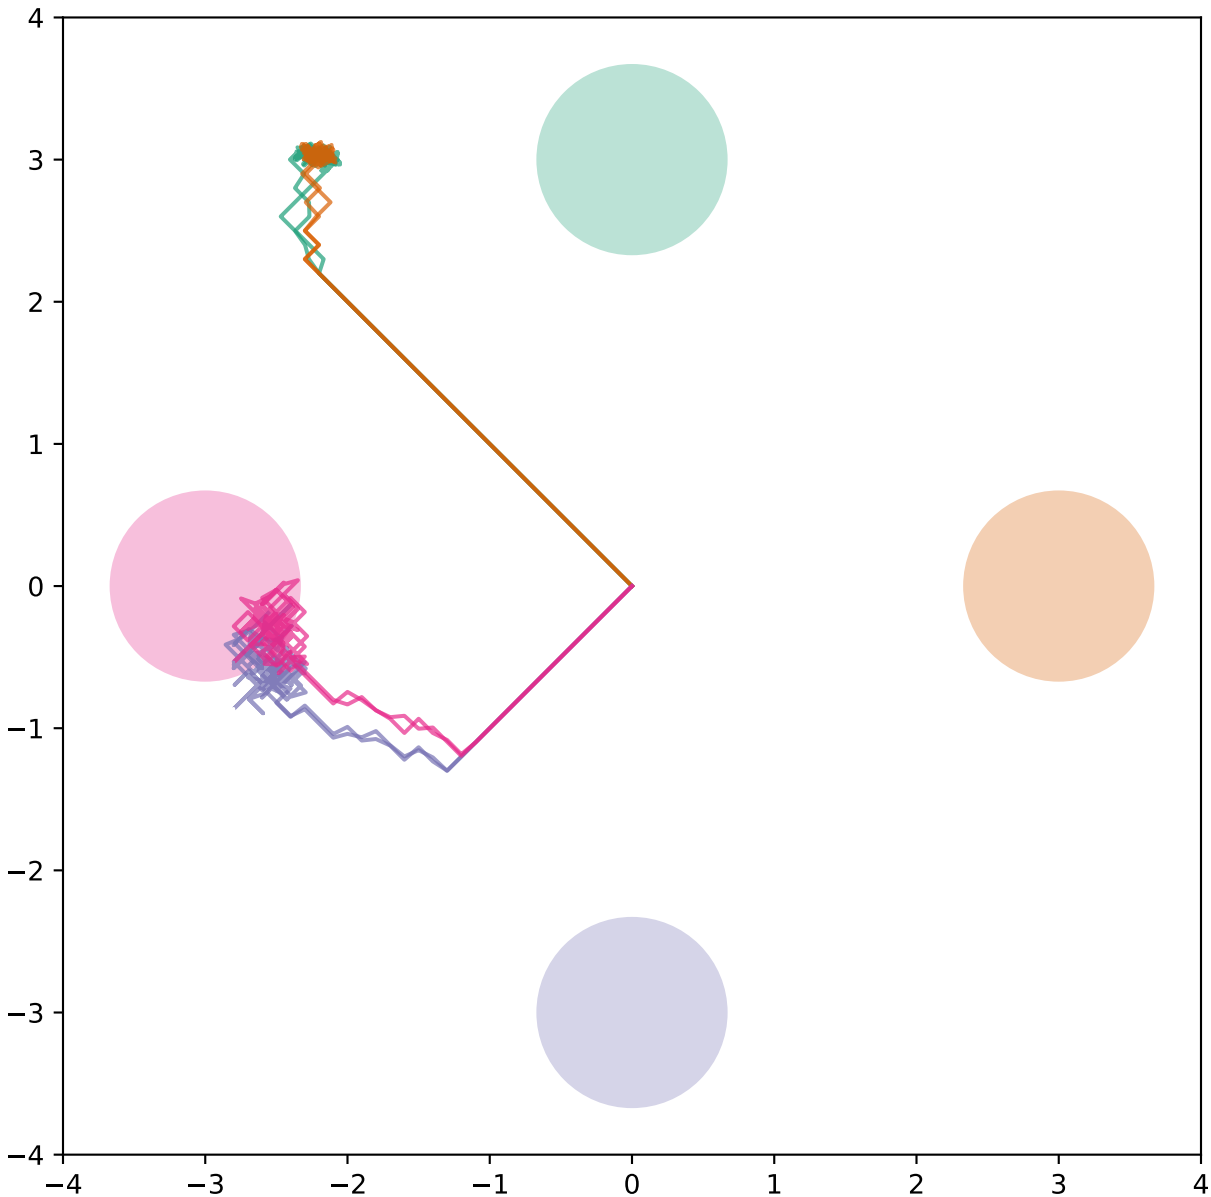

Top Right Bottom Left

Supplement: supplementary_material [file attachment]

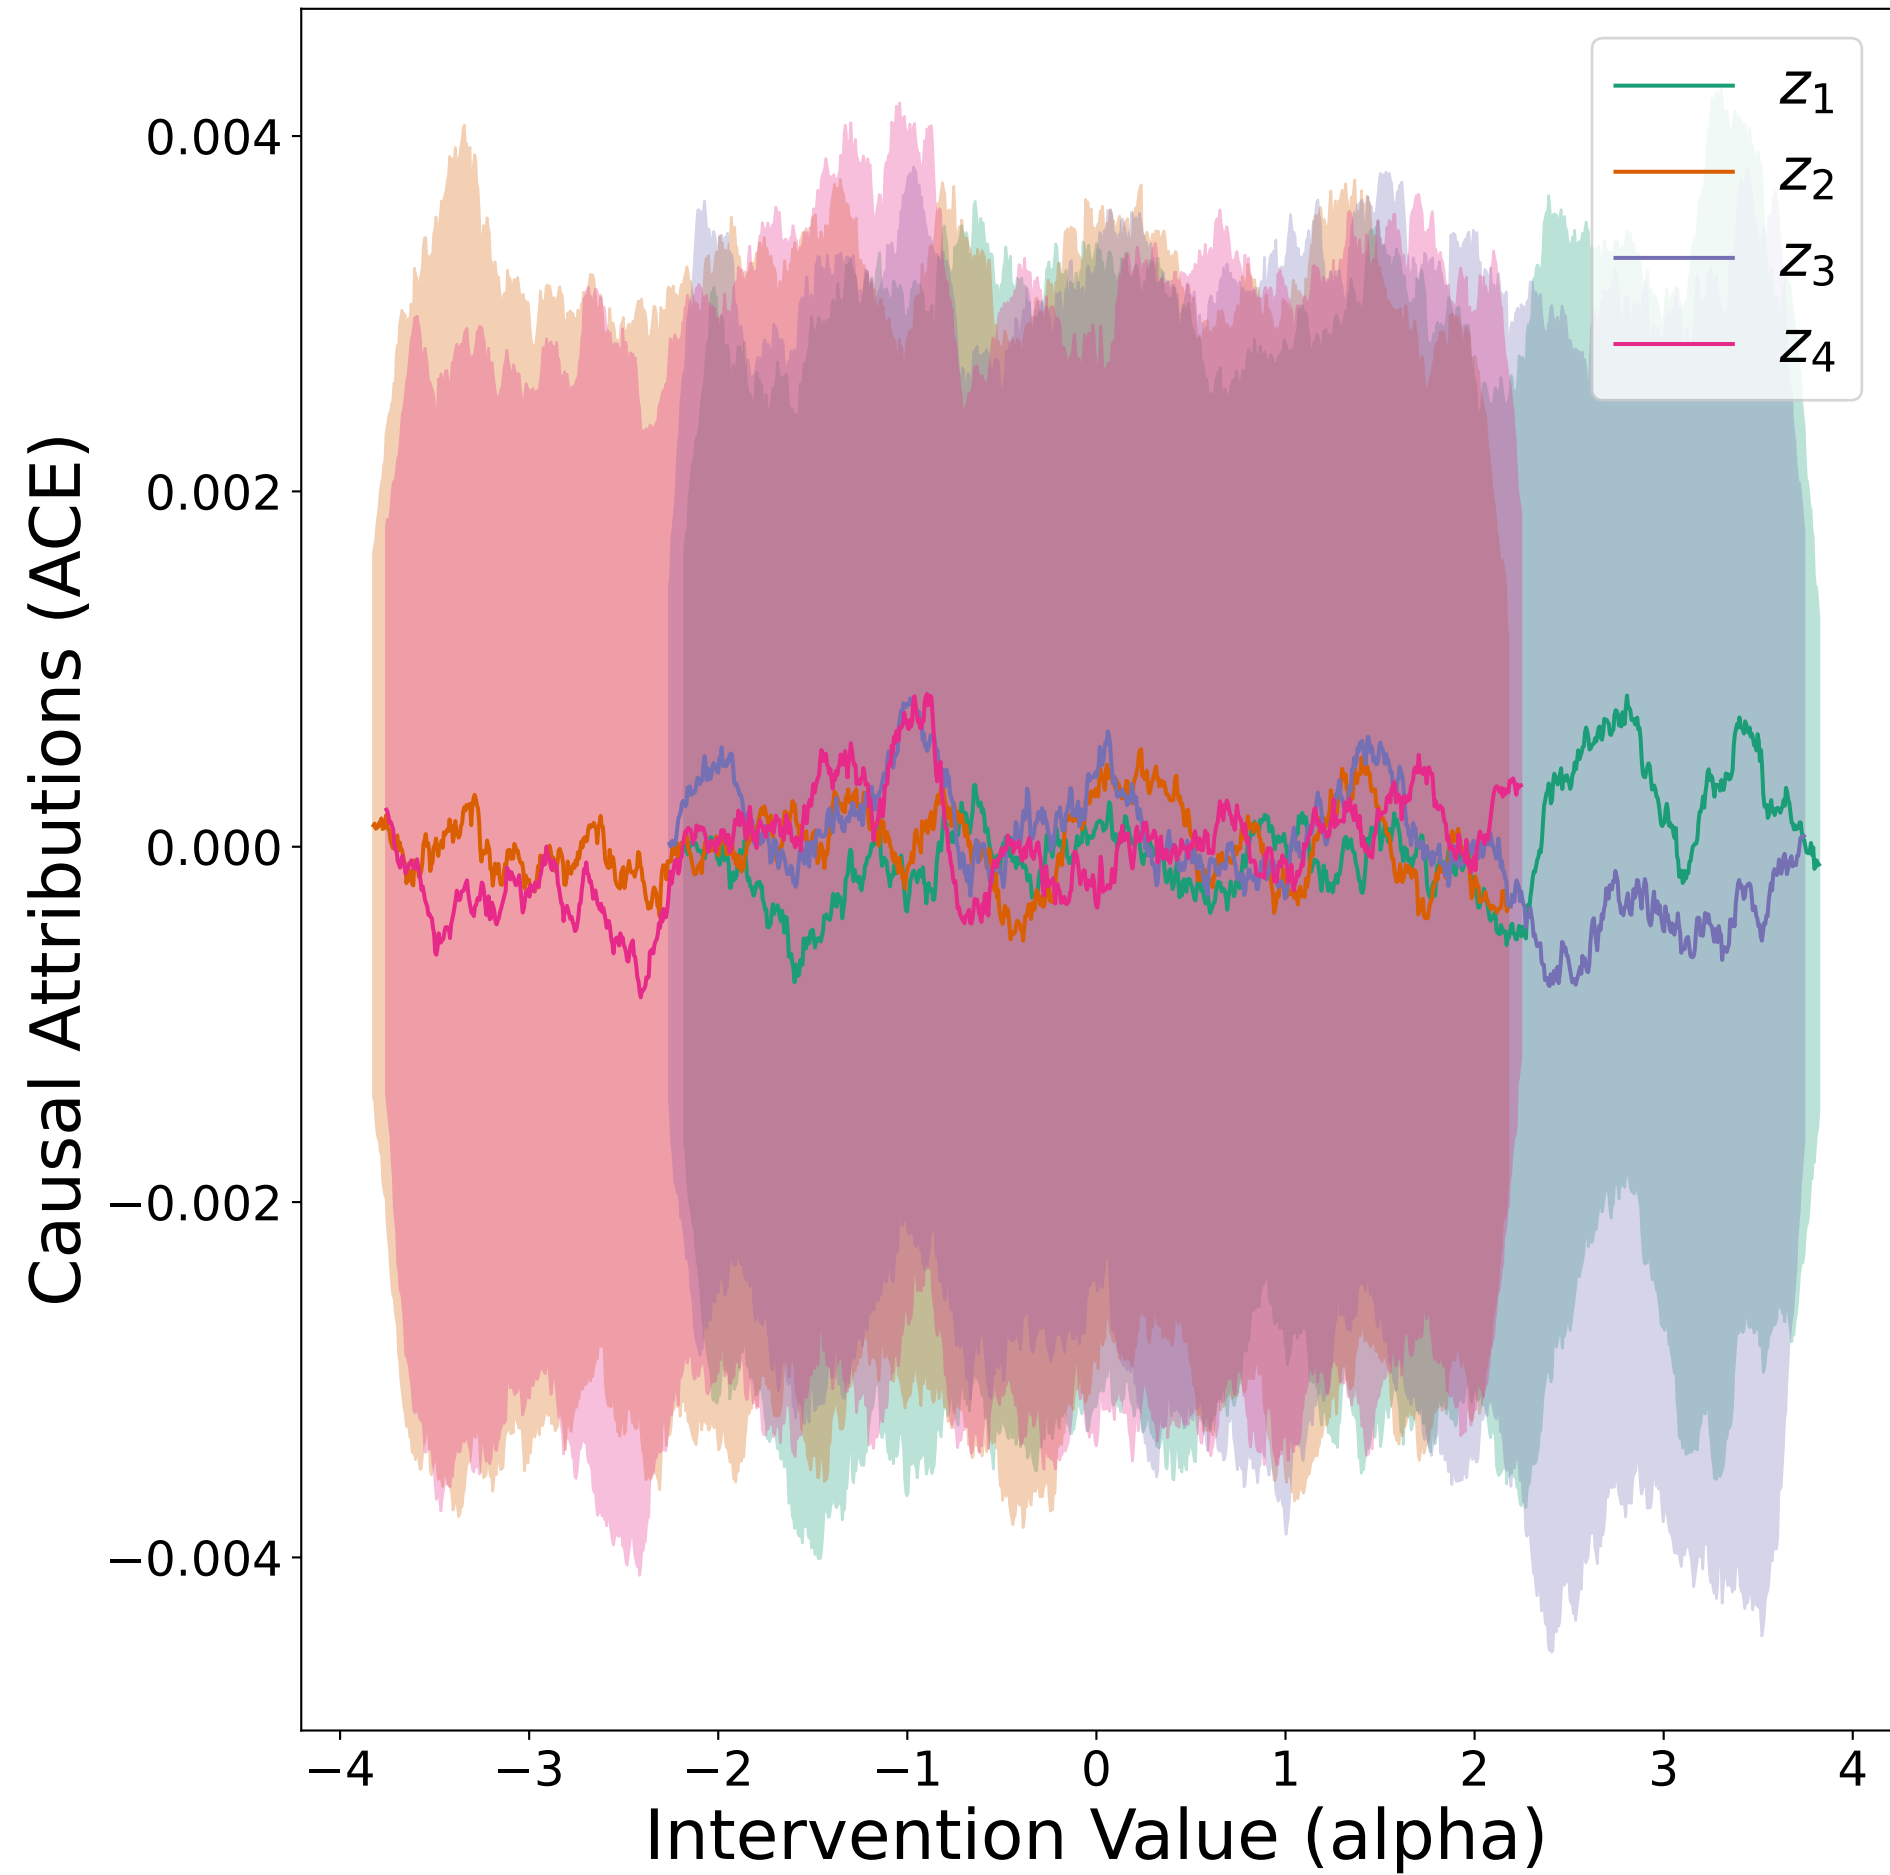

Supplement: supplementary_material [file attachment]

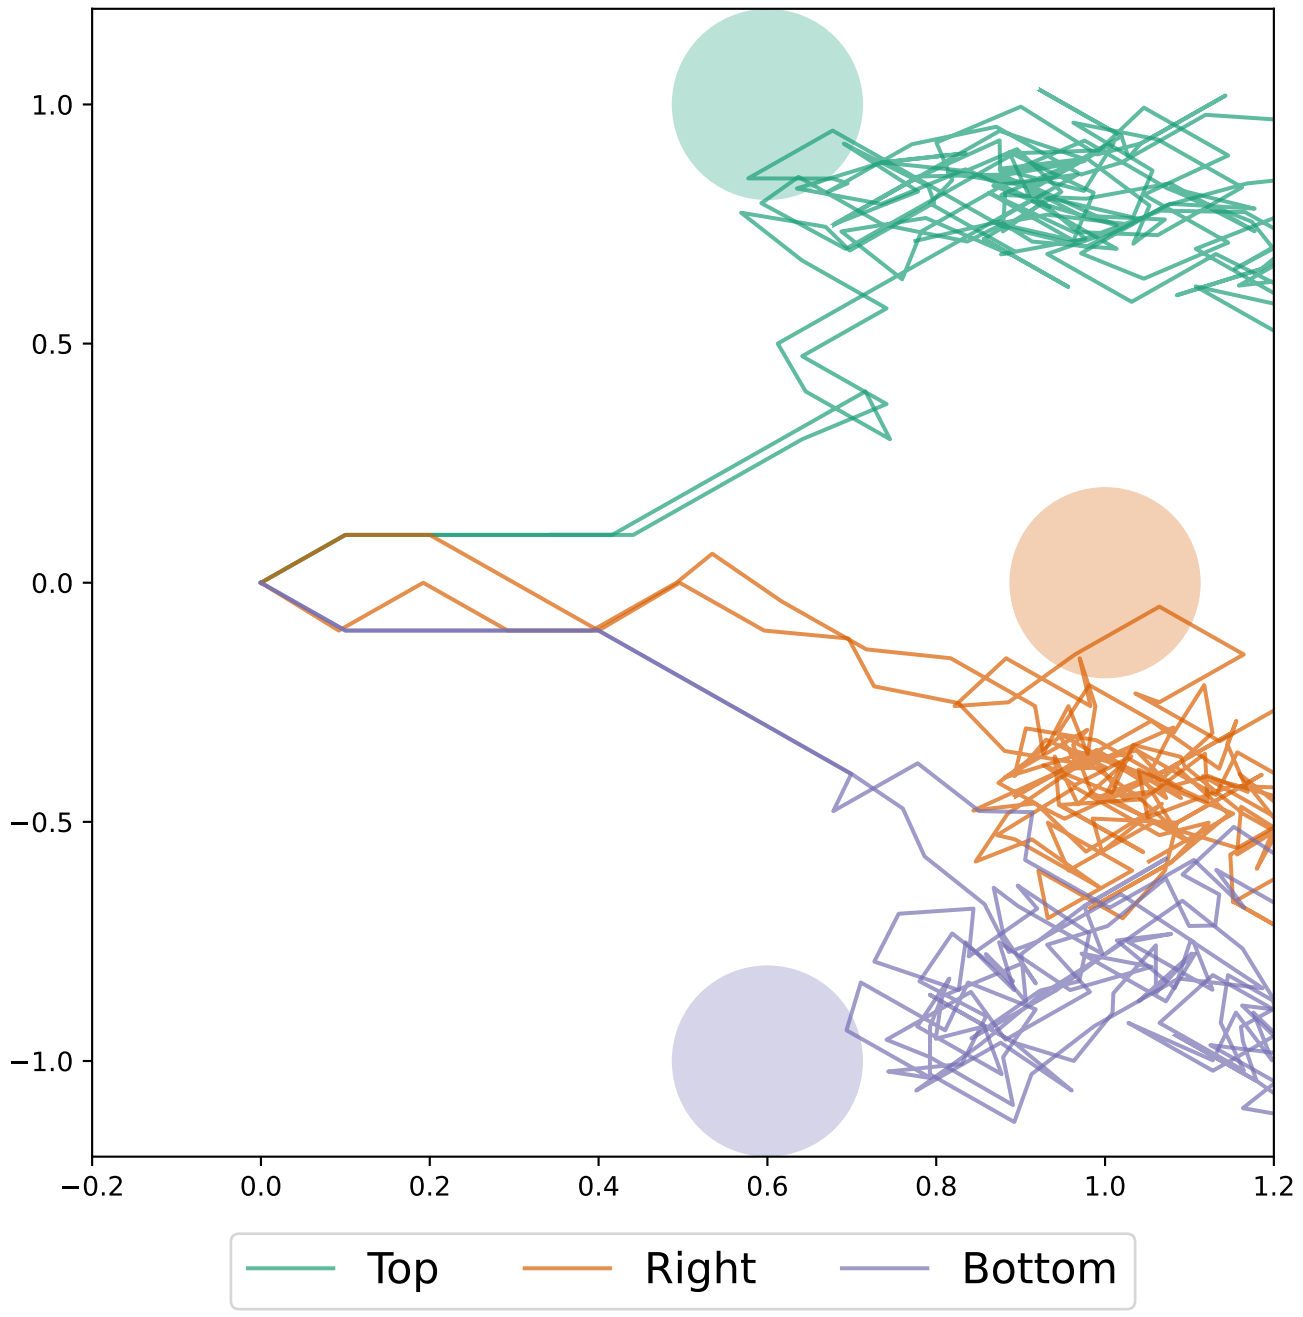

Supplement: supplementary_material [file attachment]

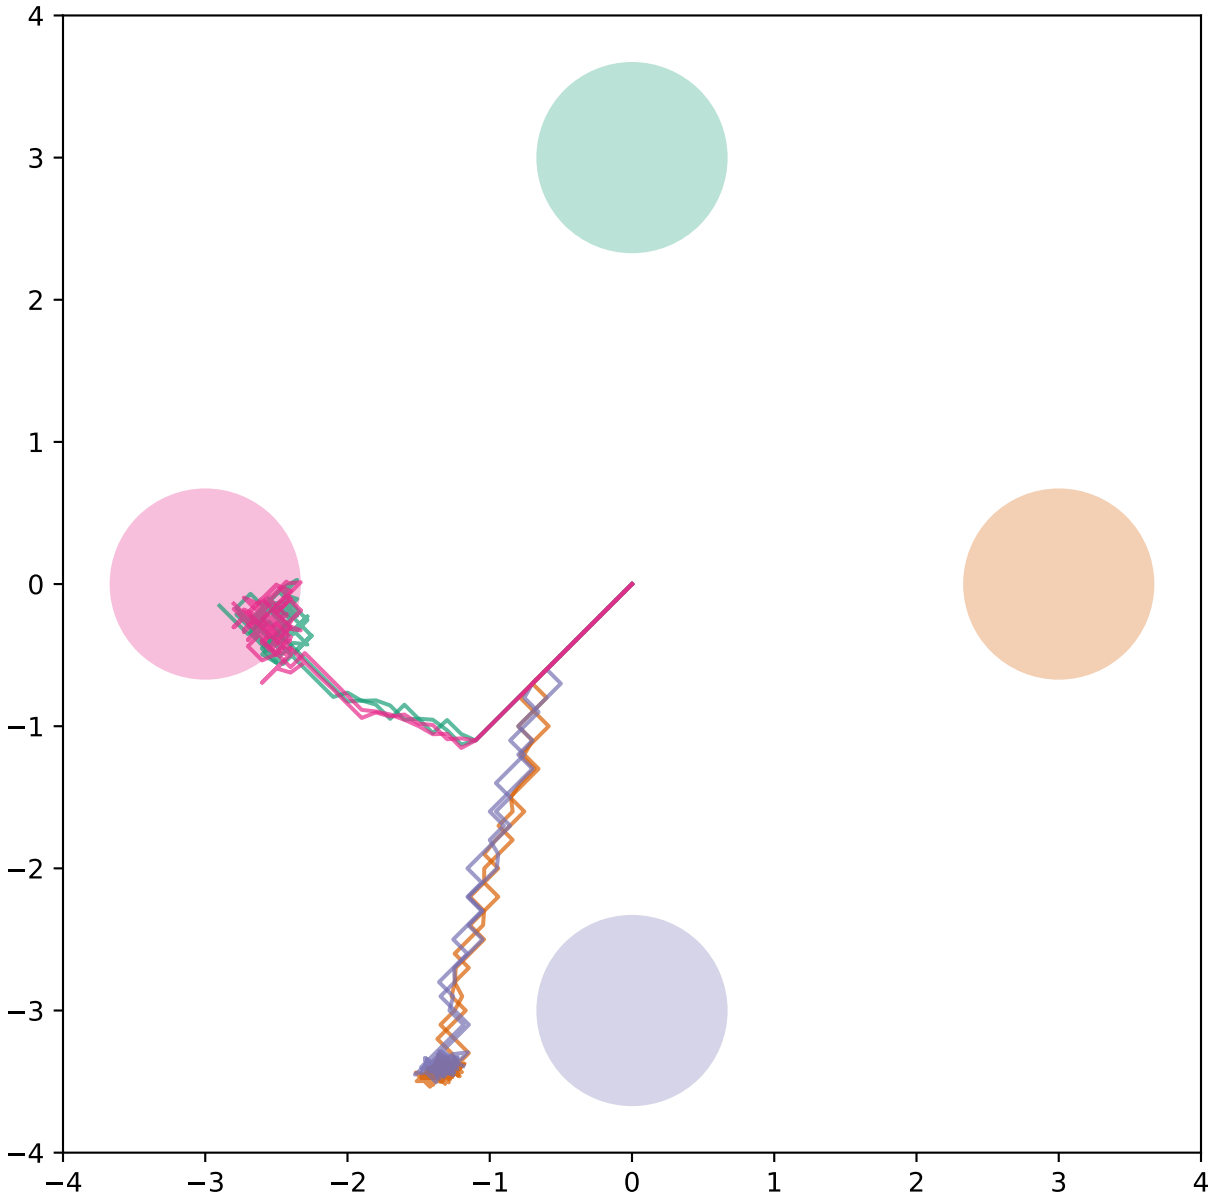

Top Right Bottom Left

Supplement: supplementary_material [file attachment]

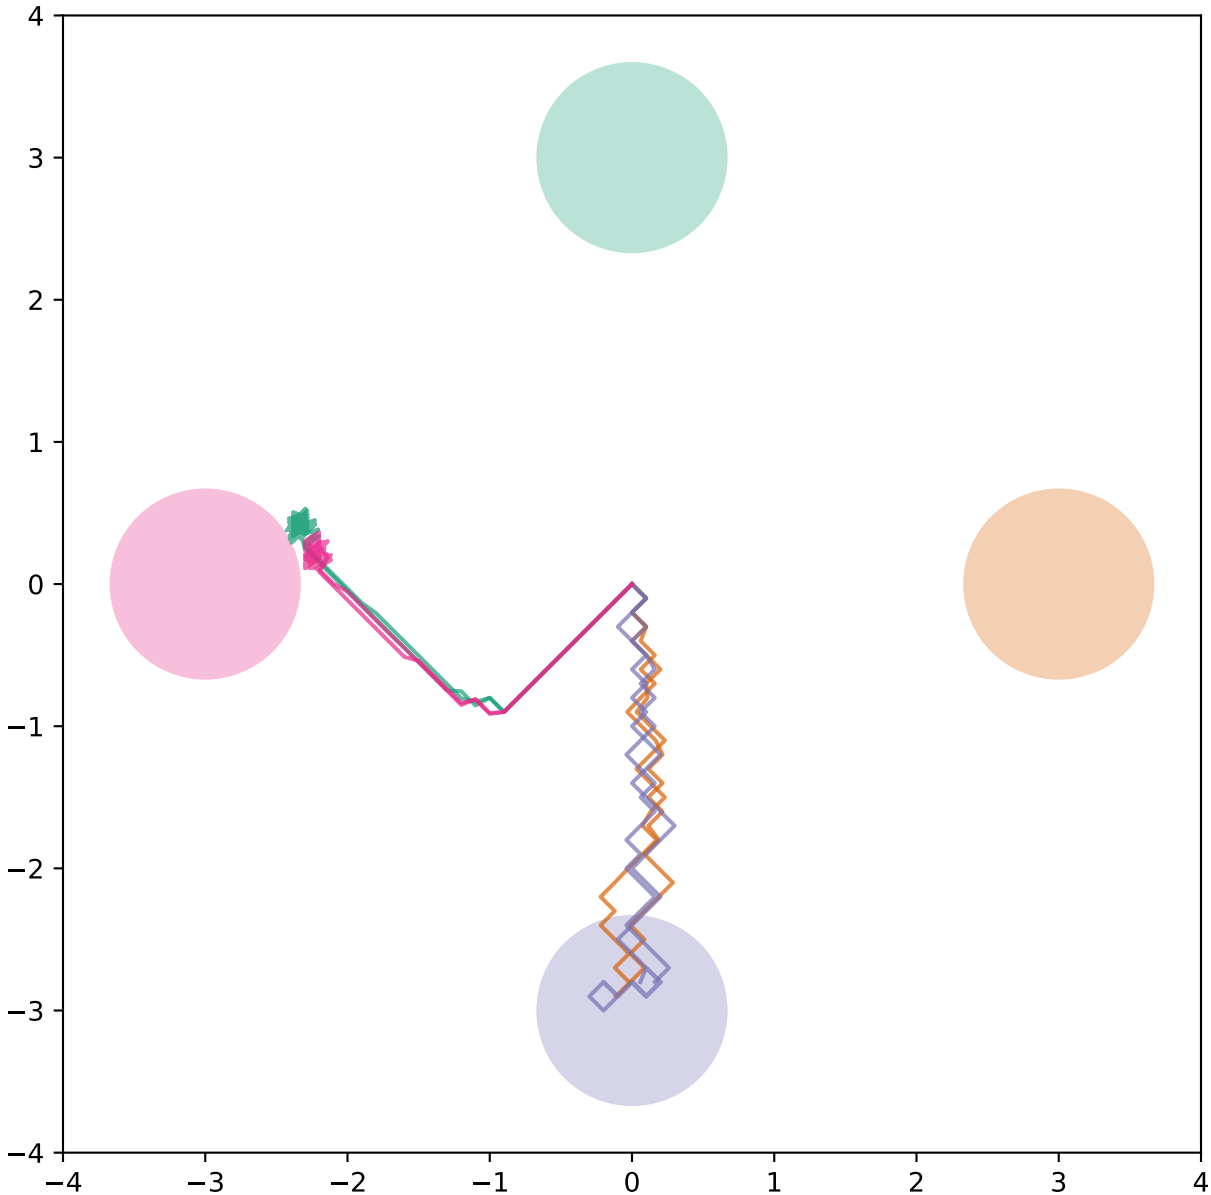

Top Right Bottom Left

Supplement: supplementary_material [file attachment]

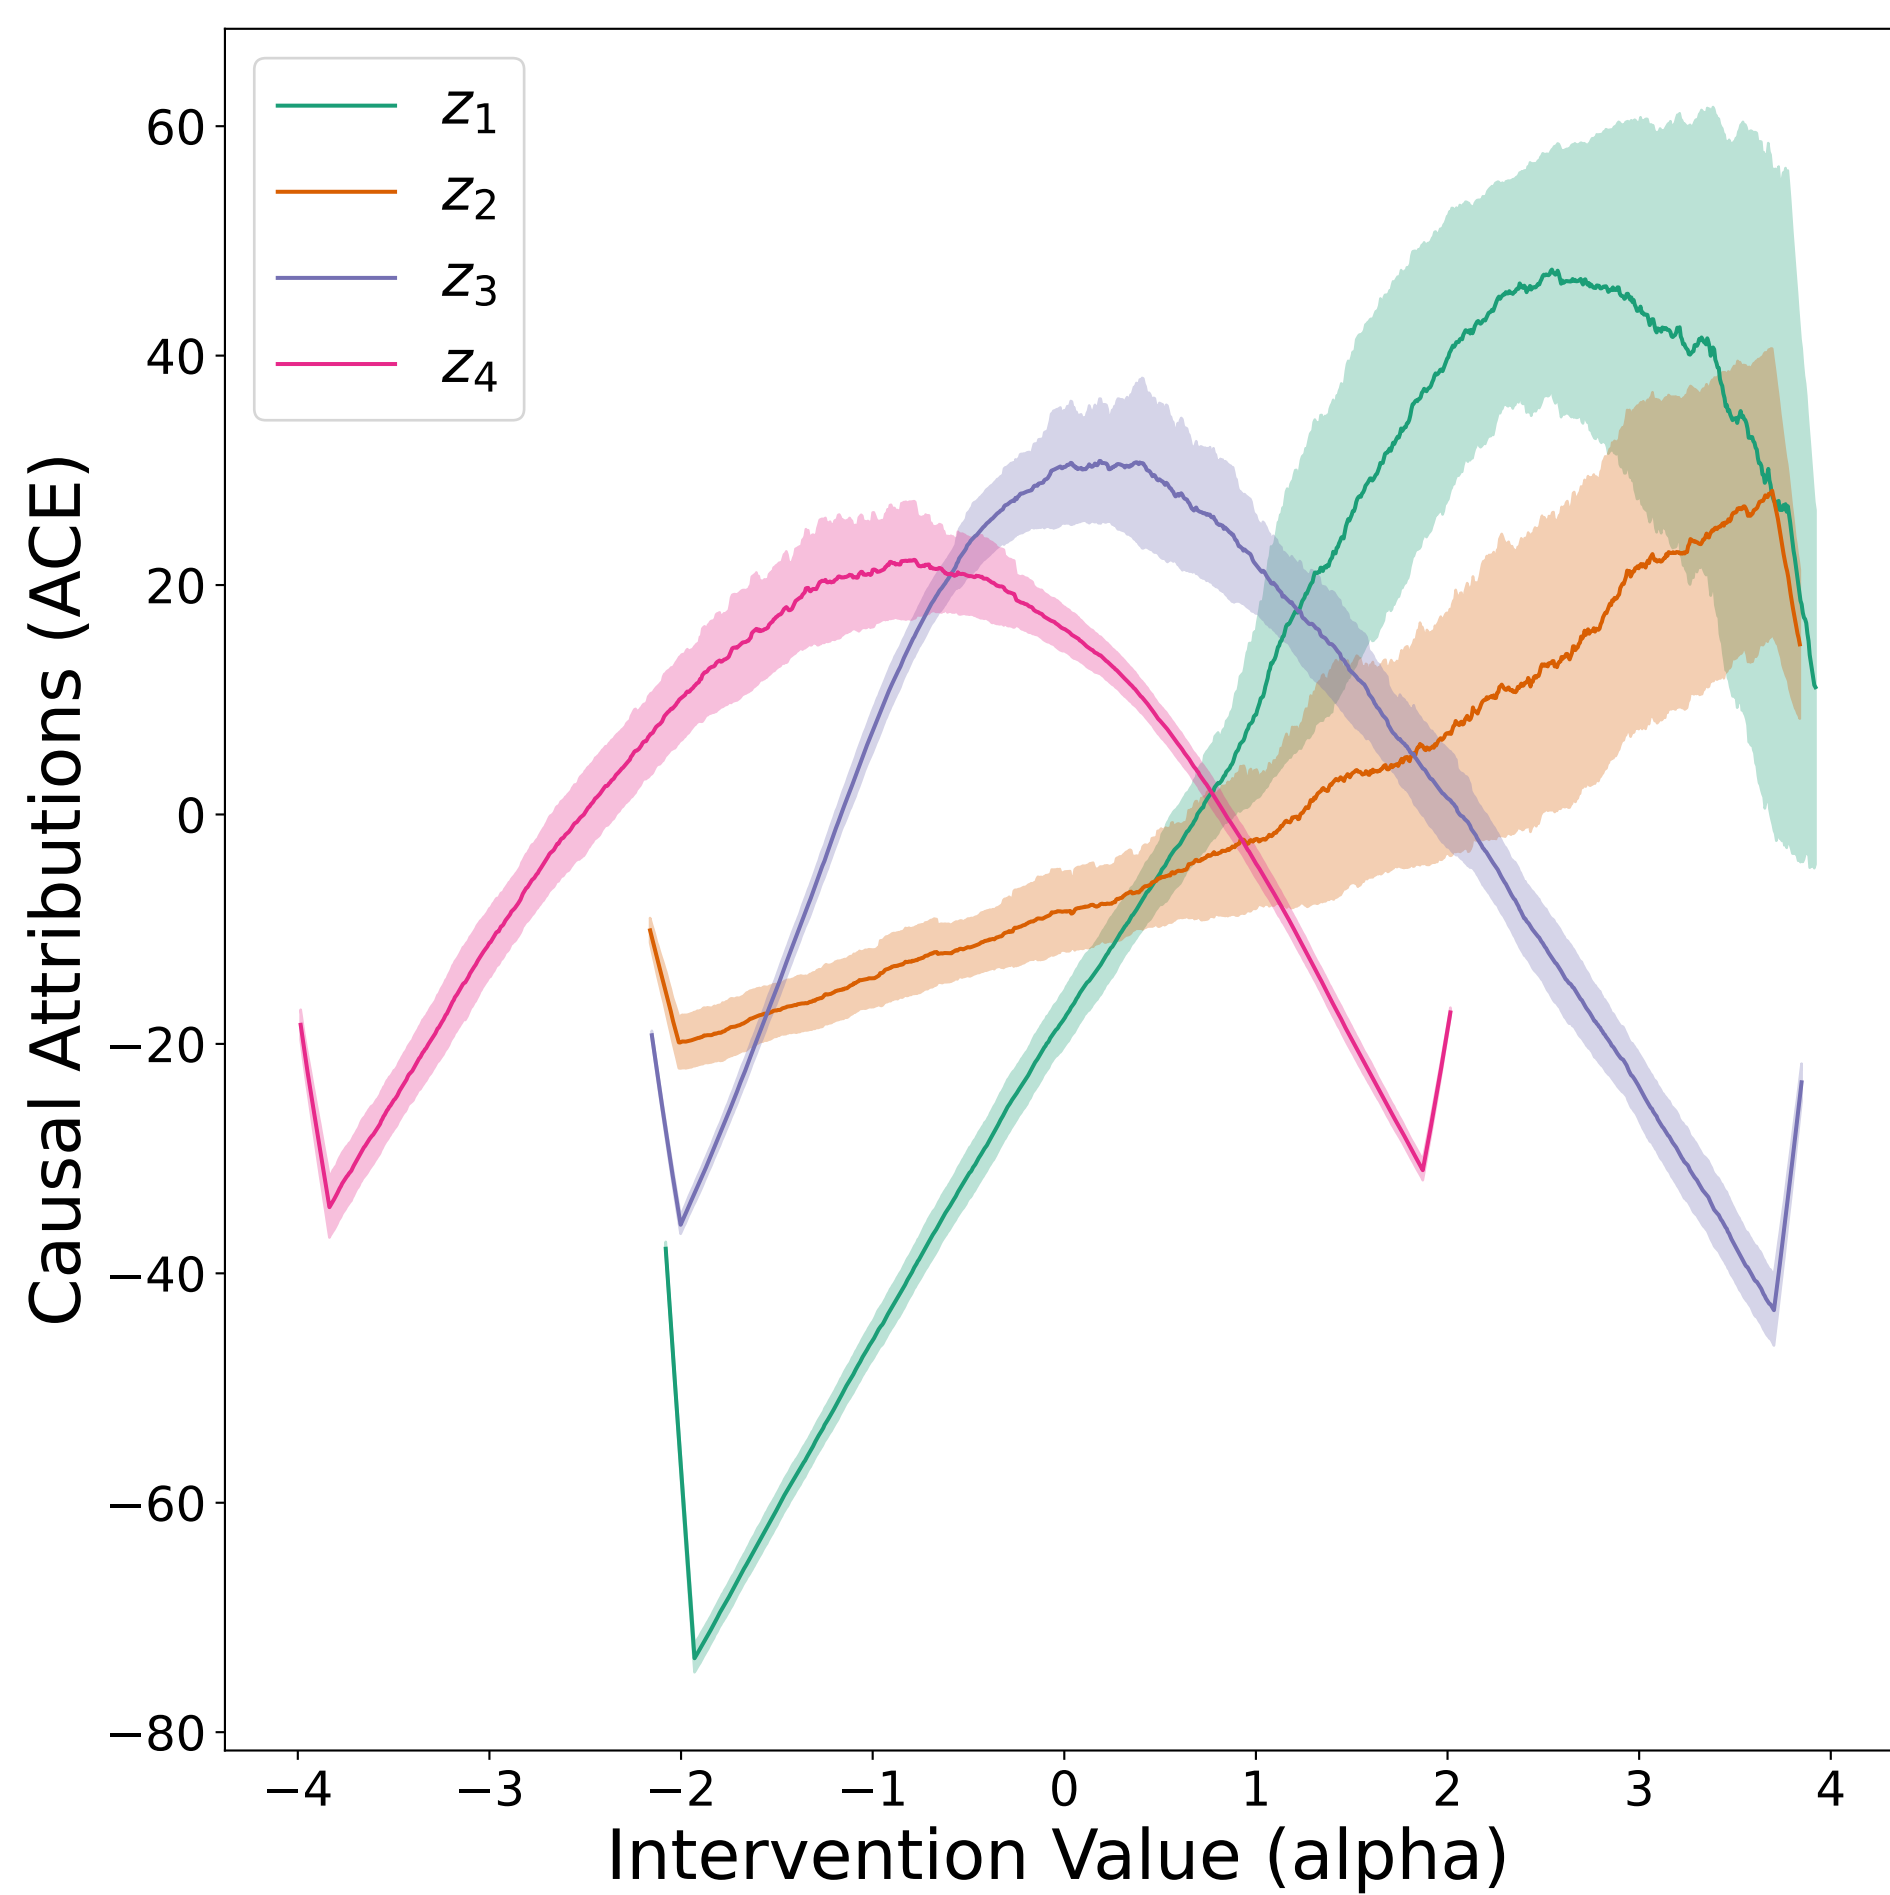

Supplement: supplementary_material [file attachment]

Causal Attributions (ACE)

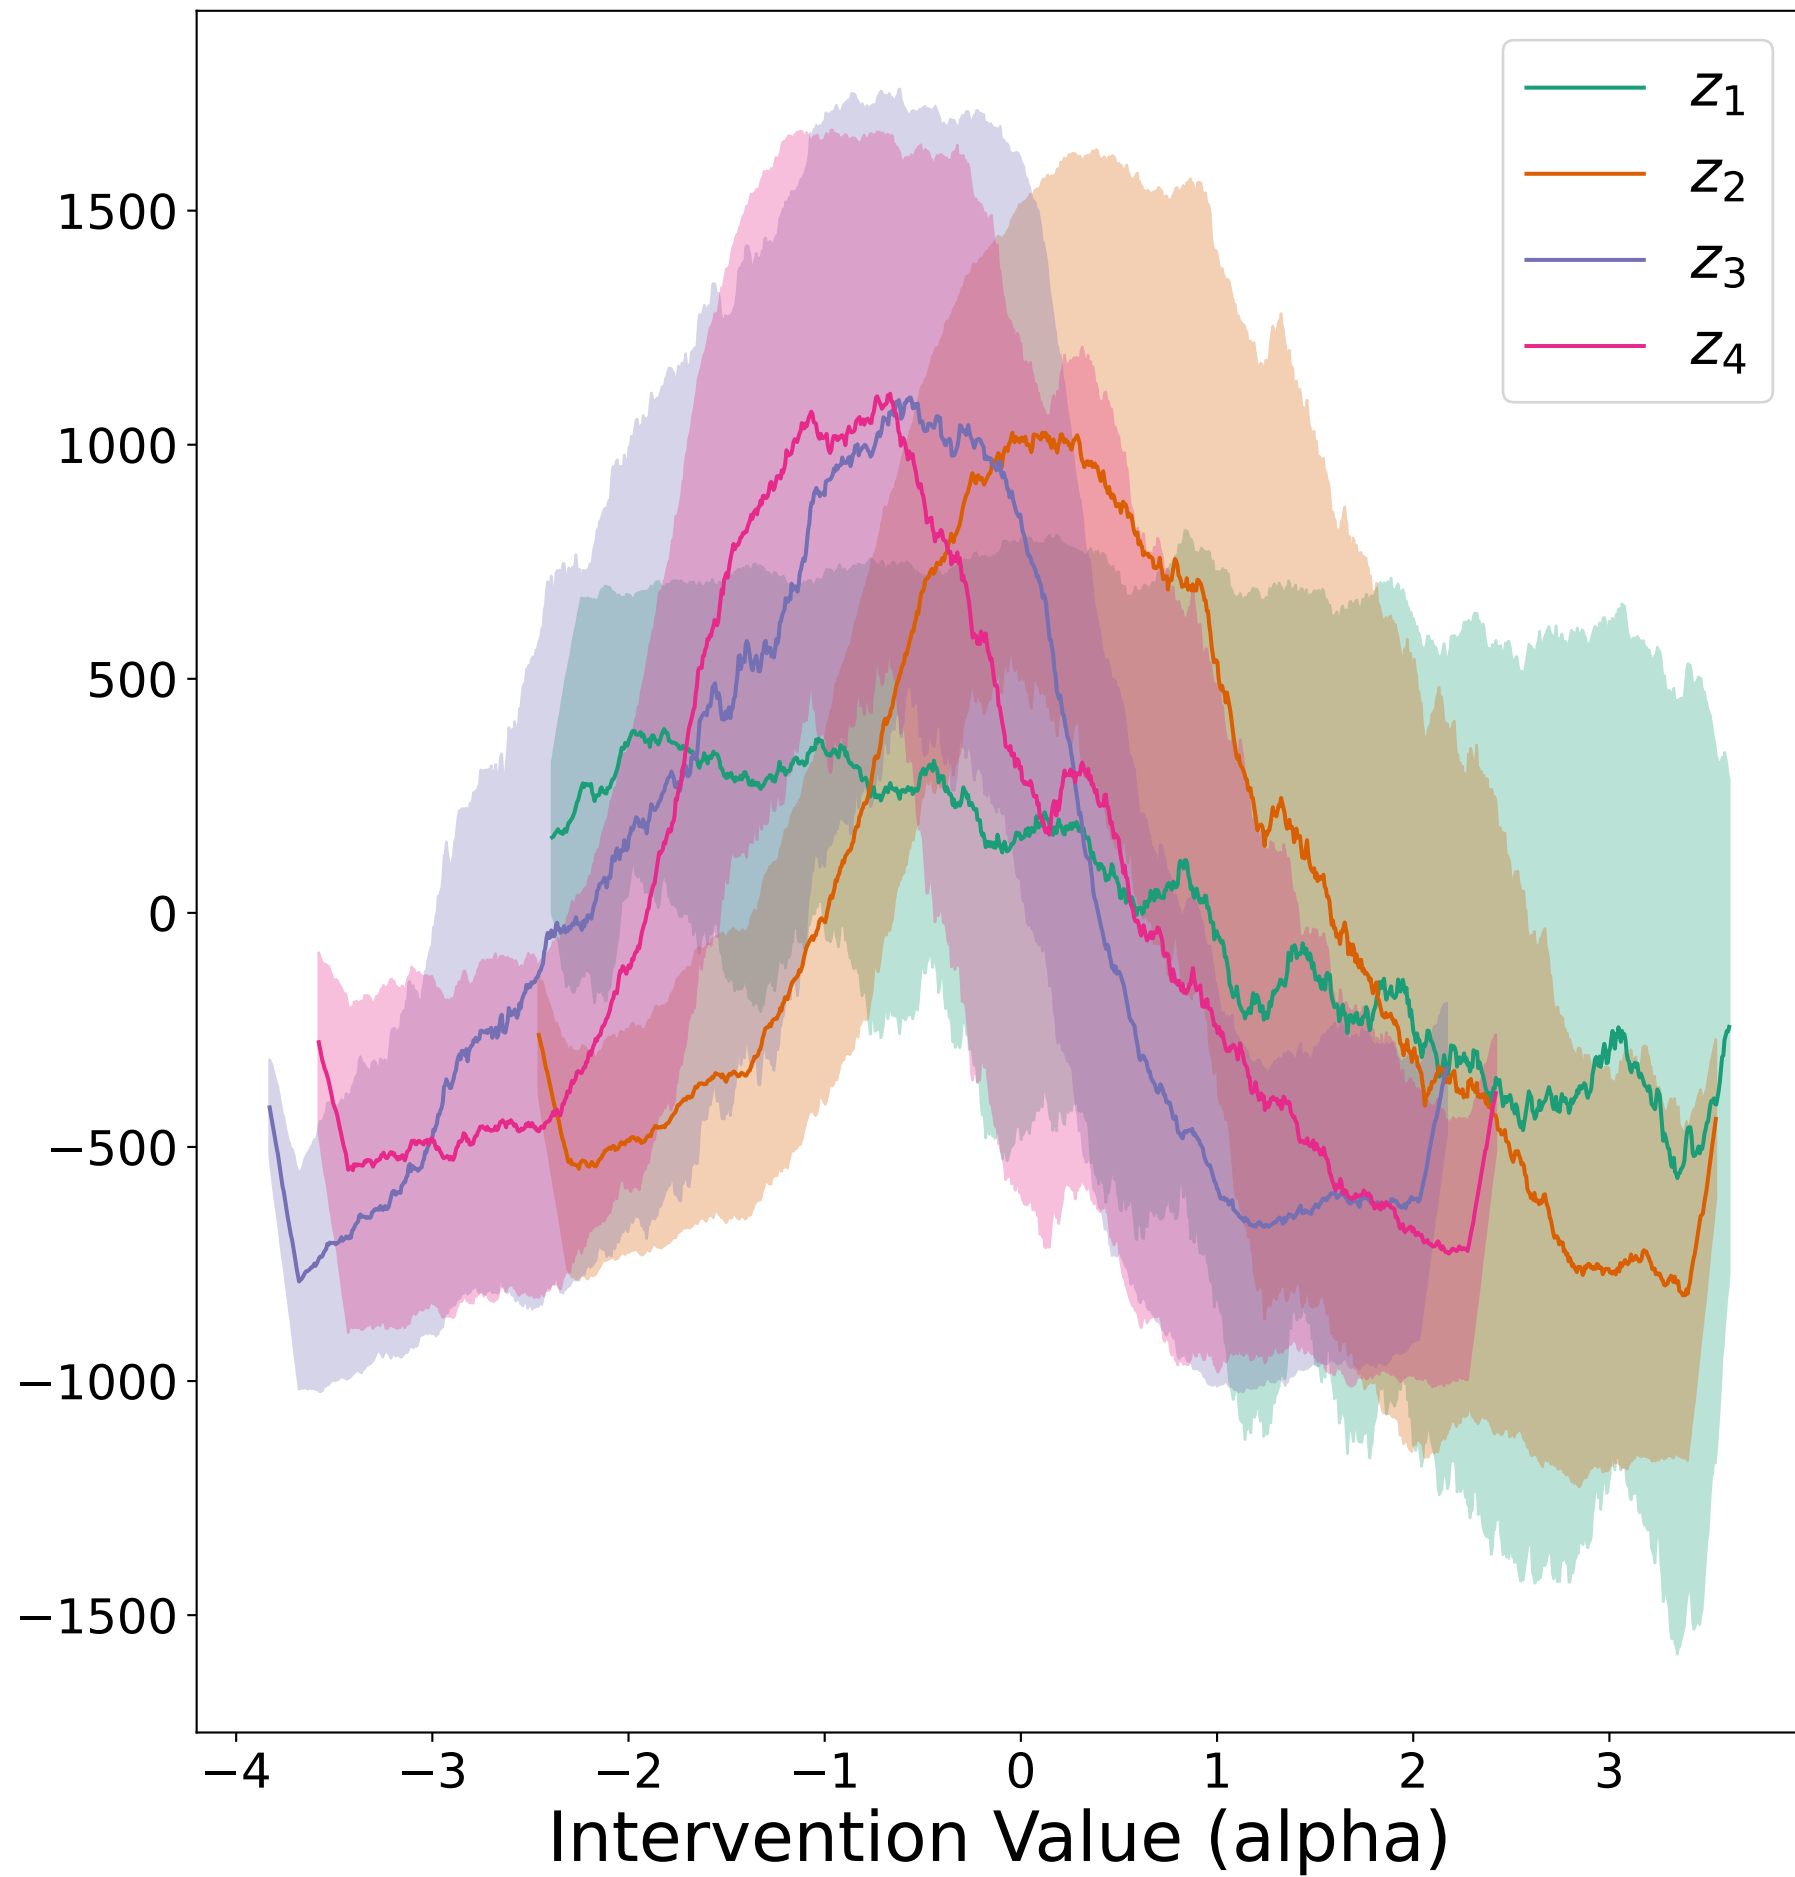

Supplement: supplementary_material [file attachment]

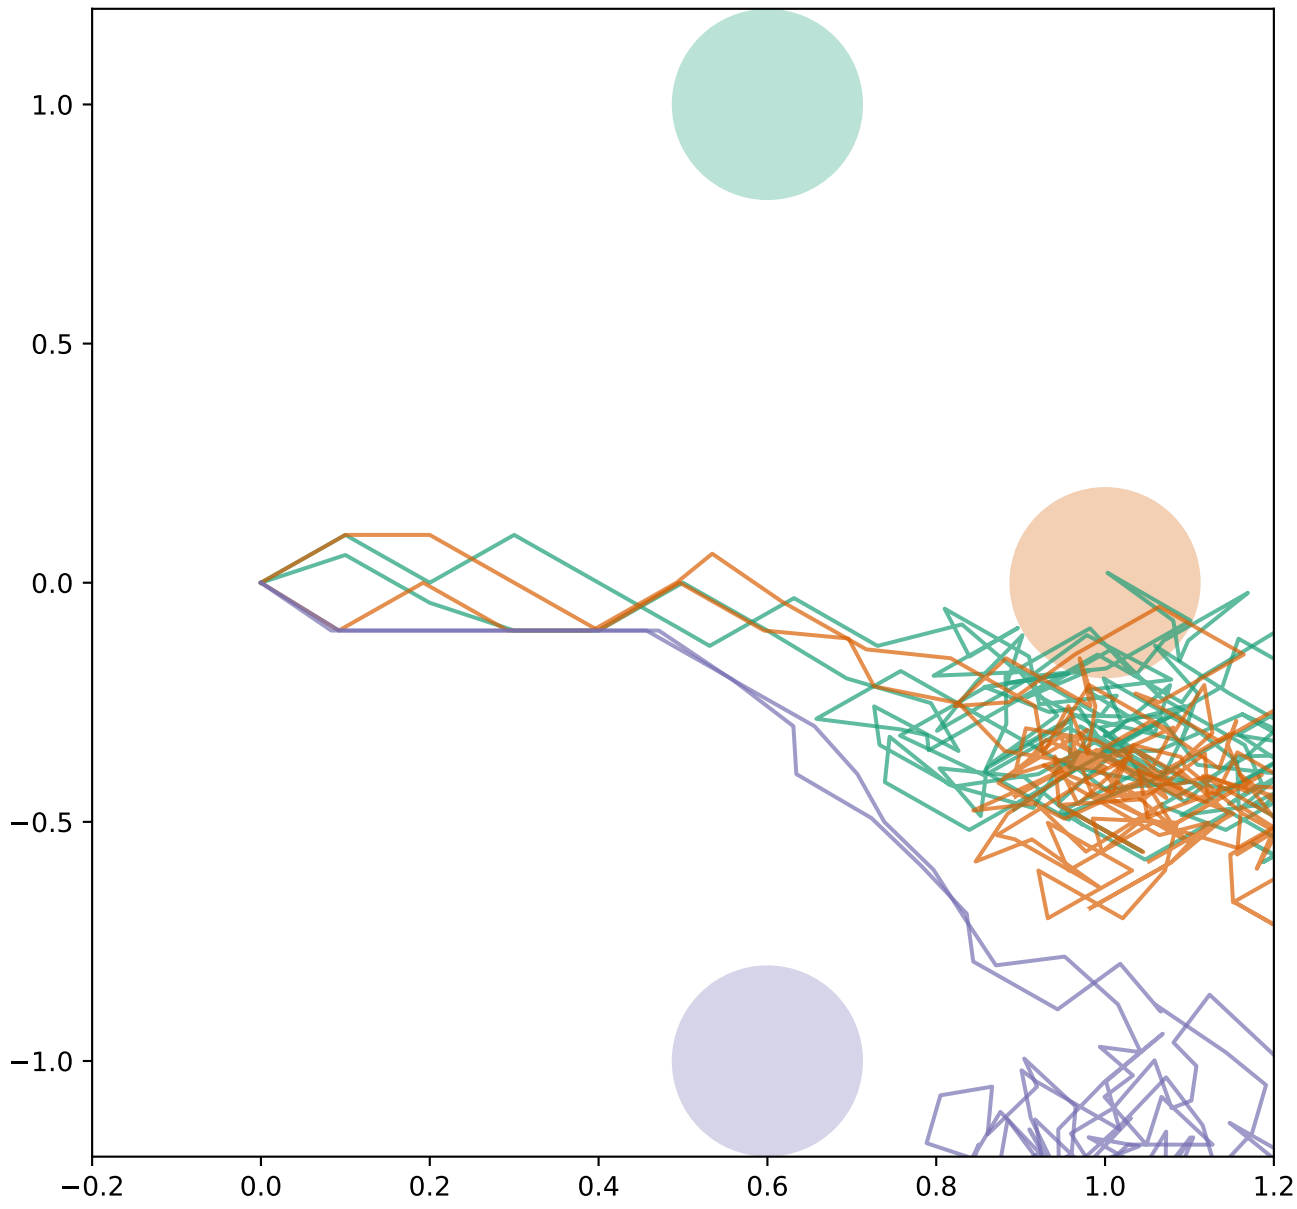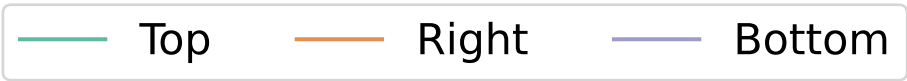

Supplement: supplementary_material [file attachment]

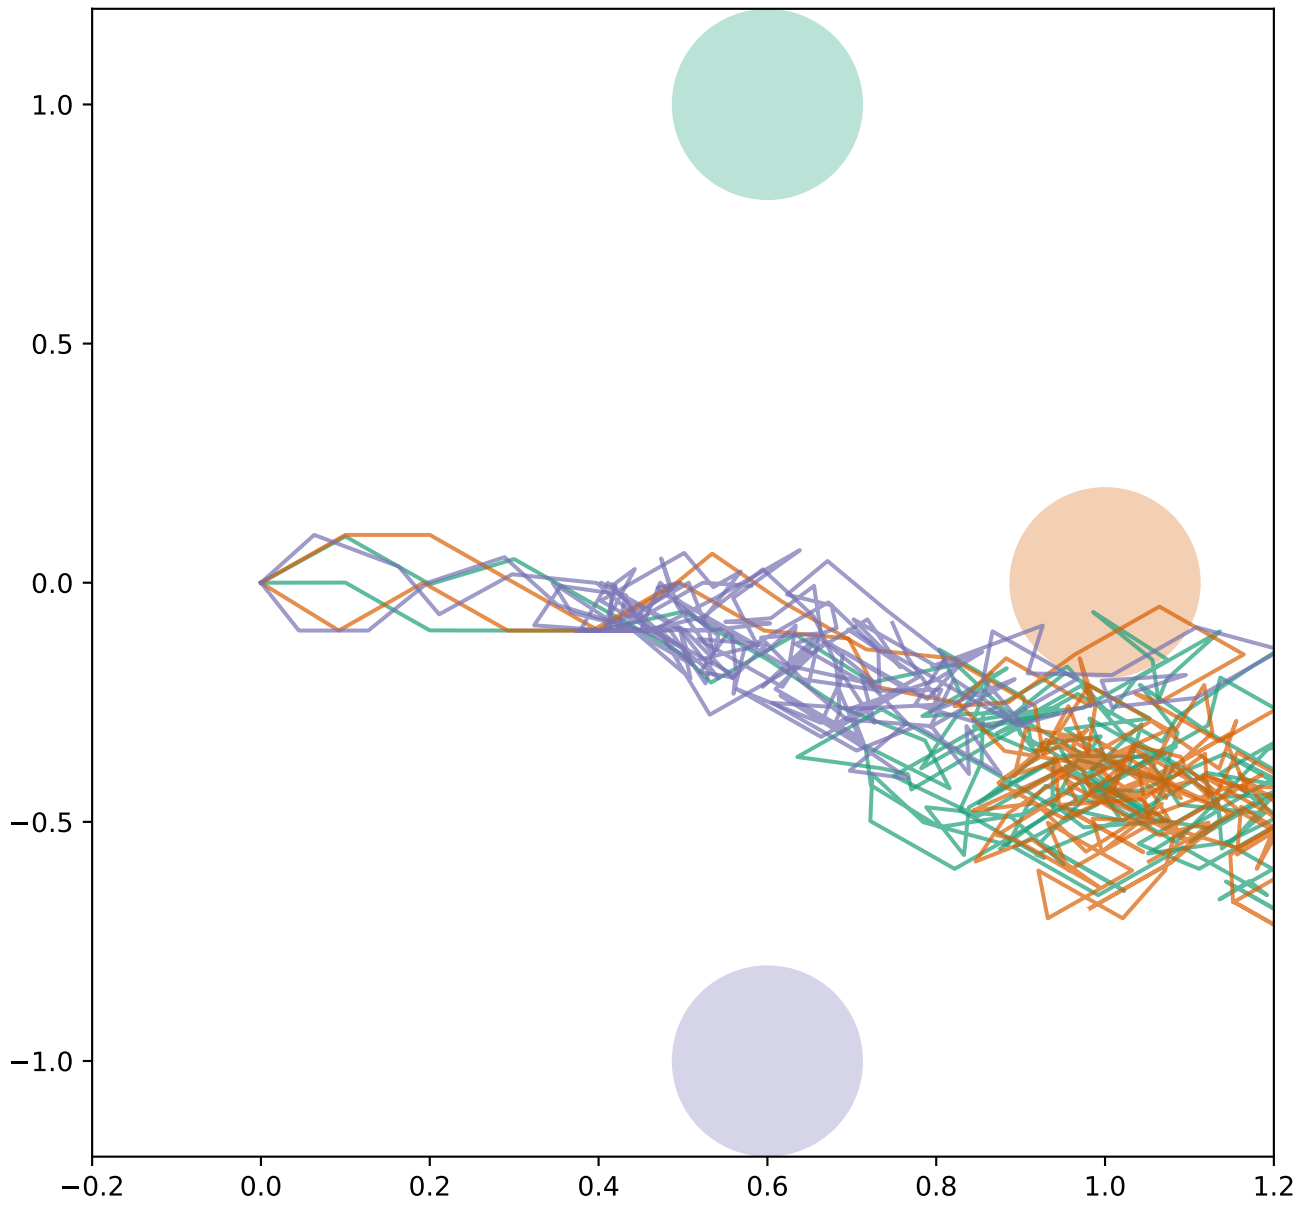

— Top      — Right      — Bottom

Supplement: supplementary_material [file attachment]

Average importance

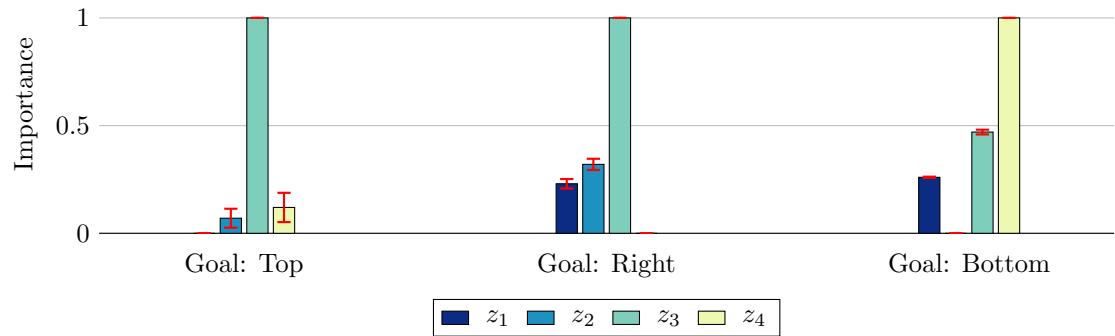

Supplement: supplementary_material [file attachment]
